# Supplementary material
Source: PubMed Central journal article supplement (PMC5304417)

*Supporting Information*

**Brominated luciferins are versatile bioluminescent probes**

**Table of Contents**

|                                                                           |             |
|---------------------------------------------------------------------------|-------------|
| <b>Figure S1</b>                                                          | <b>S-2</b>  |
| <b>Figure S2</b>                                                          | <b>S-3</b>  |
| <b>Figure S3</b>                                                          | <b>S-4</b>  |
| <b>Figure S4</b>                                                          | <b>S-5</b>  |
| <b>General experimental procedures</b>                                    | <b>S-6</b>  |
| <b>Synthetic experimental procedures</b>                                  | <b>S-11</b> |
| <b>Computational details</b>                                              | <b>S-23</b> |
| <b>References</b>                                                         | <b>S-35</b> |
| <b><math>^1\text{H}</math> and <math>^{13}\text{C}</math> NMR spectra</b> | <b>S-36</b> |

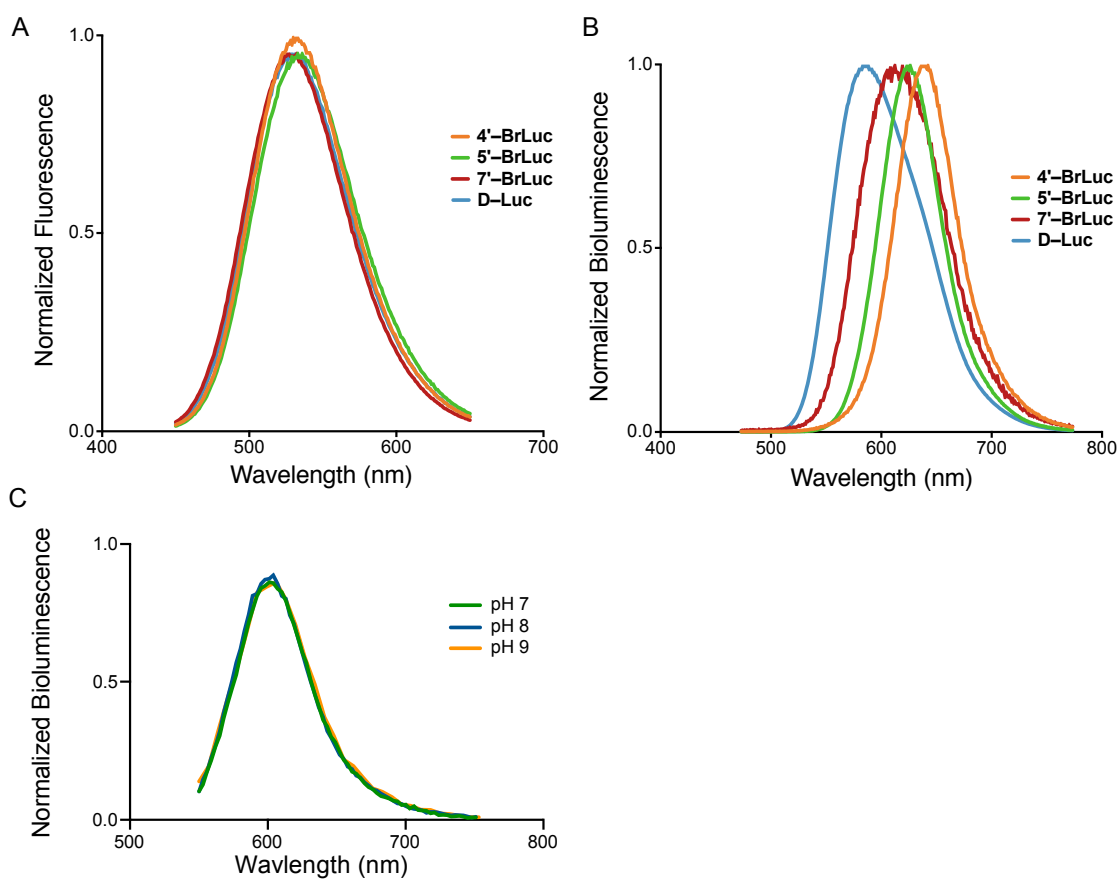

**Figure S1.** Optical analyses of luciferin analogs. (A) Fluorescence spectra of **D-Luc** and brominated analogs using 365 nm excitation light (pH 7.6). (B) Bioluminescence spectra of **D-Luc** and the brominated analogs at pH 7.6. (C) Bioluminescence spectra of **5'-BrLuc** at different pH values.

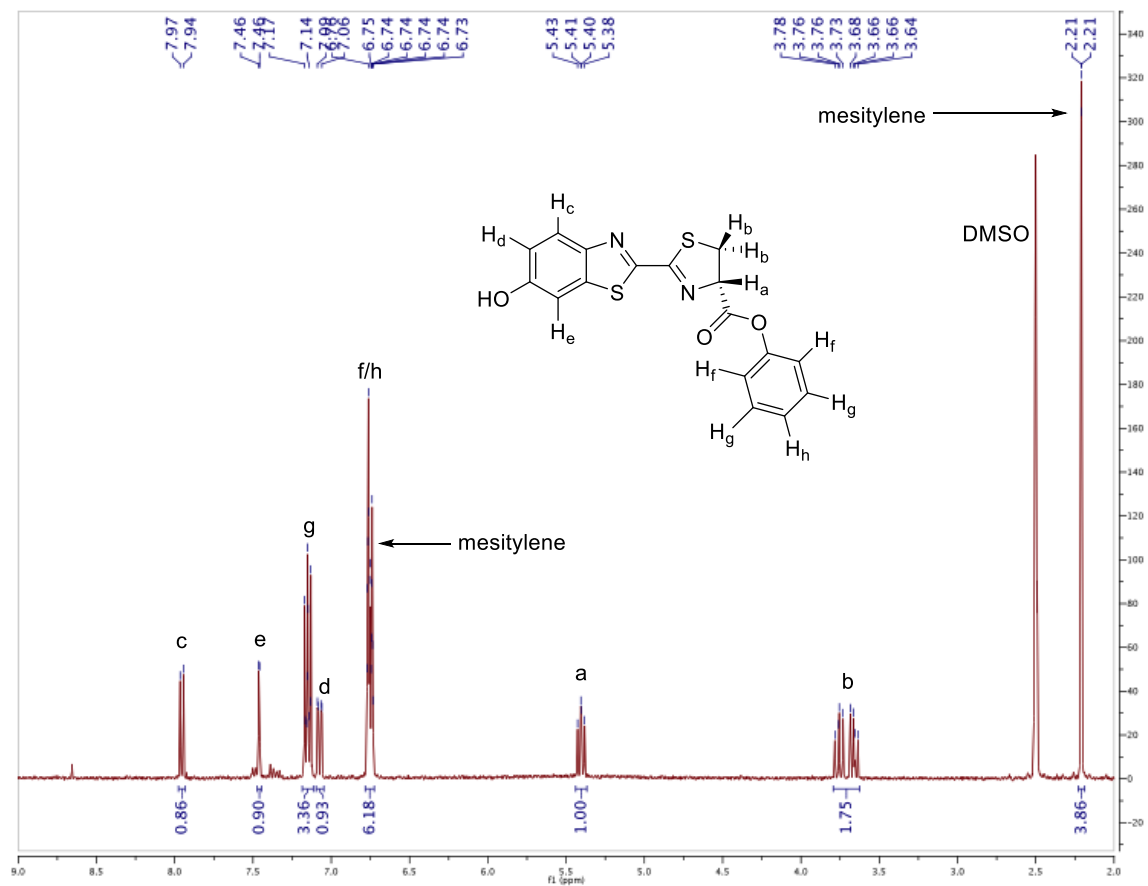

**Figure S2.** Representative  $^1\text{H}$  NMR spectrum of a luciferin phenyl ester prepared as described in the *General Experimental Procedures* section.

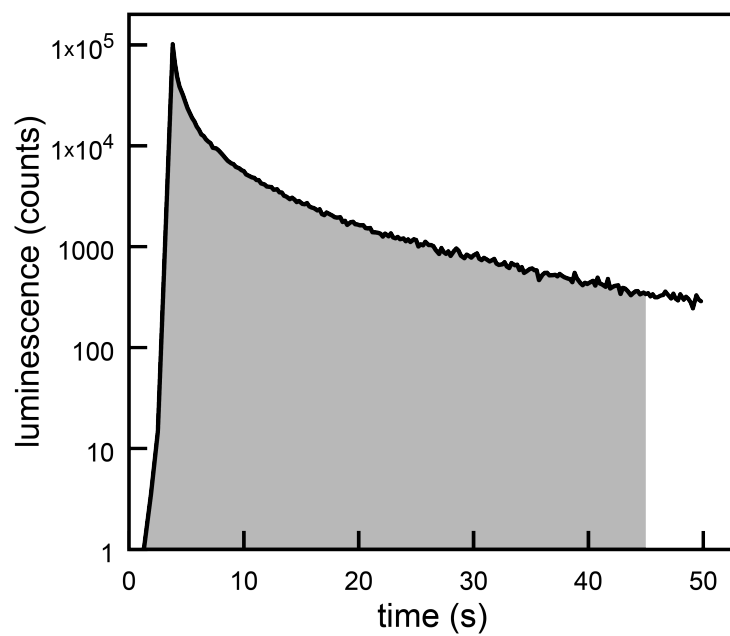

**Figure S3.** Representative luminescence data following the addition of base to the phenyl ester of **D-Luc** (as described in the *General Experimental Procedures* section). The shaded area denotes the region used for trapezoidal integration.

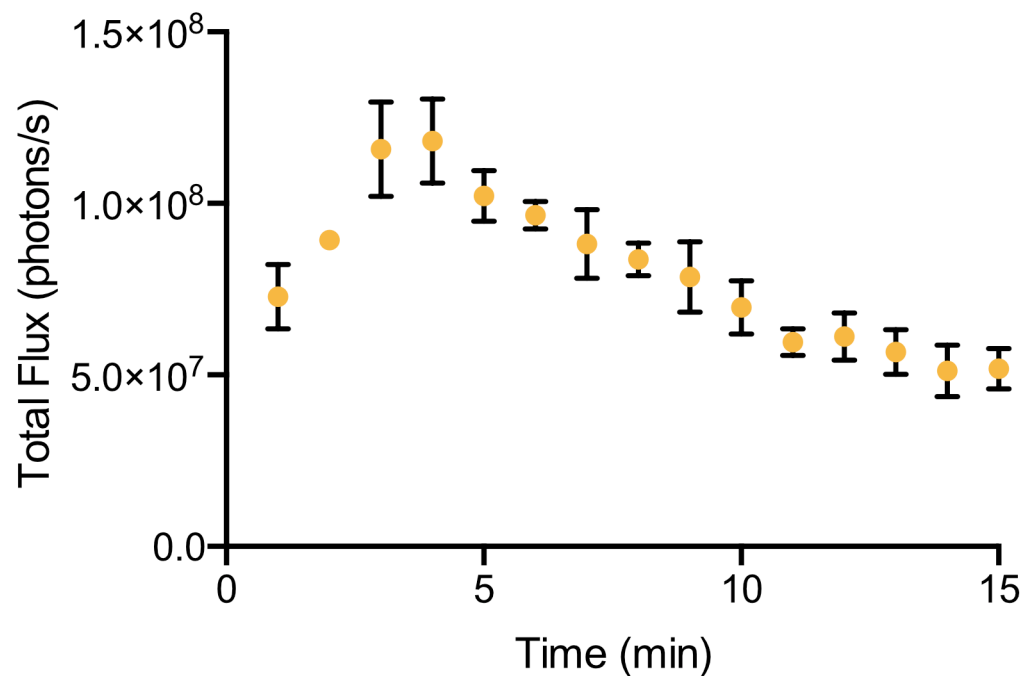

**Figure S4.** Luciferin analog **5'-BrLuc** (100  $\mu$ L of a 1 mM solution) was administered (i.v.) into a luciferase transgenic mouse, and bioluminescence images were acquired. Photon flux values were integrated over the entire animal, and plotted as total flux (shown). Data are representative of  $n = 3$  independent experiments.

## **General Experimental Procedures**

### ***Expression and purification of Fluc***

Firefly luciferase was expressed and purified as previously described.<sup>[1]</sup>

### ***Bioluminescence kinetic measurements***

Measurements were acquired on a Tecan F200 Pro injection port luminometer with a neutral density filter. Reactions were performed in black 96-well flat-bottom plates (Grenier). Bioluminescence buffer<sup>[2]</sup> (93.5  $\mu$ L of 20 mM Tris-HCl pH 7.6, 2 mM MgSO<sub>4</sub>, 2 mM ATP, 0.1 mM EDTA, 1 mM TCEP, 0.5 mg/mL BSA) was added to each well, followed by coenzyme A (0.5  $\mu$ L of a 100 mM solution) and luciferin substrate (1  $\mu$ L of a 0.01-100 mM solution in DMSO). The luminescence from each well was measured for 30 s prior to the addition of Fluc (5  $\mu$ L of a 1 mg/mL solution in bioluminescence buffer). Luminescence was then recorded every 0.1 s over a 1-min period. Samples were analyzed in triplicate and multiple runs were performed. The emission maxima were determined by averaging the largest photon outputs from five independent runs.  $K_m$  and relative  $k_{cat}$  values were determined using nonlinear regression analyses and robust fit outlier removal in GraphPad Prism (version 6.0f for Macintosh, GraphPad Software).

### ***Bioluminescence imaging (in vitro)***

Imaging was performed using an IVIS Lumina (Xenogen) system equipped with a cooled CCD camera. Reactions were performed in black 96-well flat-bottom plates (Grenier). Bioluminescence buffer (93.5  $\mu$ L) was added to each well, along with coenzyme A (0.5  $\mu$ L of a 100 mM solution) and luciferin substrate (1  $\mu$ L of a 0.5-100

mM solution in DMSO). To initiate photon production, Fluc (5  $\mu$ L of a 1 mg/mL solution in bioluminescence buffer) was added to each well. The plate was then briefly agitated and placed in the IVIS instrument. The bioluminescent output was recorded every 5-30 s over a 45-75 min time period. Measurements were performed in triplicate.

### ***Bioluminescence imaging (in cellulo)***

HEK293 cells stably expressing Fluc (provided by the Contag Lab, Stanford) were grown in DMEM supplemented with fetal bovine serum (FBS, 10%) penicillin (10 U/mL), and streptomycin (10  $\mu$ g/mL). The cells were cultured in a water-saturated CO<sub>2</sub> (5%) incubator at 37 °C. Imaging was performed using an IVIS Lumina (Xenogen) system equipped with a heated stage (37 °C) and a cooled CCD camera. Reactions were performed in black 96-well flat-bottom plates (Grenier) with 100,000 cells per well. Luciferin (50  $\mu$ L of 2X stock in PBS, pH 7.4) was added to each well, and bioluminescence images were acquired as above.

### ***Bioluminescence imaging (in vivo)***

Pathogen free luciferase-expressing transgenic mice (B6;FVB-*Ptprc*<sup>a</sup> Tg(CAG-luc,-GFP)L2G85Chco *Thy1*<sup>a</sup>/J) or FVB mice were obtained from the Jackson Laboratory. The mice were housed in University of California, Irvine's animal care facility and provided access to food and water *ad libitum*. All procedures were approved by the Institutional Animal Care and Use Committee at UC Irvine (protocol #2011-2987 to J.A.P.). FVB mice were inoculated with luciferase-expressing DB7 cells (10<sup>6</sup>) in the right flank. Luciferin solutions were formulated using the potassium salt of the desired

luciferin and sterile PBS (Dulbecco's Phosphate-Buffered Saline, ThermoFisher). Mice were anesthetized with isoflurane (2% in 1 L/min of O<sub>2</sub>), and were injected i.v. (tail vein) or i.p. (intraperitoneal) with 100  $\mu$ L of luciferin solutions. Bioluminescent images were acquired using the IVIS Lumina system (PerkinElmer). Images were acquired every minute for 15 min (10 second exposure per image). Images were analyzed using Living Image software.

### ***Bioluminescence emission spectra***

Emission spectra for D-luciferin and all analogs were recorded on a FluoroMax-4 spectrometer (Horiba Jobin-Yvon). Luciferin (10  $\mu$ L of an 10 mM solution in bioluminescence buffer, pH 7-9) and Fluc (10  $\mu$ L of a 1 mg/mL solution in bioluminescence buffer) along with coenzyme A (5  $\mu$ L of a 100 mM solution) were placed in a 10 mm path length quartz cuvette (1 mL total volume). Emission data were collected over 450-750 nm (1 nm intervals) at room temperature. The acquisition times were 0.1 s/wavelength. The spectra were then normalized to D-luciferin and plotted.

### ***General chemiluminescence procedure***

Phenyl esters of each luciferin analog were prepared following the basic procedure of Kim *et al.*<sup>[3]</sup> In brief, the potassium salt of each luciferin (6.0  $\mu$ mol) was added to an oven-dried, two-dram vial containing a small stir bar. Deuterated dimethylsulfoxide (0.55 mL) containing a mesitylene internal standard (0.275  $\mu$ L) was then added, and the luciferin was dissolved with stirring (5 min). Phenylchloroformate (0.76  $\mu$ L, 6.0  $\mu$ mol) was subsequently added, and a brief color change was observed in



most cases. The solutions were stirred for an additional 5 min. A portion of each solution (5  $\mu\text{L}$ ) was reserved, and the remainder was added to an NMR tube for analysis. The NMR sample was kept at ambient temperature until luminometer measurements were acquired (see below). At that point, the NMR sample was frozen ( $-73\text{ }^{\circ}\text{C}$ ) to preserve the contents of the tube. At a later time, the tube was thawed and a  $^1\text{H}$  NMR spectrum was immediately acquired (2 scans, 20 s relaxation delay). The concentration of the luciferin phenyl ester was determined via comparison to the internal standard (Figure S2).

The reserved portion of each luciferin ester solution was diluted to 0.5 mL with anhydrous DMSO, and 50  $\mu\text{L}$  of this solution was added to six wells of a black 96-well flat-bottom plate (Greiner). Chemiluminescence values were acquired on a Tecan Infinite F200 PRO plate-reading luminometer. Data were acquired for 1.5 s prior to injection of potassium phenoxide solution (50  $\mu\text{L}$  of a 0.1 M solution). The phenoxide solution was prepared via dissolution of potassium *tert*-butoxide (112 mg) and phenol (94 mg) in anhydrous dimethylsulfoxide (10 mL) with stirring (30 min). The total volume in each well was 100  $\mu\text{L}$ . After the addition of base, luminescence data were collected for an additional 50 s (100 ms integration times were used). Relative luminescence yields were determined via trapezoidal integration of the data (Figure S2).

### ***Synthetic experimental procedures***

All reactions were performed in flame- or oven-dried glassware under positive pressure of nitrogen or argon unless otherwise noted. Dichloromethane, dimethylacetamide, *N,N*-dimethylformamide, triethylamine, and toluene were dried by columns packed with activated alumina on a solvent purification system. Anhydrous pyridine and DMSO were purchased from Acros Organics in AcroSeal™ bottles. All reagents were used as purchased without further purification. 4,5-Dichloro-1,2,3-dithiazol-1-ium chloride (Appel's salt) was synthesized according to a published procedure<sup>[4]</sup> and stored in a desiccator. Thin layer chromatography (TLC) was performed on Merck 60 F<sub>254</sub> pre-coated silica gel plates, and TLC plates were visualized with UV light and ninhydrin stain when appropriate. Flash-column chromatography was performed using silica gel (60 Å, 230-240 mesh, Merck KGA). NMR spectra were recorded with Bruker Advanced spectrometers using deuterated solvents. <sup>1</sup>H NMR spectra were recorded at 400 or 500 MHz as indicated. <sup>13</sup>C NMR spectra were recorded at 125 MHz. <sup>1</sup>H NMR data are reported in the following order: chemical shift (δ ppm), multiplicity, coupling constant (Hz), and integration. <sup>13</sup>C NMR data are reported in terms of chemical shift. Infrared spectra were recorded using a Thermo Scientific iD5 ATR infrared spectrophotometer. High-resolution mass spectra were obtained from the UC Irvine Mass Spectrometry Facility. The abbreviations used can be found in the document *JOC Standard Abbreviations and Acronyms*.

## Synthetic procedures

### 3-Bromo-4-isopropoxyaniline (S1)

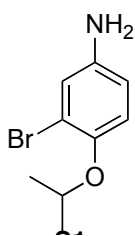

Following the general method of Shen and Driver,<sup>[5]</sup> to a flask containing 2-bromo-1-isopropoxy-4-nitrobenzene<sup>[6]</sup> were added iron filings (0.15 g, 560  $\mu\text{mol}$ ), acetone (3 mL) and water (10 mL). Glacial acetic acid (1 mL) was then added, and the mixture was heated at reflux for 3 h. The mixture was then diluted with ethyl acetate (20 mL) and washed with saturated sodium carbonate (2 x 20 mL), ammonium chloride (2 x 20 mL), and brine (1 x 20 mL). The organic layer was then dried with  $\text{MgSO}_4$ , filtered, and concentrated *in vacuo*. The residue was purified *via* flash-column chromatography (eluting with 8:2 hexanes:ethyl acetate) to yield **S1** (72 mg, 57%) as a brown oil. The spectra matched those reported previously.<sup>[7]</sup>

### 2,6-Dibromo-4-isopropoxyaniline (1)

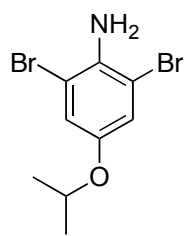

Following the general procedure of Popeney and Guan,<sup>[8]</sup> to a solution of 4-isopropoxy aniline (1.20 g, 7.90 mmol) in  $\text{CH}_2\text{Cl}_2$  (66 mL) and methanol (22 mL) was added calcium carbonate (3.03 g, 30.0 mmol), followed by benzyltrimethylammonium tribromide (6.53 g, 16.0 mmol). The reaction was stirred at room temperature for 2 h. The reaction was then quenched with 1 M  $\text{Na}_2\text{S}_2\text{O}_3$  and washed with 1 M  $\text{Na}_2\text{S}_2\text{O}_3$  (2 x 100 mL), water (2 x 100 mL) and brine (1 x 100 mL). The organic layer was dried with  $\text{MgSO}_4$ , then filtered and concentrated *in vacuo*. The crude material was purified by flash-column chromatography (eluting with 8:2 hexanes:ethyl acetate) to afford **1** (1.0 g, 43%) as an orange oil.  $^1\text{H}$  NMR (400 MHz,  $\text{CDCl}_3$ )  $\delta$  7.03 (s, 2H), 4.34 (septet,  $J = 6.1$  Hz, 1H), 1.29 (d,  $J = 6.1$

Hz, 6H);  $^{13}\text{C}$  NMR (500 MHz,  $\text{CDCl}_3$ )  $\delta$  150.2, 136.4, 120.9, 109.0, 72.0, 22.0; HRMS (CI)  $m/z$  calcd for  $\text{C}_9\text{H}_{12}\text{Br}_2\text{NO}$   $[\text{M}+\text{H}]^+$  309.9265, found 309.9274.

**Representative procedure for the synthesis of Appel's salt adducts (2, 4, 6)**

**(Z)-2,6-Dibromo-N-(4-chloro-5H-1,2,3-dithiazol-5-ylidene)-4-isopropoxyaniline (2)**

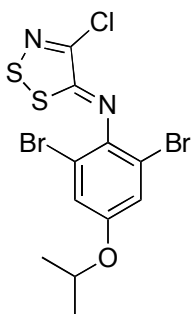

Following the general method of Michaelidou and Koutentis,<sup>[9]</sup> to a flask of **1** (0.94 g, 3.3 mmol) under argon was added Appel's salt (0.83 g, 4.0 mmol), followed by anhydrous  $\text{CH}_2\text{Cl}_2$  (15 mL) and anhydrous pyridine (0.59 mL, 7.3 mmol). The reaction mixture was stirred at room temperature for 2 h, then loaded onto silica gel and purified *via* flash-column chromatography (eluting with 8:2 hexanes:ethyl acetate). Compound **2** (1.3 g, 91%) was isolated as a brown oil.  $^1\text{H}$  NMR (400 MHz,  $\text{DMSO}-d_6$ )  $\delta$  7.33 (s, 2H), 4.66 (septet,  $J = 6.0$  Hz, 1H), 1.23 (d,  $J = 6.0$  Hz, 6H);  $^{13}\text{C}$  NMR (500 MHz,  $\text{CDCl}_3$ )  $\delta$  164.8, 155.8, 146.7, 142.8, 120.3, 113.6, 71.3, 22.0; HRMS (ESI-TOF)<sup>+</sup>  $m/z$  calcd for  $\text{C}_{11}\text{H}_{10}\text{Br}_2\text{ClN}_2\text{OS}_2$   $[\text{M}+\text{H}]^+$  442.8290, found 442.8295.

**(Z)-3-Bromo-N-(4-chloro-5H-1,2,3-dithiazol-5-ylidene)-4-isopropoxyaniline (4)**

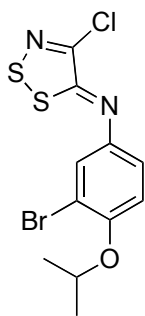

Compound **4** was isolated as a brown oil (0.92 g, 87%).  $^1\text{H}$  NMR (400 MHz,  $\text{DMSO}-d_6$ )  $\delta$  7.52, (s, 1H), 7.28 (s, 2H), 4.72 (septet,  $J = 4.8$  Hz, 1H), 1.34 (d,  $J = 4.8$  Hz, 6H);  $^{13}\text{C}$  NMR (500 MHz,  $\text{CDCl}_3$ )  $\delta$  159.2, 152.5, 147.5, 144.5, 125.2, 121.0, 116.6, 113.3, 72.1, 22.3; HRMS (CI)  $m/z$  calcd for  $\text{C}_{11}\text{H}_{11}\text{BrClN}_2\text{OS}_2$   $[\text{M}+\text{H}]^+$  364.9185, found 364.9189.

**(Z)-N-(4-chloro-5H-1,2,3-dithiazol-5-ylidene)-4-isopropoxyaniline (6)**

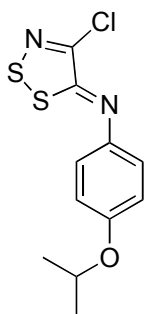

Compound **6** was isolated as a brown oil (2.84 g, 99%). <sup>1</sup>H NMR (400 MHz, DMSO-*d*<sub>6</sub>) δ 7.20 (d, *J* = 8.9 Hz, 2H), 7.01 (d, *J* = 8.9 Hz, 2H), 4.61 (septet, *J* = 6.0 Hz, 1H), 1.25 (d, *J* = 6.0 Hz, 6H); <sup>13</sup>C NMR (500 MHz, DMSO-*d*<sub>6</sub>) δ 156.6, 156.4, 147.8, 142.9, 122.3, 116.9, 70.0, 22.3; HRMS (ESI-TOF)<sup>+</sup> *m/z* calcd for C<sub>11</sub>H<sub>12</sub>ClN<sub>2</sub>OS<sub>2</sub> [M+H]<sup>+</sup> 287.0080,

found 287.0084.

***Representative procedure for the fragmentation and cyclization of Appel's salt adducts***

**(3, 5, 8)**

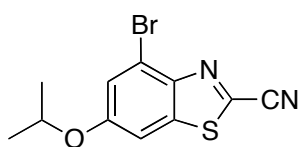

**4-Bromo-6-isopropoxybenzo[*d*]thiazole-2-carbonitrile (3)**

Following the general procedure of Micaelidou and Koutentis,<sup>[9]</sup> a flask containing **2** (0.28 g, 640 μmol) was flushed with dry nitrogen and charged with CH<sub>2</sub>Cl<sub>2</sub> (5 mL). The flask was cooled to 0 °C in an ice bath and DBU (0.29 mL, 1.9 mmol) was added. The reaction mixture was stirred for 5 min, then adsorbed to silica gel. The adsorbed material was rinsed with hexanes, and then eluted with 7:3 hexanes:ethyl acetate. The isolated thioamide was used immediately in the next reaction. (Note: this compound degrades quickly).

Following the general procedure of Inamoto and coworkers,<sup>[10]</sup> to a flask containing (2,6-dibromo-4-isopropoxyphenyl)carbamothioyl cyanide (0.24 g, 640 μmol based on crude yield from previous step), was added palladium(II) chloride (11 mg, 64 μmol), copper(I) iodide (60 mg, 320 μmol), and tetrabutyl ammonium bromide (0.43 g,

1.3 mmol). The flask was flushed with dry nitrogen, and then DMF (8 mL) and DMSO (8 mL) were added. The reaction was heated at 125 °C for 2 h. The mixture was then diluted with ethyl acetate (40 mL) and washed with 1 M NaHSO<sub>4</sub> (1 x 40 mL), water (3 x 40 mL), ammonium chloride (1 x 40 mL) and brine. The organic layers were combined and then dried with MgSO<sub>4</sub>, and concentrated *in vacuo*. The concentrate was purified via flash-column chromatography (eluting with 9:1 hexanes:ethyl acetate) to yield **3** (33 mg, 6.7% over two steps) as a brown solid. <sup>1</sup>H NMR (400 MHz, CDCl<sub>3</sub>) δ 7.45, (d, *J* = 2.3 Hz, 1H), 7.29 (d, *J* = 2.3 Hz, 1H), 4.64 (septet, *J* = 6.0 Hz, 1H), 1.40 (d, *J* = 6.0 Hz, 6H); <sup>13</sup>C NMR (500 MHz, CDCl<sub>3</sub>) δ 159.0, 145.2, 137.7, 133.6, 122.9, 119.2, 112.8, 104.3, 71.7, 21.9; HRMS (ESI-TOF)<sup>+</sup> *m/z* calcd for C<sub>11</sub>H<sub>10</sub>BrN<sub>2</sub>OS [M+H]<sup>+</sup> 350.9779, found 350.9783.

#### 5-Bromo-6-isopropoxybenzo[d]thiazole-2-carbonitrile (**5**)

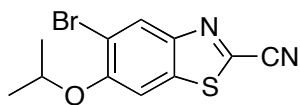

Compound **5** was isolated as a brown solid (79 mg, 4%). <sup>1</sup>H NMR (400 MHz, CDCl<sub>3</sub>) δ 8.40 (s, 1H), 7.36 (s, 1H), 4.69 (septet, *J* = 6.0 Hz, 1H), 1.47, (d, *J* = 6.0 Hz, 6H); <sup>13</sup>C NMR (500 MHz, CDCl<sub>3</sub>) δ 155.2, 146.9, 136.1, 134.4, 129.3, 115.9, 113.0, 104.4, 73.0, 21.8; HRMS (CI) *m/z* calcd for C<sub>11</sub>H<sub>10</sub>BrN<sub>2</sub>OS [M+H]<sup>+</sup> 296.9697, found 296.9694.

#### 6-Isopropoxybenzo[d]thiazole-2-carbonitrile (**7**)

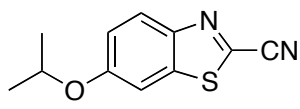

Compound **7** was isolated as a brown solid (48 mg, 3%). <sup>1</sup>H NMR (400 MHz, CDCl<sub>3</sub>) δ 8.07 (d, *J* = 9.1 Hz, 1H), 7.34 (d, *J* = 2.4 Hz, 1H), 7.20 (dd, *J* = 9.1, 2.5 Hz, 1H), 4.66 (septet, *J* = 5.3 Hz, 1H), 1.41 (d, *J* =

5.3 Hz, 1H);  $^{13}\text{C}$  NMR (500 MHz,  $\text{CDCl}_3$ )  $\delta$  158.9, 146.7, 137.5, 126.0, 119.6, 113.3, 104.9, 71.1, 21.9; HRMS (CI)  $m/z$  calcd for  $\text{C}_{11}\text{H}_{11}\text{N}_2\text{OS}$   $[\text{M}+\text{H}]^+$  236.0858, found 236.0864.

### 7-Bromo-6-isopropoxybenzo[d]thiazole-2-carbonitrile (**8**)

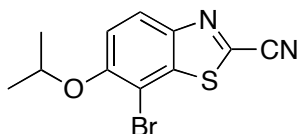

To a flask of **7** (0.13 g, 60  $\mu\text{mol}$ ) was added *N*-bromosuccinimide (0.16 g, 92  $\mu\text{mol}$ ), followed by  $\text{CH}_3\text{CN}$  (15 mL). The reaction mixture was stirred for 12 h, then extracted with ethyl acetate (30 mL). The combined organic layers were washed with water (3 x 60 mL) and brine (1 x 60 mL), then dried with  $\text{MgSO}_4$ , filtered, and concentrated *in vacuo* to yield **8** (0.14 g, 75%).  $^1\text{H}$  NMR (400 MHz,  $\text{DMSO}-d_6$ )  $\delta$  8.22 (d,  $J = 11.4$  Hz, 1H), 7.60 (d,  $J = 11.5$  Hz, 1H), 4.88 (septet,  $J = 6.0$  Hz, 1H), 1.31 (d,  $J = 6.0$  Hz, 6H);  $^{13}\text{C}$  NMR (500 MHz,  $\text{CDCl}_3$ )  $\delta$  155.3, 145.7, 134.2, 124.7, 116.4, 113.0, 103.3, 73.7, 22.2; HRMS (CI)  $m/z$  calcd for  $\text{C}_{11}\text{H}_{10}\text{BrN}_2\text{OS}$   $[\text{M}+\text{H}]^+$  296.9697, found 296.9696.

### *Representative procedure for the formation of brominated luciferins (7'-BrLuc, 4'-BrLuc, 5'-BrLuc)*

#### **(S)-2-(7-Bromo-6-hydroxybenzo[d]thiazol-2-yl)-4,5-dihydrothiazole-4-carboxylic acid (7'-BrLuc)**

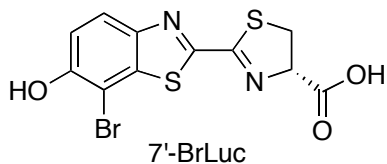

To a flask of **8** (52 mg, 18  $\mu\text{mol}$ ) was added anhydrous  $\text{CH}_2\text{Cl}_2$  (5 mL), followed by a 1.0 M solution of  $\text{BCl}_3$  in hexanes (1.06 mmol, 1.06 mL, added slowly). The mixture was stirred at room temperature under nitrogen for 24 h. The reaction was then

quenched with a saturated solution of ammonium chloride (10 mL) and extracted with ethyl acetate (30 mL). The organic layers were combined and washed with saturated ammonium chloride (2 x 30 mL) and brine (1 x 30 mL). The organic layer was then dried with MgSO<sub>4</sub>, filtered, and concentrated *in vacuo*. The concentrate was purified via flash-column chromatography (eluting with 1:1 hexanes:ethyl acetate) to yield the deprotected intermediate which was used immediately in the following step.

The isolated material (33 mg, 130 μmol, based on the crude isolated yield) was dissolved in degassed methanol (2 mL) and D-cysteine (24 mg, 140 μmol) in degassed 0.05 M phosphate buffer (pH 8.0) was added. The mixture was stirred at room temperature under nitrogen, overnight. The mixture was then acidified with 1 M NaHSO<sub>4</sub> (10 mL) and extracted with ethyl acetate (20 mL). The combined organic layers were washed with saturated ammonium chloride (2 x 20 mL) and brine (1 x 20 mL), then dried over MgSO<sub>4</sub>, filtered, and concentrated *in vacuo* to yield **7'-BrLuc** (41 mg, 65% over two steps) as a yellow solid. Note: this compound was treated with anhydrous K<sub>2</sub>CO<sub>3</sub> (1.0 equiv.) in water and lyophilized for chemiluminescence assays. <sup>1</sup>H NMR (500 MHz, D<sub>2</sub>O) δ 7.56 (d, *J* = 8.9 Hz, 1H), 6.89 (d, *J* = 8.9 Hz, 1H), 5.17 (m, 1H), 3.76 (m, 1H), 3.55 (m, 1H); <sup>13</sup>C NMR (500 MHz, D<sub>2</sub>O) δ 180.6, 168.4, 164.4, 157.0, 144.6, 142.9, 125.7, 123.4, 103.7, 82.7, 39.1. Note: high resolution mass spectrometry was not successful due to multiple fragmentation pathways.<sup>[11]</sup>

**(S)-2-(4-Bromo-6-hydroxybenzo[d]thiazol-2-yl)-4,5-dihydrothiazole-4-carboxylic acid (4'-BrLuc)**



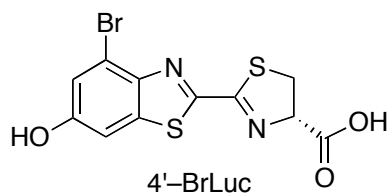

Compound **4'-BrLuc** was isolated as a yellow solid (14 mg, 17% over two steps).  $^1\text{H}$  NMR (500 MHz,  $\text{D}_2\text{O}$ )  $\delta$  7.01 (m, 2H), 5.21 (m, 1H), 3.84 (m, 1H), 3.64 (m, 1H);

$^{13}\text{C}$  NMR (500 MHz,  $\text{D}_2\text{O}$ )  $\delta$  180.4, 168.3, 169.8, 159.3, 146.7, 139.9, 123.3, 119.2, 109.0, 82.8, 39.3. Note: high resolution mass spectrometry was not successful due to multiple fragmentation pathways.<sup>[11]</sup>

**(S)-2-(5-Bromo-6-hydroxybenzo[d]thiazol-2-yl)-4,5-dihydrothiazole-4-carboxylic acid (5'-BrLuc)**

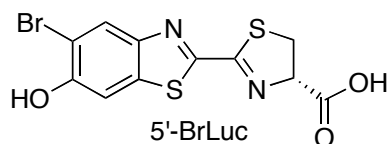

Compound **5'-BrLuc** was isolated as a yellow solid (16 mg, 36% over two steps).  $^1\text{H}$  NMR (500 MHz,  $\text{D}_2\text{O}$ )  $\delta$

7.81 (s, 1H), 7.12 (s, 1H), 5.20 (apparent t,  $J = 8.6$  Hz, 1H), 3.81 (m, 1H), 3.60 (m, 1H);  $^{13}\text{C}$  NMR (500 MHz,  $\text{D}_2\text{O}$ )  $\delta$  180.0, 168.2, 160.4, 158.8, 147.4, 139.0, 129.1, 116.2, 110.1, 82.8, 39.1. Note: high resolution mass spectrometry was not successful due to multiple fragmentation pathways.<sup>[11]</sup>

### Scheme S1: Synthesis of 6'-deoxyLuc.

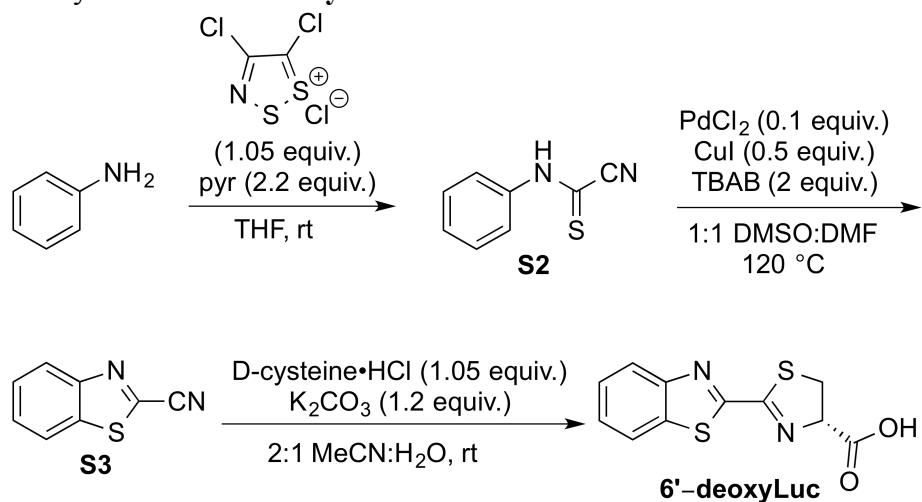

### Phenylcarbamothioyl cyanide (**S2**)

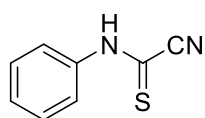

A dry, nitrogen-purged round bottom flask containing a stir bar and anhydrous tetrahydrofuran (30 mL) was charged with aniline (0.91 mL, 10 mmol), and Appel's salt (2.19 g, 10.5 mmol). The resulting solution was stirred at room temperature for 40 min and pyridine (1.66 mL, 20.5 mmol) was subsequently added. When the starting material was completely consumed (by TLC), a solution of sodium thiosulfate pentahydrate (3.2 g, 20 mmol) in 15 mL water and CH<sub>3</sub>CN (15 mL) was added. The solution was stirred, and when complete consumption of the intermediate was observed by TLC, the reaction mixture was diluted with ethyl acetate, washed with saturated NaHSO<sub>4</sub>, and dried with MgSO<sub>4</sub>. The mixture was filtered, concentrated *in vacuo* and purified by flash column chromatography (eluting with 10% ethyl acetate in hexanes) to yield **S2** (0.75 g, 46%) as a brown solid. Note: high resolution mass spectrometry was not obtained for this compound due to its multiple fragmentation pathways. <sup>1</sup>H NMR (500 MHz, CDCl<sub>3</sub>, mixture of tautomers) δ 9.51 (s, 1H), 7.78 (d, *J* = 8.3 Hz, 1H), 7.57 – 7.28 (m, 4H), 1.75 (s, 1H). <sup>13</sup>C NMR (126 MHz, CDCl<sub>3</sub>) δ 165.8, 162.0, 137.0, 136.9, 130.2, 129.5, 129.0, 128.5, 122.9, 122.6, 113.7, 112.1.

### Benzothiazole-2-carbonitrile (S3)

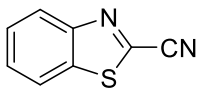

A dry, nitrogen-purged round bottom flask containing a stir bar, anhydrous DMSO (100 mL), and anhydrous DMF (100 mL) was charged with **S2** (720 mg, 4.5 mmol), palladium(II) chloride (64 mg, 0.45 mmol), copper(I) iodide (420 mg, 2.2 mmol), and tetrabutylammonium bromide (2.9 g, 9.0 mmol). The flask was fitted with a condenser and heated at 120 °C under nitrogen for 8 h. The solution was then cooled and quenched with water. Ethyl acetate was added and the layers were separated. The aqueous layer was extracted twice with ethyl acetate. The organic layers were then combined and washed with water (6 x 150 mL) and brine (2 x 100 mL). The organics were combined, and dried with MgSO<sub>4</sub>. The mixture was filtered, concentrated *in vacuo* and purified by flash column chromatography (eluting with 10% ethyl acetate in hexanes) to yield **S3** (228 mg, 32%) as a taupe solid. Spectra matched those previously reported.<sup>[12]</sup>

### 6'-deoxyLuc

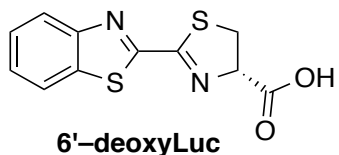

**S3** (222 mg, 1.38 mmol) was dissolved in CH<sub>3</sub>CN (6 mL) and a solution of K<sub>2</sub>CO<sub>3</sub> (228 mg, 1.70 mmol), D-cysteine hydrochloride monohydrate (252 mg, 1.50 mmol), and water (3 mL) was added dropwise with stirring. After 45 min, the volatile organics were removed *in vacuo*, and hydrochloric acid (1 M) was added until the solution was acidic. A cream colored precipitate was observed. The solid was collected by filtration, washed with water, and dried under high vacuum to afford **6'-deoxyLuc** (319 mg, 88%) as an off

white solid.  $^1\text{H}$  NMR (500 MHz,  $\text{DMSO-}d_6$ )  $\delta$  8.16 (ddd,  $J = 28.6, 7.7, 0.5$  Hz, 1H), 7.57 (dtd,  $J = 19.7, 7.4, 1.2$  Hz, 1H), 4.94 (app t,  $J = 9.0$  Hz, 1H), 3.77 (dd,  $J = 10.4, 8.2$  Hz, 1H), 3.51 (t,  $J = 10.0$  Hz, 1H).  $^{13}\text{C}$  NMR (126 MHz,  $\text{DMSO-}d_6$ )  $\delta$  169.9, 162.2, 159.4, 152.7, 135.1, 126.9, 126.9, 123.8, 122.7, 84.0, 36.3; HRMS (ESI $^+$ ) calcd for  $\text{C}_{11}\text{H}_8\text{N}_2\text{O}_2\text{S}_2\text{Na}$   $[\text{M} + \text{Na}]^+$  324.9484, found 324.9479.

**Scheme S2: Synthesis of 6'-NHMeLuc and 6'-NMe<sub>2</sub>Luc.**

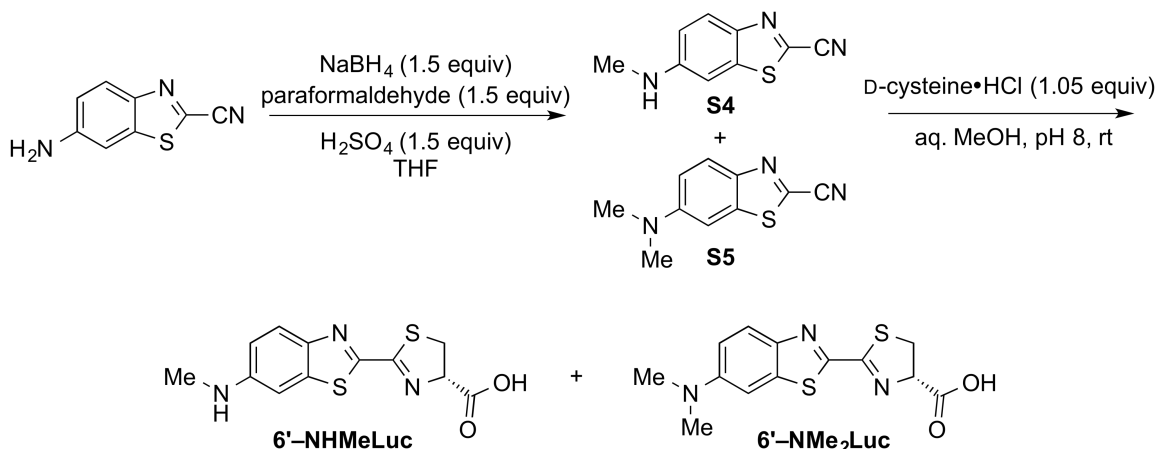

**6-(Methylamino)benzo[d]thiazole-2-carbonitrile (S4) and 6-(Dimethylamino)benzo[d]thiazole-2-carbonitrile (S5)**

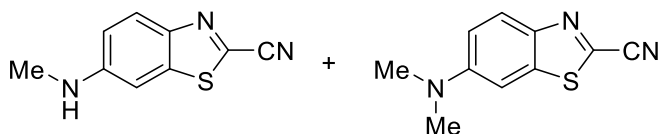

Following a previously reported procedure,<sup>[2]</sup> 6-aminobenzo[d]thiazole-2-carbonitrile (88 mg, 0.50 mmol) and

NaBH<sub>4</sub> (29 mg, 0.77 mmol) were dissolved in THF (10 mL). In a separate dried flask, paraformaldehyde (23 mg, 0.77 mmol) was suspended in dry THF (10 mL), and H<sub>2</sub>SO<sub>4</sub> (40  $\mu$ L, 0.77 mmol) was added. The two solutions were stirred separately at room temperature for 15 min. The carbonitrile solution was then added to the paraformaldehyde solution dropwise via syringe. The resulting mixture was stirred under nitrogen for 1 h, then an additional equivalent of NaBH<sub>4</sub> was added. After 1 h, the reaction mixture was basified with a 1.8 M solution of KOH (20 mL) and ethyl acetate (20 mL) was added. The layers were separated and the aqueous layer was extracted with additional ethyl acetate (2 x 10 mL). The combined organic layers were washed with

brine (1 x 20 mL), and dried over MgSO<sub>4</sub>. The mixture was then filtered and concentrated *in vacuo*. The crude material was purified by flash column chromatography (eluting with 30% ethyl acetate in hexanes) to yield a mixture of **S4** (31 mg, 33%), and **S5** (17 mg, 16%) as orange-red solids. Spectra matched those previously reported.<sup>[2]</sup>

### 6'-NHMeLuc

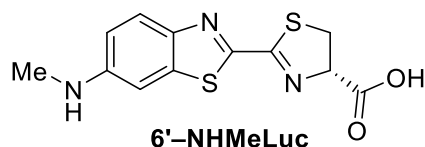

**6'-NHMeLuc** was prepared from **S4** via a previously published method.<sup>[2]</sup> Spectra matched those previously reported.<sup>[2]</sup>

### 6'-NMe<sub>2</sub>Luc

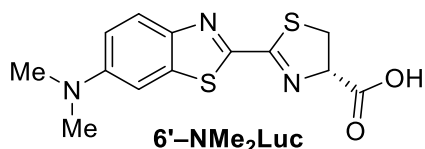

**6'-NMe<sub>2</sub>Luc** was prepared from **S5** as previously reported.<sup>[2]</sup> Spectra matched those previously reported.<sup>[2]</sup>

### Stille cross-coupling of **5** with phenyltributylstannane

The chemical structure of compound **5** is a benzothiazole derivative. It features a benzene ring with a cyano group (-CN) at the 2-position and a 4-isopropoxyphenyl group at the 5-position. The thiazole ring is fused to the benzene ring.

A 15 mL pressure tube containing lithium chloride (9 mg, 200 μmol) was flame dried under vacuum. After cooling, **5** (55.0 mg, 168 μmol), and palladium tetrakis (43 mg, 37 μmol) were added. The flask was evacuated and flushed with nitrogen, and dioxane (2.5 mL) was added against positive flow, followed by phenyltributylstannane (63 μL, 200 μmol). The mixture was heated at 120 °C for 6 h. The mixture was cooled and washed with water (3 times, 3 mL). The organics were then dried over magnesium sulfate, filtered, and

concentrated via rotary evaporation. The crude mixture was purified via preparative TLC (eluting with 30% ethyl acetate in hexanes) to provide **9** (17 mg, 31%). <sup>1</sup>H NMR (500 MHz, CDCl<sub>3</sub>) δ 7.82 – 7.77 (m, 2H), 7.55 – 7.49 (m, 2H), 7.49 – 7.43 (m, 1H), 7.31 (dd, *J* = 17.7, 3.1 Hz, 1H), 4.71 (dt, *J* = 15.1, 7.5 Hz, 1H), 1.44 (d, *J* = 7.6 Hz, 6H). <sup>13</sup>C NMR (126 MHz, CDCl<sub>3</sub>) δ 158.8, 144.8, 139.4, 138.6, 137.4, 132.5, 129.6, 128.6, 128.5, 119.2, 113.5, 104.0, 71.1, 22.0. HRMS (ESI<sup>+</sup>) calcd. for C<sub>17</sub>H<sub>14</sub>N<sub>2</sub>OSNa [M + Na]<sup>+</sup> 317.0724, found 317.0731.

## Computational Details

Density functional theory (DFT) structural optimizations of the singlet ground state  $S_0$  and the first singlet excited state ( $S_1$ ) were performed using the hybrid-GGA functional, PBE0<sup>[14]</sup> in the gas phase. Basis sets of double-zeta quality with polarization and diffuse functions<sup>[15]</sup> (def2-SVPD) were necessary to bind the additional electron of the anionic structures. Analytical force constant calculations<sup>[16]</sup> for the ground state and numerical force constant calculations were performed to verify minima by the absence of imaginary vibrational modes. Constrained excited state geometry optimizations were performed by fixing the out-of-plane bending angle of the carbon-carbon single bond connecting the two thiazoline rings to  $0^\circ$  and adjusting the torsional angle between the nitrogens in each ring. All calculations were performed with the quantum chemistry package TURBOMOLE.<sup>[17,18]</sup>

### Molecular orbitals involved in the emission of luciferin analogs.

For each luciferin analogue, we report the molecular orbitals involved in the emission “de-excitation” from the  $S_1$  excited state geometry. All orbitals are plotted with a contour value of 0.05au. The primary contribution to the excitation is a HOMO to LUMO transition that tends to have pi-pi character originating on the anionic oxygen attached to the benzothiazole with the transition dipole moment pointing towards the thiazoline motif. In the case of luciferin that are electron poor at the 6' position of the benzothiazole, e.g. **6'-deoxyLuc**, no such character is observed and corroborates the notion that an electron rich moiety is necessary for strong emission.



| Compound                                | HOMO                                                                                | LUMO                                                                                  |
|-----------------------------------------|-------------------------------------------------------------------------------------|---------------------------------------------------------------------------------------|
| <b>D-Luc</b>                            | 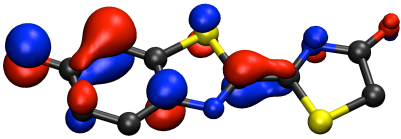   |     |
| <b>6'-aminoLuc</b>                      |    |    |
| <b>6'-MeNHLH<sub>2</sub></b>            |    |     |
| <b>6'-Me<sub>2</sub>NLH<sub>2</sub></b> |  |  |
| <b>CycLuc1</b>                          |  |  |
| <b>4'-BrLuc</b>                         |  |  |

|               |                                                                                     |                                                                                       |
|---------------|-------------------------------------------------------------------------------------|---------------------------------------------------------------------------------------|
| 5'-BrLuc      | 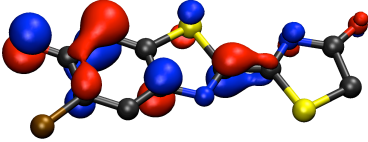   |    |
| 7'-BrLuc      |    |    |
| 6'-deoxyLuc   |    |    |
| 6'-methoxyLuc |  |  |

### Ordering of relevant spin and geometric states

In order to reconcile the differences in experimental and computational results for the brominated luciferin series, and **6'-methoxyLuc**, the ground and excited electronic states were studied in both the planar and twisted geometric states of the neutral and anionic species; both singlet and triplet states were included to help rationalize possible intruder states that may be responsible for the quenching of the chemiluminescence. Electronic states were computed at the geometry of the first singlet excited state, which was confirmed to be a

minimum by numerical frequency analysis. In the case of neutral **4'-BrLuc**, no twisted  $S_1$  minimum was found. This picture gives relative energetics of the different electronic states at the assumed emissive nuclear configuration.

For native **D-luc**, both the twisted and the planar  $S_1$  state are relatively isolated from other states. Given that our model can reasonably predict the emission strength of native luciferin, the isolated nature of the  $S_1$  state helps to establish a baseline by demonstrating that it is less probable that there is some other electronic state lower in energy that can be accessed. In the case of the anionic **7'-BrLuc**, one observes a very small separation between the planar  $S_1$  state and the twisted triplet ground state, which could account for the considerable decrease in experimentally measured emission. The planar  $S_1$  state for the other brominated luciferins seems to be modestly isolated, but there could be a distribution of protonated and deprotonated luciferin whose different accessible electronic states could cause interference. Considering **6'-methoxyLuc**, there seem to be no nearby electronic states, but there is a low-lying planar triplet state that could act as a channel for nonradiative decay. The overall environment in solution is complex compared to our model and many factors besides those described here could be in effect; however, electronic states in both the planar and twisted configurations are definitely accessible under photoexcitation and provide a reasonable explanation for the quenching of chemiluminescence.

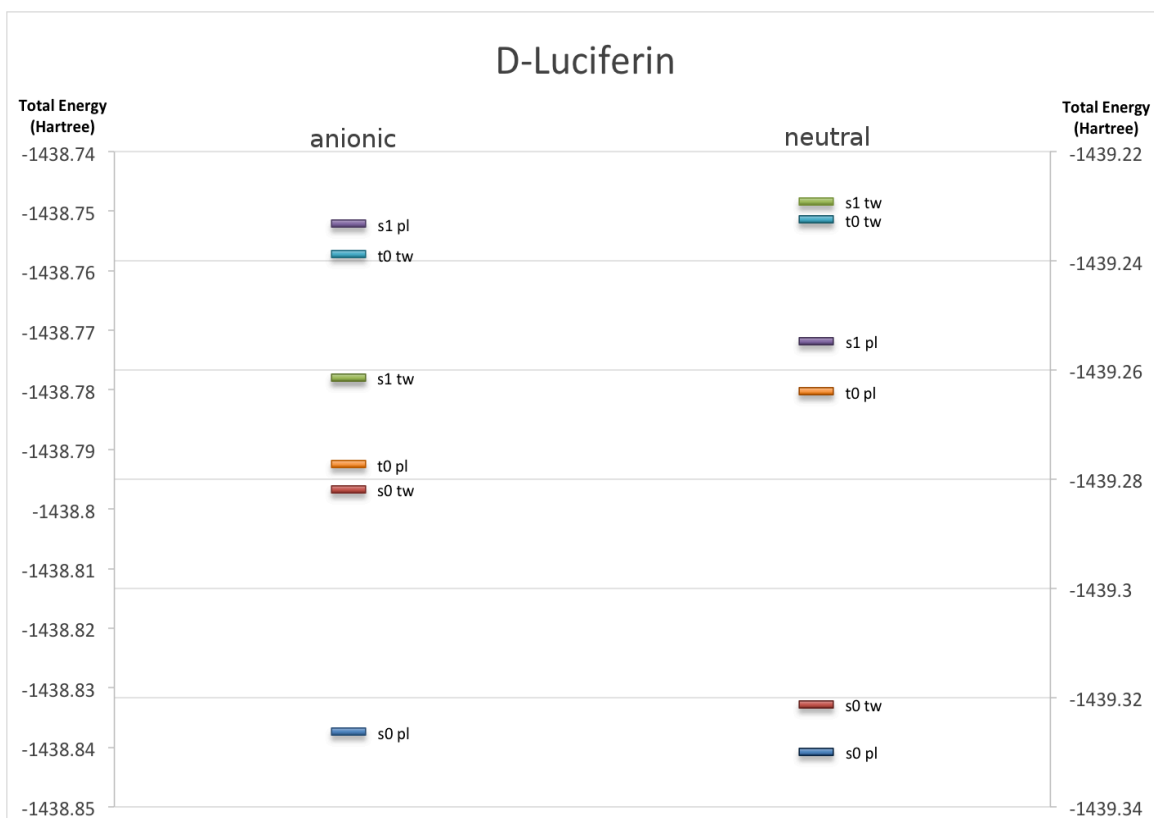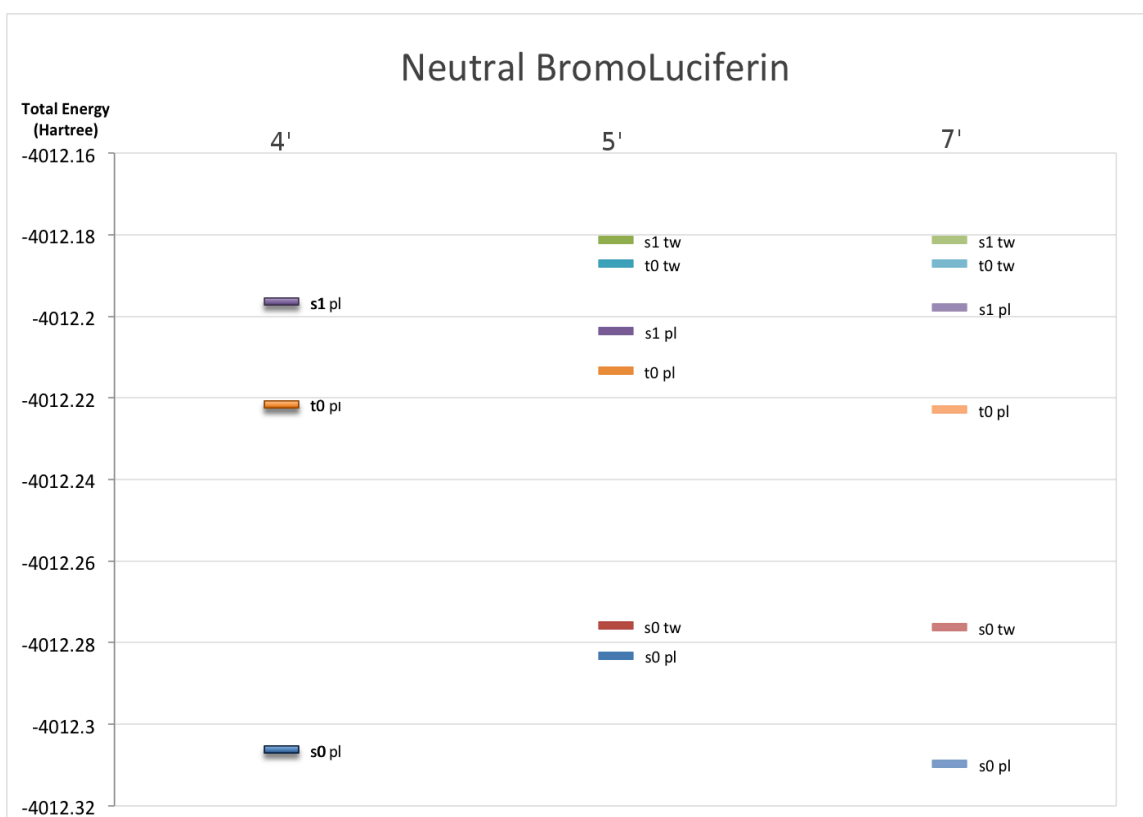

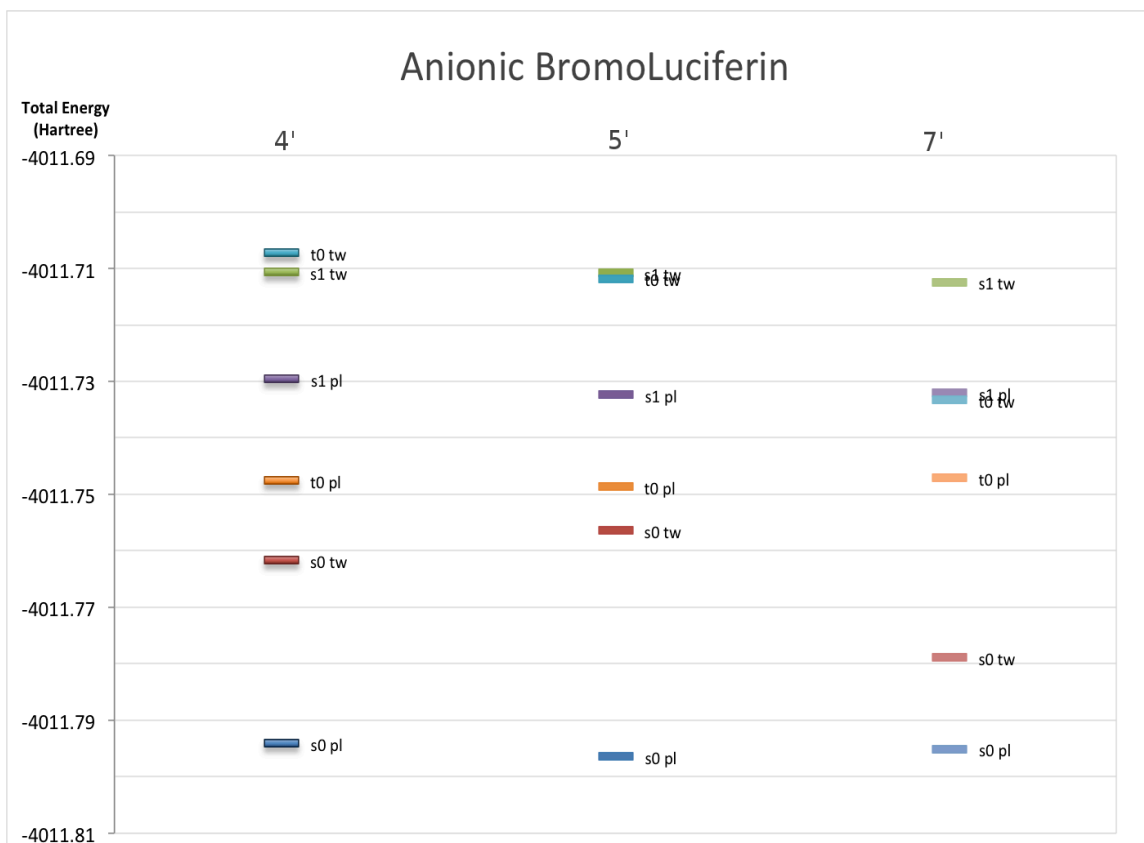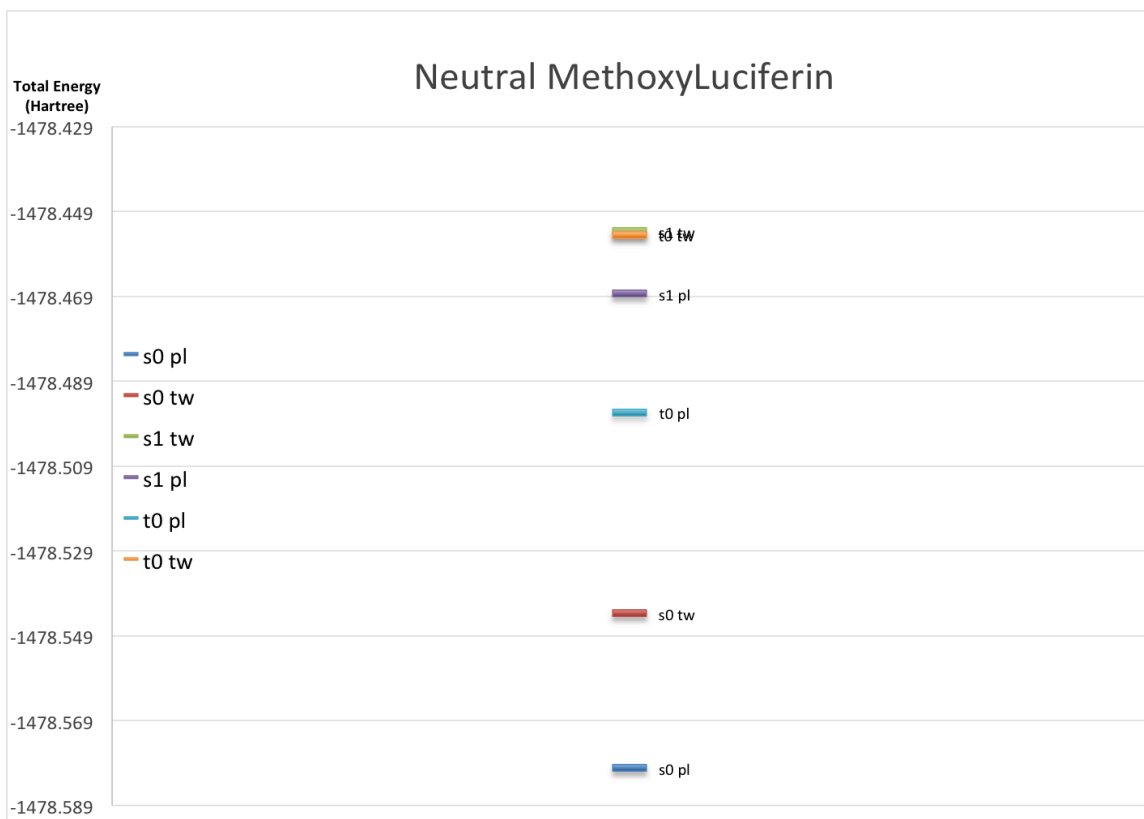

**D-Luc**

S0 Energy = -1438.843074343

C -1.2813373 4.2620165 0.9672691  
C -0.5639216 3.0090061 1.0785824  
C 0.8064982 3.0073406 1.1731258  
C 1.5866350 4.2210546 1.1679940  
C 0.8995049 5.4641204 1.0601380  
C -0.4599930 5.4801449 0.9650070  
S 1.9038716 1.6557876 1.3136942  
C 3.2596334 2.7958787 1.3508706  
N 2.9068526 4.0653135 1.2658870  
C 4.5972422 2.3599630 1.4611518  
S 5.8813591 3.5980542 1.4854097  
N 4.9702370 1.1080088 1.5469792  
C 6.3234754 0.9454358 1.6461948  
C 7.1002788 2.2773794 1.6302748  
O 6.9126056 -0.1140081 1.7399920  
O -2.5220026 4.3248825 0.8775392  
H -1.0078312 6.4213743 0.8805400  
H 1.4886068 6.3838958 1.0560990  
H -1.1523024 2.0906698 1.0827860  
H 7.7967781 2.2782298 0.7806943  
H 7.6821334 2.3670627 2.5575835

S1 Energy = -1438.837364170

C -1.3077364 4.2411522 0.9742593  
C -0.5251260 3.0144489 1.0853816  
C 0.8732071 3.0787400 1.1717981  
C 1.5811853 4.2982977 1.1571969  
C 0.8343348 5.4909973 1.0477456  
C -0.5449927 5.4702381 0.9599381  
S 1.9763984 1.7519350 1.3077014  
C 3.3014484 2.9069091 1.3384698  
N 2.9533467 4.1697306 1.2536181  
C 4.6384353 2.4025237 1.4553801  
S 5.9626301 3.5791753 1.4991833  
N 4.9516785 1.1310834 1.5337424  
C 6.2915119 0.9031962 1.6420835  
C 7.1250283 2.2021387 1.6445183  
O 6.8391147 -0.1862002 1.7311552  
O -2.5568109 4.1882638 0.8988577  
H -1.1121422 6.3987922 0.8751294  
H 1.3781167 6.4389700 1.0335322  
H -1.0664676 2.0675599 1.0986238

H 7.8317080 2.1872338 0.8022538  
H 7.7034552 2.2664248 2.5772437

**6'-aminoLuc**

S0 Energy = -1419.531486458

C -4.4714246 0.6994008 -0.0531430  
C -3.3692188 1.5614488 -0.0974595  
C -4.2658215 -0.7069461 0.0061684  
C -3.0009735 -1.2492622 0.0244840  
C -2.0921667 1.0063512 -0.0803884  
C 0.2163665 0.2382510 -0.0579573  
S -0.5584490 1.8136621 -0.1235692  
C 1.6607835 0.1366511 -0.0622214  
C 3.7786309 0.8331079 -0.1041887  
C 4.0076765 -0.6855881 -0.0437758  
S 2.3821488 -1.4681121 -0.0009116  
H 4.5888990 -0.9326787 0.8545634  
H 4.5767526 -1.0051463 -0.9269342  
N 2.4274703 1.1729047 -0.1094693  
N -0.5788406 -0.7855947 -0.0088251  
C -1.8823847 -0.3974068 -0.0192836  
H -3.5184629 2.6409029 -0.1456867  
H -2.8488274 -2.3279379 0.0711795  
H -5.1385883 -1.3622747 0.0351306  
O 4.6868831 1.6208778 -0.1420452  
N -5.7511204 1.1900916 -0.1014747  
H -5.9101560 2.1741553 0.0461581  
H -6.5173909 0.5846211 0.1462701

S1 Energy = -1419.527675377

C -4.4803789 0.6851627 -0.0178088  
C -3.3266056 1.5285508 -0.0610676  
C -4.3249978 -0.7152743 0.0290246  
C -3.0598503 -1.2789556 0.0336751  
C -2.0683707 0.9377477 -0.0550975  
C 0.2198206 0.1264484 -0.0523619  
S -0.5154815 1.7232744 -0.1001641  
C 1.6501356 0.0722123 -0.0638300  
C 3.7302659 0.8922127 -0.1104362  
C 4.0432301 -0.6194627 -0.0588742  
S 2.4601755 -1.4950325 -0.0164827  
H 4.6396163 -0.8437868 0.8364763  
H 4.6276427 -0.9073218 -0.9438741  
N 2.3864681 1.1573965 -0.1079582  
N -0.6099309 -0.9016371 -0.0076986

C -1.9050211 -0.4652489 -0.0080012  
H -3.4498270 2.6122753 -0.0984732  
H -2.9332101 -2.3617129 0.0698932  
H -5.2111955 -1.3504931 0.0610567  
O 4.6238033 1.7152787 -0.1476353  
N -5.7079766 1.2648930 -0.0238185  
H -5.8180548 2.2669642 -0.0557480  
H -6.5484712 0.7079876 0.0058242

**6'-MeNHLH<sub>2</sub>**

S0 Energy = -1458.761653271

C -4.4872976 0.6696379 -0.0489409  
C -3.3824353 1.5327374 -0.1473878  
C -4.2720884 -0.7304882 0.0981780  
C -2.9995231 -1.2591416 0.1461942  
C -2.1052672 0.9900004 -0.0985360  
C 0.2091789 0.2348838 -0.0417864  
S -0.5742369 1.8011763 -0.1969441  
C 1.6531610 0.1391059 -0.0510849  
C 3.7681740 0.8399187 -0.1370161  
C 4.0035162 -0.6744100 -0.0183228  
S 2.3812831 -1.4597322 0.0727991  
H 4.5957110 -0.8835664 0.8824064  
H 4.5639884 -1.0267934 -0.8945450  
N 2.4162632 1.1749752 -0.1482248  
N -0.5804386 -0.7877926 0.0730776  
C -1.8861072 -0.4084055 0.0475822  
H -3.5376057 2.6067408 -0.2618215  
H -2.8411273 -2.3321072 0.2603661  
H -5.1294213 -1.3979398 0.1745117  
O 4.6738481 1.6285687 -0.2099286  
N -5.7542279 1.1765487 -0.0942315  
C -6.9503067 0.3858882 -0.0248385  
H -5.8519107 2.1722670 -0.2066495  
H -7.0154443 -0.3411765 -0.8521188  
H -7.8189738 1.0492230 -0.0928716  
H -7.0241598 -0.1697600 0.9249636

S1 Energy = -1458.758090104

C -4.4940452 0.6138937 -0.0458721  
C -3.3500759 1.4627083 -0.1364094  
C -4.3265676 -0.7776759 0.0912730  
C -3.0503608 -1.3241779 0.1393935  
C -2.0836445 0.8894190 -0.0874074  
C 0.2132737 0.1040229 -0.0300020  
S -0.5432916 1.6872872 -0.1817513

C 1.6443727 0.0696163 -0.0445610  
C 3.7108312 0.9173472 -0.1637966  
C 4.0492132 -0.5815949 -0.0108331  
S 2.4807752 -1.4770004 0.1024370  
H 4.6543218 -0.7338128 0.8936643  
H 4.6333114 -0.9197773 -0.8779575  
N 2.3633530 1.1606597 -0.1676050  
N -0.6032185 -0.9254865 0.0826763  
C -1.9065876 -0.5057360 0.0515846  
H -3.4831241 2.5410358 -0.2431797  
H -2.9132055 -2.4009690 0.2454444  
H -5.1955703 -1.4295292 0.1595461  
O 4.5903845 1.7502028 -0.2662265  
N -5.7219068 1.2035500 -0.0986606  
C -6.9633152 0.4926620 -0.0284835  
H -5.7527764 2.2078640 -0.1987465  
H -7.0532381 -0.2347449 -0.8530727  
H -7.7923929 1.2032438 -0.0971100  
H -7.0519632 -0.0626493 0.9204859

**6'-Me<sub>2</sub>NLH<sub>2</sub>**

S0 Energy = -1497.990421989

C -4.4861974 0.7491604 -0.0910281  
C -3.3611606 1.5968276 -0.1029254  
C -4.2810704 -0.6653136 -0.0660703  
C -3.0199584 -1.2164225 -0.0494197  
C -2.0926843 1.0261819 -0.0865954  
C 0.2120281 0.2425126 -0.0606940  
S -0.5521773 1.8244503 -0.0965605  
C 1.6546717 0.1319701 -0.0515171  
C 3.7772472 0.8162629 -0.0572887  
C 3.9971041 -0.7046679 -0.0201194  
S 2.3667505 -1.4782345 -0.0106258  
H 4.5657277 -0.9700488 0.8810927  
H 4.5755926 -1.0121816 -0.9014106  
N 2.4291049 1.1640647 -0.0717082  
N -0.5910980 -0.7771687 -0.0435917  
C -1.8908190 -0.3788969 -0.0578753  
H -3.4715258 2.6777862 -0.1257107  
H -2.8823335 -2.2979416 -0.0301953  
H -5.1408846 -1.3315481 -0.0599715  
O 4.6912395 1.5987041 -0.0718205  
N -5.7553110 1.2633106 -0.1035751  
C -6.9004261 0.3869323 -0.1106124  
H -6.9294967 -0.2594303 0.7820583  
H -6.9190932 -0.2614487 -1.0026626

H -7.8138926 0.9887326 -0.1156257  
C -5.9470514 2.6908924 -0.1349602  
H -5.5047395 3.1446984 -1.0383141  
H -5.4994370 3.1821005 0.7455521  
H -7.0177921 2.9136213 -0.1359343

S1 Energy = -1497.987259200

C -4.4966845 0.7060184 -0.0951344  
C -3.3379064 1.5324563 -0.1030681  
C -4.3377266 -0.7006779 -0.0714968  
C -3.0750048 -1.2718974 -0.0554425  
C -2.0812256 0.9327865 -0.0856622  
C 0.2064057 0.1197652 -0.0591166  
S -0.5299475 1.7200821 -0.0907584  
C 1.6380950 0.0676805 -0.0498289  
C 3.7165129 0.8948966 -0.0549151  
C 4.0342412 -0.6157478 -0.0211218  
S 2.4534342 -1.4965669 -0.0141354  
H 4.6189543 -0.8505449 0.8791625  
H 4.6322186 -0.8879359 -0.9019022  
N 2.3720938 1.1552380 -0.0672201  
N -0.6200908 -0.9069333 -0.0462647  
C -1.9188294 -0.4680740 -0.0610814  
H -3.4222004 2.6165555 -0.1228028  
H -2.9600356 -2.3561791 -0.0384609  
H -5.2079783 -1.3521217 -0.0662337  
O 4.6074021 1.7221357 -0.0680827  
N -5.7431889 1.2882624 -0.1110534  
C -6.9170887 0.4558623 -0.1048516  
H -6.9465014 -0.1815247 0.7945456  
H -6.9379717 -0.2073221 -0.9857761  
H -7.8124491 1.0821284 -0.1182652  
C -5.8948431 2.7218790 -0.1370610  
H -5.4332203 3.1604881 -1.0369026  
H -5.4356909 3.1923887 0.7476793  
H -6.9584563 2.9718076 -0.1428581

### CycLucl

S0 Energy = -1496.809364595

C -4.5332049 0.8700070 0.1884754  
C -3.4533613 1.7437545 0.1266118  
C -4.3651522 -0.5455850 0.2133999  
C -3.1167863 -1.1115332 0.1776570  
C -2.1843145 1.1564577 0.0896171  
C 0.1120877 0.3549146 0.0035415  
S -0.6418683 1.9392121 0.0022762

C 1.5514649 0.2322211 -0.0585663  
C 3.6773770 0.8961032 -0.1735707  
C 3.8849595 -0.6267986 -0.1410293  
S 2.2501354 -1.3848422 -0.0472983  
H 4.4949910 -0.8940398 0.7320955  
H 4.4162729 -0.9430566 -1.0485217  
N 2.3340119 1.2567174 -0.1214294  
N -0.6993542 -0.6578692 0.0621271  
C -1.9952502 -0.2539636 0.1118390  
H -3.5905528 2.8247393 0.1037956  
H -2.9647913 -2.1914208 0.1969222  
O 4.5971562 1.6694522 -0.2374958  
N -5.8720096 1.1721768 0.2532084  
C -6.6725631 -0.0121654 -0.0344857  
H -6.2017164 2.0817157 -0.0338749  
C -5.7307858 -1.1718301 0.3314280  
H -6.9422776 -0.0552014 -1.1051920  
H -7.6014056 -0.0146429 0.5505426  
H -5.8687522 -2.0462145 -0.3170772  
H -5.9041856 -1.4993389 1.3695036

S1 Energy = -1496.805965042

C -4.5188303 0.8448987 0.0649123  
C -3.4057626 1.7038943 -0.0120338  
C -4.3933374 -0.5645303 0.1453505  
C -3.1441156 -1.1508470 0.1515579  
C -2.1554606 1.0885034 -0.0049445  
C 0.1249134 0.2489555 -0.0108181  
S -0.5914225 1.8572849 -0.0896190  
C 1.5596392 0.1717704 -0.0422211  
C 3.6502853 0.9576060 -0.1443735  
C 3.9407244 -0.5561388 -0.0564846  
S 2.3452184 -1.4049256 0.0351680  
H 4.5484552 -0.7654240 0.8349124  
H 4.5062645 -0.8768773 -0.9425104  
N 2.3087500 1.2431367 -0.1275050  
N -0.7045317 -0.7689543 0.0710004  
C -2.0034705 -0.3225669 0.0759388  
H -3.5234551 2.7860514 -0.0737316  
H -3.0096882 -2.2313761 0.2125619  
O 4.5534279 1.7670832 -0.2187222  
N -5.8340155 1.1946670 0.0757037  
C -6.7191482 0.0498699 0.1600770  
H -6.1648151 2.1465673 0.0261097  
C -5.7705014 -1.1687788 0.2125729  
H -7.3916321 0.0217248 -0.7129199



H -7.3574459 0.1257051 1.0554184  
H -5.9546457 -1.8571504 -0.6255961  
H -5.9152757 -1.7511800 1.1346954

#### 4'-BrLuc

S0 Energy = -4011.790393777

O -6.8448625 3.5066263 0.0000277  
C -5.7550987 2.8962422 -0.0001237  
C -4.4743511 3.5689170 -0.0003715  
C -3.3128202 2.8399157 -0.0005227  
C -3.2717813 1.3958513 -0.0004524  
C -4.5269237 0.7361945 -0.0002101  
C -5.7085744 1.4350660 -0.0000525  
S -1.6680617 3.4417652 -0.0008231  
C -1.0904728 1.7475828 -0.0008238  
N -2.0679365 0.8190991 -0.0006187  
C 0.2372386 1.4631867 -0.0010187  
S 0.7687657 -0.3190377 -0.0010166  
N 1.2835062 2.2978614 -0.0012224  
C 2.4933628 1.7402297 -0.0013884  
C 2.4823412 0.1899125 -0.0013115  
H 3.0104887 -0.1843149 0.8905541  
H 3.0102020 -0.1844092 -0.8933036  
O 3.5877124 2.3056246 -0.0015908  
H -4.4739261 4.6604285 -0.0004295  
H -6.6651359 0.9136911 0.0001339  
Br -4.5378820 -1.1629725 -0.0001056

S1 Energy = -4011.710603849723

O -6.7829107 3.6274877 -0.0000102  
C -5.7500840 2.9238810 -0.0001261  
C -4.4317689 3.5471242 -0.0003866  
C -3.2788420 2.7497812 -0.0005274  
C -3.3110194 1.3393784 -0.0004453  
C -4.5919987 0.7416342 -0.0001902  
C -5.7608189 1.4779501 -0.0000238  
S -1.6406106 3.3008724 -0.0008041  
C -1.1150913 1.6245661 -0.0007993  
N -2.0771422 0.7305339 -0.0006072  
C 0.2923759 1.3577569 -0.0010236  
S 0.8186614 -0.3320233 -0.0011378  
N 1.2191917 2.2868683 -0.0011642  
C 2.4891504 1.7898465 -0.0013885  
C 2.5314880 0.2469192 -0.0013424  
H 3.0703789 -0.1065825 0.8892589  
H 3.0702231 -0.1066770 -0.8920082

O 3.5235144 2.4402342 -0.0015856  
H -4.3849815 4.6365284 -0.0004720  
H -6.7312604 0.9838975 0.0001866  
Br -4.6826752 -1.1525073 -0.0000731

#### 5'-BrLuc

S0 Energy = -4011.801518284

O -6.7891639 3.5566622 -0.0032265  
C -5.7123659 2.9455578 -0.0020496  
C -4.4263046 3.6087163 -0.0048395  
C -3.2568236 2.8885796 -0.0034073  
C -3.2398164 1.4495888 0.0009261  
C -4.4786221 0.7552349 0.0037855  
C -5.6411938 1.4692353 0.0023466  
S -1.6061438 3.4546740 -0.0061729  
C -1.0610640 1.7704864 -0.0014388  
N -2.0314378 0.8797553 0.0018765  
C 0.3135098 1.4331837 -0.0013169  
S 0.7500242 -0.2931721 0.0036376  
N 1.2894669 2.3021346 -0.0046127  
C 2.5322110 1.7265635 -0.0037090  
C 2.4881321 0.1859963 0.0010092  
H 3.0086956 -0.1874802 0.8932456  
H 3.0074937 -0.1929026 -0.8896401  
O 3.5923193 2.3188898 -0.0062399  
H -4.4424913 4.6989112 -0.0081132  
Br -7.2975886 0.5503267 0.0061108  
H -4.4737861 -0.3346915 0.0070588

S1 Energy = -4011.796387194

O -6.7437212 3.6772546 -0.0031658  
C -5.7186254 2.9697383 -0.0018696  
C -4.3954213 3.5818131 -0.0044834  
C -3.2377910 2.7950392 -0.0030318  
C -3.2846579 1.3868124 0.0009242  
C -4.5476541 0.7623570 0.0035154  
C -5.7058689 1.5174540 0.0022117  
S -1.5935900 3.3370327 -0.0058902  
C -1.0840590 1.6554509 -0.0015344  
N -2.0491522 0.7671677 0.0016384  
C 0.3244271 1.3753295 -0.0014447  
S 0.8310340 -0.3204403 0.0041211  
N 1.2604039 2.2930692 -0.0052328  
C 2.5258156 1.7815085 -0.0041678  
C 2.5505003 0.2384339 0.0013366  
H 3.0856052 -0.1180970 0.8930933

H 3.0847145 -0.1245141 -0.8883520  
O 3.5668260 2.4206560 -0.0070476  
H -4.3611156 4.6716393 -0.0076101  
Br -7.3876280 0.6456411 0.0056586  
H -4.5949914 -0.3270960 0.0065609

### 7'-BrLuc

S0 Energy = -4011.759897560

O -6.8117381 3.4595796 0.0029335  
C -5.7216478 2.8707448 0.0013385  
C -4.4348731 3.5452103 0.0045764  
C -3.2531015 2.8403188 0.0026474  
C -3.2340551 1.4008789 -0.0027133  
C -4.4737326 0.7034700 -0.0060358  
C -5.6422345 1.4048733 -0.0040951  
S -1.6157756 3.4241695 0.0058077  
C -1.0583751 1.7446135 -0.0001276  
N -2.0207710 0.8437951 -0.0040662  
C 0.3182677 1.4165633 -0.0005116  
S 0.7643403 -0.3082045 -0.0066373  
N 1.2897944 2.2900858 0.0033428  
C 2.5355001 1.7211731 0.0020153  
C 2.4996733 0.1802397 -0.0037318  
H 3.0212415 -0.1961605 0.8866843  
H 3.0223923 -0.1895294 -0.8962514  
O 3.5926833 2.3185410 0.0048960  
Br -4.4145662 5.4330358 0.0116693  
H -4.4573940 -0.3881333 -0.0100862  
H -6.6069278 0.8930852 -0.0065650

S1 Energy = -4011.795056788

O -6.7843515 3.5880324 0.0033296  
C -5.7447304 2.9044070 0.0014106  
C -4.4133815 3.5294764 0.0045355  
C -3.2306306 2.7536740 0.0023402  
C -3.2794805 1.3475690 -0.0029263  
C -4.5444281 0.7235825 -0.0060107  
C -5.7124689 1.4607122 -0.0039673  
S -1.5979460 3.3016099 0.0053605  
C -1.0783132 1.6198572 -0.0006018  
N -2.0425238 0.7318175 -0.0044872  
C 0.3286271 1.3500736 -0.0007245  
S 0.8529965 -0.3429053 -0.0066833  
N 1.2604692 2.2750099 0.0033161  
C 2.5278859 1.7751634 0.0022345  
C 2.5671773 0.2317636 -0.0034626

H 3.1050927 -0.1254000 0.8863331  
H 3.1061519 -0.1188499 -0.8952208  
O 3.5658623 2.4214073 0.0053212  
Br -4.3248798 5.3856081 0.0115190  
H -4.5783246 -0.3683564 -0.0101170  
H -6.6841035 0.9640973 -0.0064089

### 6'-deoxyLuc

S0 Energy = -1364.262556246

C -3.8887853 0.5411853 0.0180407  
C -3.9813083 -0.8641396 0.0333510  
C -2.8472751 -1.6632313 0.0353918  
H -4.9657325 -1.3351363 0.0428777  
C -2.6586667 1.1731746 0.0050638  
H -4.8026377 1.1368910 0.0154811  
C -1.4949478 0.3864087 0.0077234  
H -2.5681963 2.2595490 -0.0081928  
C -1.6014809 -1.0284963 0.0224105  
H -2.9301269 -2.7502593 0.0459045  
N -0.2139126 0.8614673 -0.0042680  
S -0.0171715 -1.7323308 0.0190287  
C 0.6414379 -0.1116984 -0.0006608  
C 2.0829149 0.0893377 -0.0129804  
S 2.6897696 1.7383480 -0.0324891  
N 2.9128232 -0.8948249 -0.0102107  
C 4.3652767 1.0675144 -0.0392240  
C 4.2416239 -0.4637484 -0.0226020  
H 4.9265511 1.3996161 0.8443366  
H 4.9118806 1.3813354 -0.9385757  
O 5.1979637 -1.1909620 -0.0204063

S1 Energy = -1364.230020612

C -3.8559532 0.5712146 0.0087144  
C -3.9801107 -0.8276326 -0.0767330  
C -2.8552328 -1.6466446 -0.0950343  
H -4.9723293 -1.2785667 -0.1279337  
C -2.6136292 1.1765583 0.0796964  
H -4.7565146 1.1873864 0.0202942  
C -1.4550570 0.3728865 0.0672685  
H -2.5053782 2.2595641 0.1460202  
C -1.6012735 -1.0435992 -0.0229363  
H -2.9574920 -2.7302281 -0.1616933  
N -0.1826011 0.8234438 0.1372677  
S -0.0334010 -1.7961254 -0.0189254  
C 0.6835525 -0.1825684 0.0994154  
C 2.0575145 0.0104766 0.1765614

S 2.7004163 1.6696698 0.3979463  
N 3.0050565 -0.9447297 0.1866544  
C 4.2720697 1.0967426 -0.1928708  
C 4.2224603 -0.4725259 0.1487035  
H 5.1188655 1.6225679 0.2616548  
H 4.3679470 1.0850764 -1.2904330  
O 5.3410903 -0.9529663 0.2563626

**6'-methoxyLuc**

S0 Energy = -1478.585905861  
C -1.9457970 4.8111594 0.6845139  
C -0.6014930 5.0305282 0.4054565  
C -2.5278098 3.6288309 0.2233707  
C -1.7700652 2.6829162 -0.5062453  
C -0.4334305 2.9108234 -0.7785140  
C 0.1743274 4.0905754 -0.3264205  
H -2.2352423 1.7647298 -0.8604312  
S 0.3912284 6.3856428 0.8378426  
N 1.4763897 4.4471802 -0.5197342  
C 1.7296041 5.5970213 0.0209326  
C 3.0327088 6.2358887 -0.0217056  
N 3.2560264 7.3808234 0.5256109  
S 4.3402938 5.4041219 -0.8533971  
C 5.4209665 6.7867227 -0.4324256  
C 4.5770564 7.7980662 0.3590192  
H 5.8164506 7.2677286 -1.3369697  
H 6.2664107 6.4530192 0.1838765  
O 5.0296732 8.8297438 0.7783827  
H 0.1572773 2.1868500 -1.3402255  
H -2.5554427 5.5199750 1.2436690  
O -3.8308072 3.4632503 0.5189803

C -4.4987251 2.3008076 0.0942555  
H -5.5301848 2.3930159 0.4477822  
H -4.0472212 1.3953547 0.5305478  
H -4.4999112 2.2162513 -1.0043316

S1 Energy = -1478.580085938

C -1.8830714 4.7861949 0.6530733  
C -0.5388785 4.9784218 0.3602200  
C -2.5226898 3.5843639 0.1975980  
C -1.8064591 2.6305781 -0.5233447  
C -0.4547536 2.8521572 -0.8025455  
C 0.2029577 4.0230497 -0.3696471  
H -2.2836720 1.7170192 -0.8717882  
S 0.4740507 6.3254358 0.7825550  
N 1.5078183 4.3379954 -0.5857000  
C 1.8023033 5.5113490 -0.0448518  
C 3.0585498 6.1795059 -0.0584263  
N 3.2276935 7.3498519 0.5172052  
S 4.4434269 5.4342124 -0.8657924  
C 5.4314980 6.8726580 -0.3890814  
C 4.5033062 7.8273186 0.3954081  
H 5.8282793 7.3874346 -1.2750250  
H 6.2774763 6.5748132 0.2457066  
O 4.9219653 8.8806493 0.8346122  
H 0.1181310 2.1142760 -1.3659913  
H -2.4780628 5.5069822 1.2143548  
O -3.8099637 3.4991991 0.5308661  
C -4.5550478 2.3653572 0.1431859  
H -5.5683465 2.5186056 0.5234362  
H -4.1262099 1.4509222 0.5814733  
H -4.5780176 2.2726754 -0.9536606

## References

- [1] D. C. McCutcheon, M. A. Paley, R. C. Steinhardt, J. A. Prescher, *J. Am. Chem. Soc.* **2012**, *134*, 7604–7607.
- [2] G. R. Reddy, W. C. Thompson, S. C. Miller, *J. Am. Chem. Soc.* **2010**, *132*, 13586–13587.
- [3] S. Kim, J. I. Lee, Y. C. Kim, *J. Org. Chem.* **1985**, *50*, 560–565.
- [4] R. Appel, H. Janssen, M. Siray, F. Knoch, *Chemische Berichte* **1985**, *118*, 1632–1643.
- [5] M. Shen, T. G. Driver, *Org. Lett.* **2008**, *10*, 3367–3370.
- [6] D. A. Patrick, M. A. Ismail, R. K. Arafa, T. Wenzler, X. Zhu, T. Pandharkar, S. K. Jones, K. A. Werbovetz, R. Brun, D. W. Boykin, R. R. Tidwell, *J. Med. Chem.* **2013**, *56*, 5473–5494.
- [7] D. Rix, H. Clavier, Y. Coutard, L. Gulajski, K. Grela, M. Mauduit, *J. Organomet Chem* **2006**, *691*, 5397–5405.
- [8] C. Popeney, Z. Guan, *Organometallics* **2005**, *24*, 1145–1155.
- [9] S. S. Michaelidou, P. A. Koutentis, *Synthesis* **2009**, 4167–4174.
- [10] K. Inamoto, C. Hasegawa, K. Hiroya, T. Doi, *Org. Lett.* **2008**, *10*, 5147–5150.
- [11] Y. Oba, N. Yoshida, S. Kanie, M. Ojika, S. Inouye, *PLoS ONE* **2013**, *8*, e84023.
- [12] H.-Q. Do, O. Daugulis, *Org. Lett.* **2010**, *12*, 2517–2519.
- [13] Adam F Littke, A. Lothar Schwarz, G. C. Fu, *J. Am. Chem. Soc.* **2002**, *124*, 6342–6348.
- [14] J. P. Perdew, M. Ernzerhof, K. Burke, *J. Chem. Phys.* **1996**, *105*, 9982–9985.
- [15] D. Rappoport, F. Furche, *J. Chem. Phys.* **2010**, *133*, 134105.
- [16] R. Bauernschmitt, R. Ahlrichs, *Chem. Phys. Lett.* **1996**, *256*, 454–464.
- [17] F. Furche, R. Ahlrichs, C. Hättig, W. Klopper, M. Sierka, F. Weigend, *WIREs Comput Mol Sci* **2013**, *4*, 91–100.
- [18] T. GmbH, *TURBOMOLE V6.2 2010, a development of University of Karlsruhe and Forschungszentrum Karlsruhe GmbH, 1989-2007, TURBOMOLE GmbH, since 2007; available from <http://www.turbomole.com>.*

1H spectrum

ppm

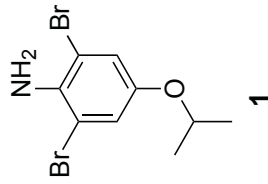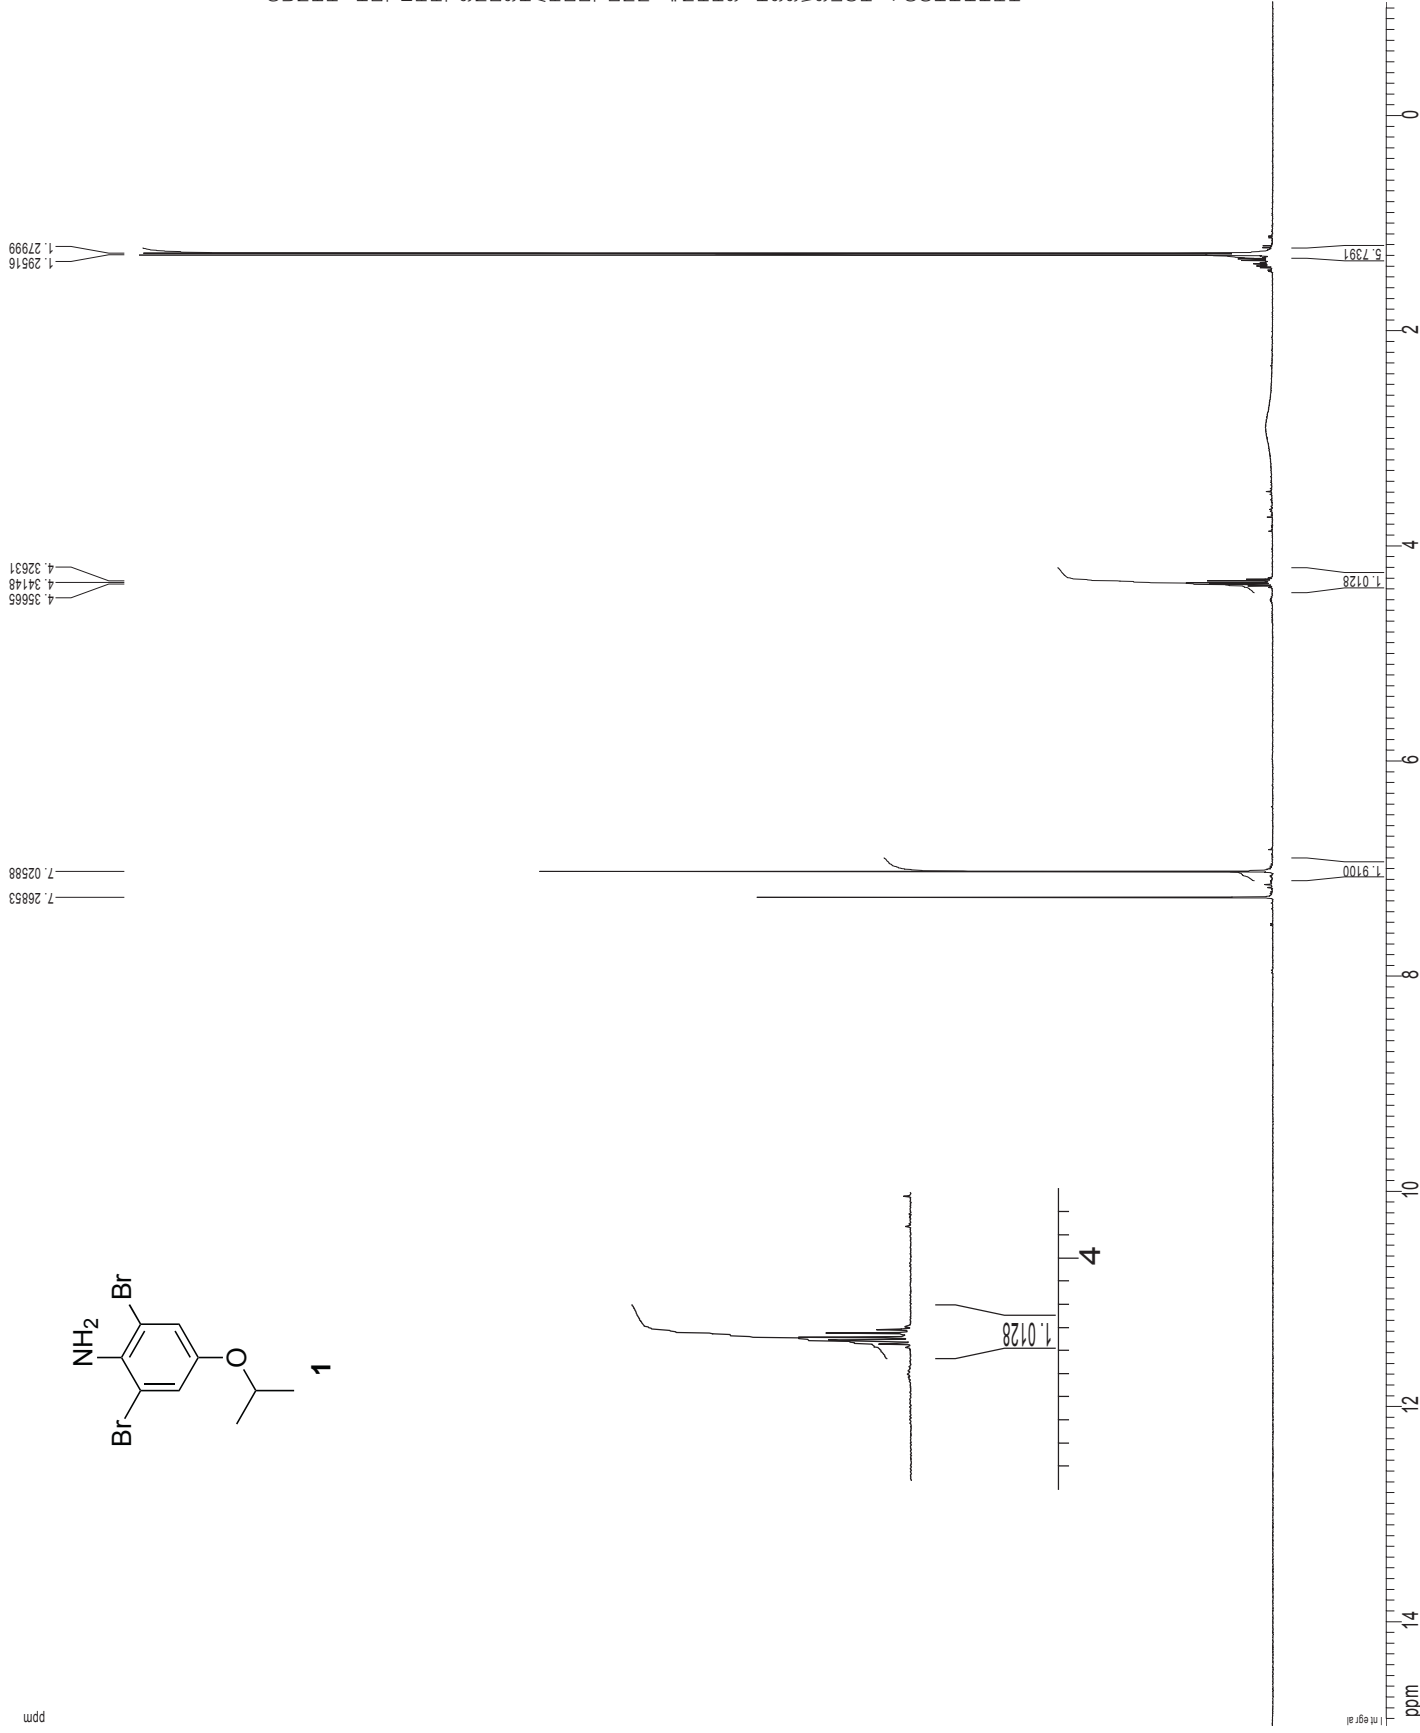

Current Data Parameters  
 User: jarchie  
 Name: RB152\_1172  
 ExpNo: 2  
 Procd: 1

F2 - Acquisition Parameters  
 Date\_: 20140603  
 Time: 12.15  
 INSTRUM: drx400  
 PRBHD: 5 mm QNP H/F/P  
 PULPROG: zg30  
 TD: 65536  
 SOLVENT: CDCl3  
 DS: 2  
 SS: 2  
 SFO1: 6410.256 Hz  
 FIDRES: 0.092813 Hz  
 AQ: 5.1118579 sec  
 RG: 812.7  
 DW: 78.000 usec  
 DE: 4.50 usec  
 TE: 288.0 K  
 D1: 0.1000000 sec  
 MPREST: 0.0000000 sec  
 MWRK: 0.0150000 sec

===== CHANNEL f1 =====  
 NUC1: 1H  
 P1: 12.00 usec  
 PL1: 0.00 dB  
 SFO1: 400.1328009 MHz

F2 - Processing parameters  
 SI: 65536  
 SF: 400.1300775 MHz  
 SSB: 0  
 EM: 0  
 LB: 0.30 Hz  
 GB: 0  
 PC: 2.00

1D NMR plot parameters  
 CX: 22.80 cm  
 CY: 15.00 cm  
 F1: 14.966 ppm  
 F1: 5888.51 Hz  
 F2: -1.054 ppm  
 F2: -421.74 Hz  
 PPMCM: 0.70265 ppm/cm  
 HZCM: 281.15168 Hz/cm

Z-restored spin-echo 13C spectrum with 1H decoupling

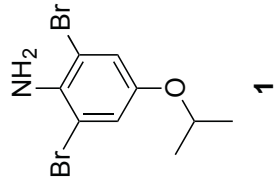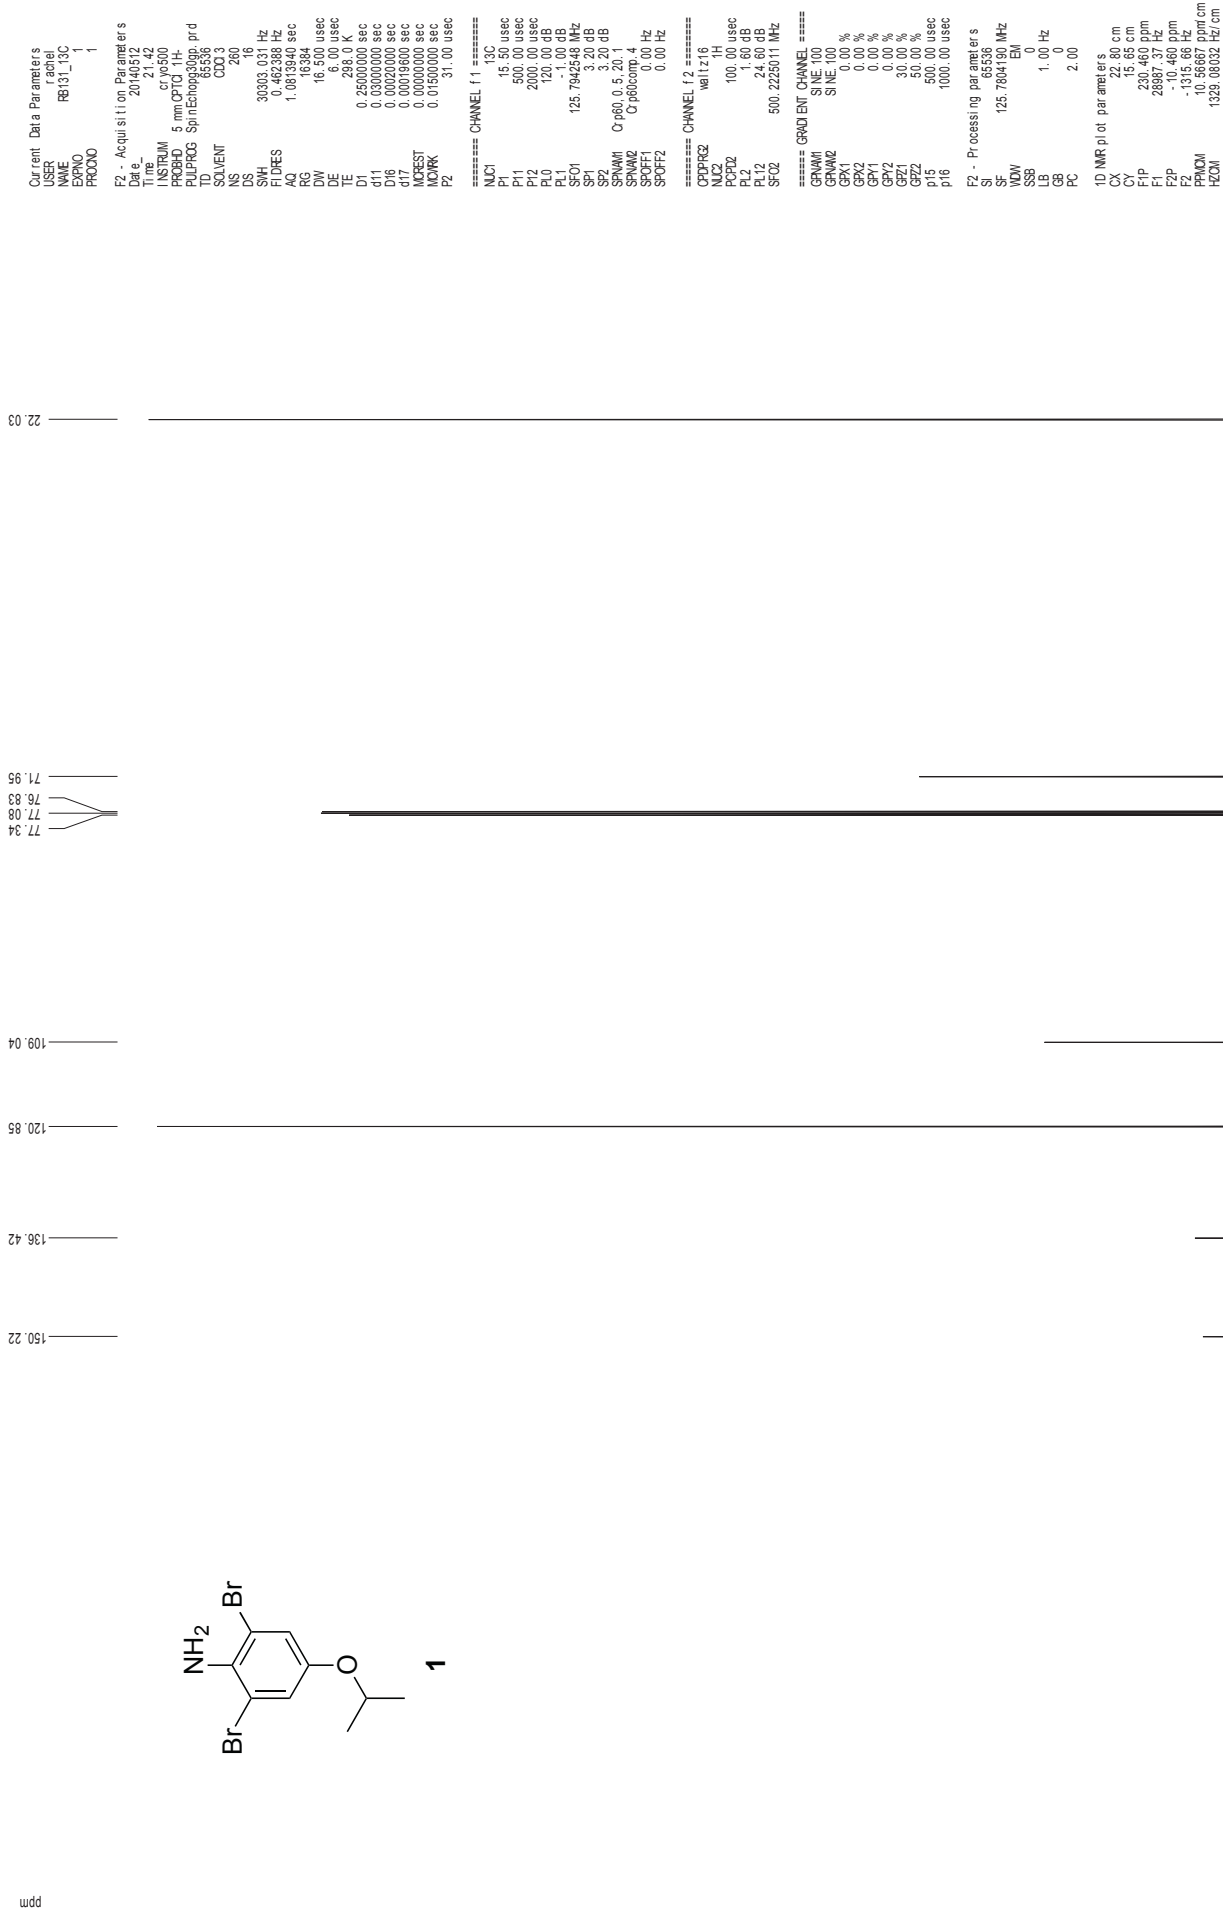

1H spectrum

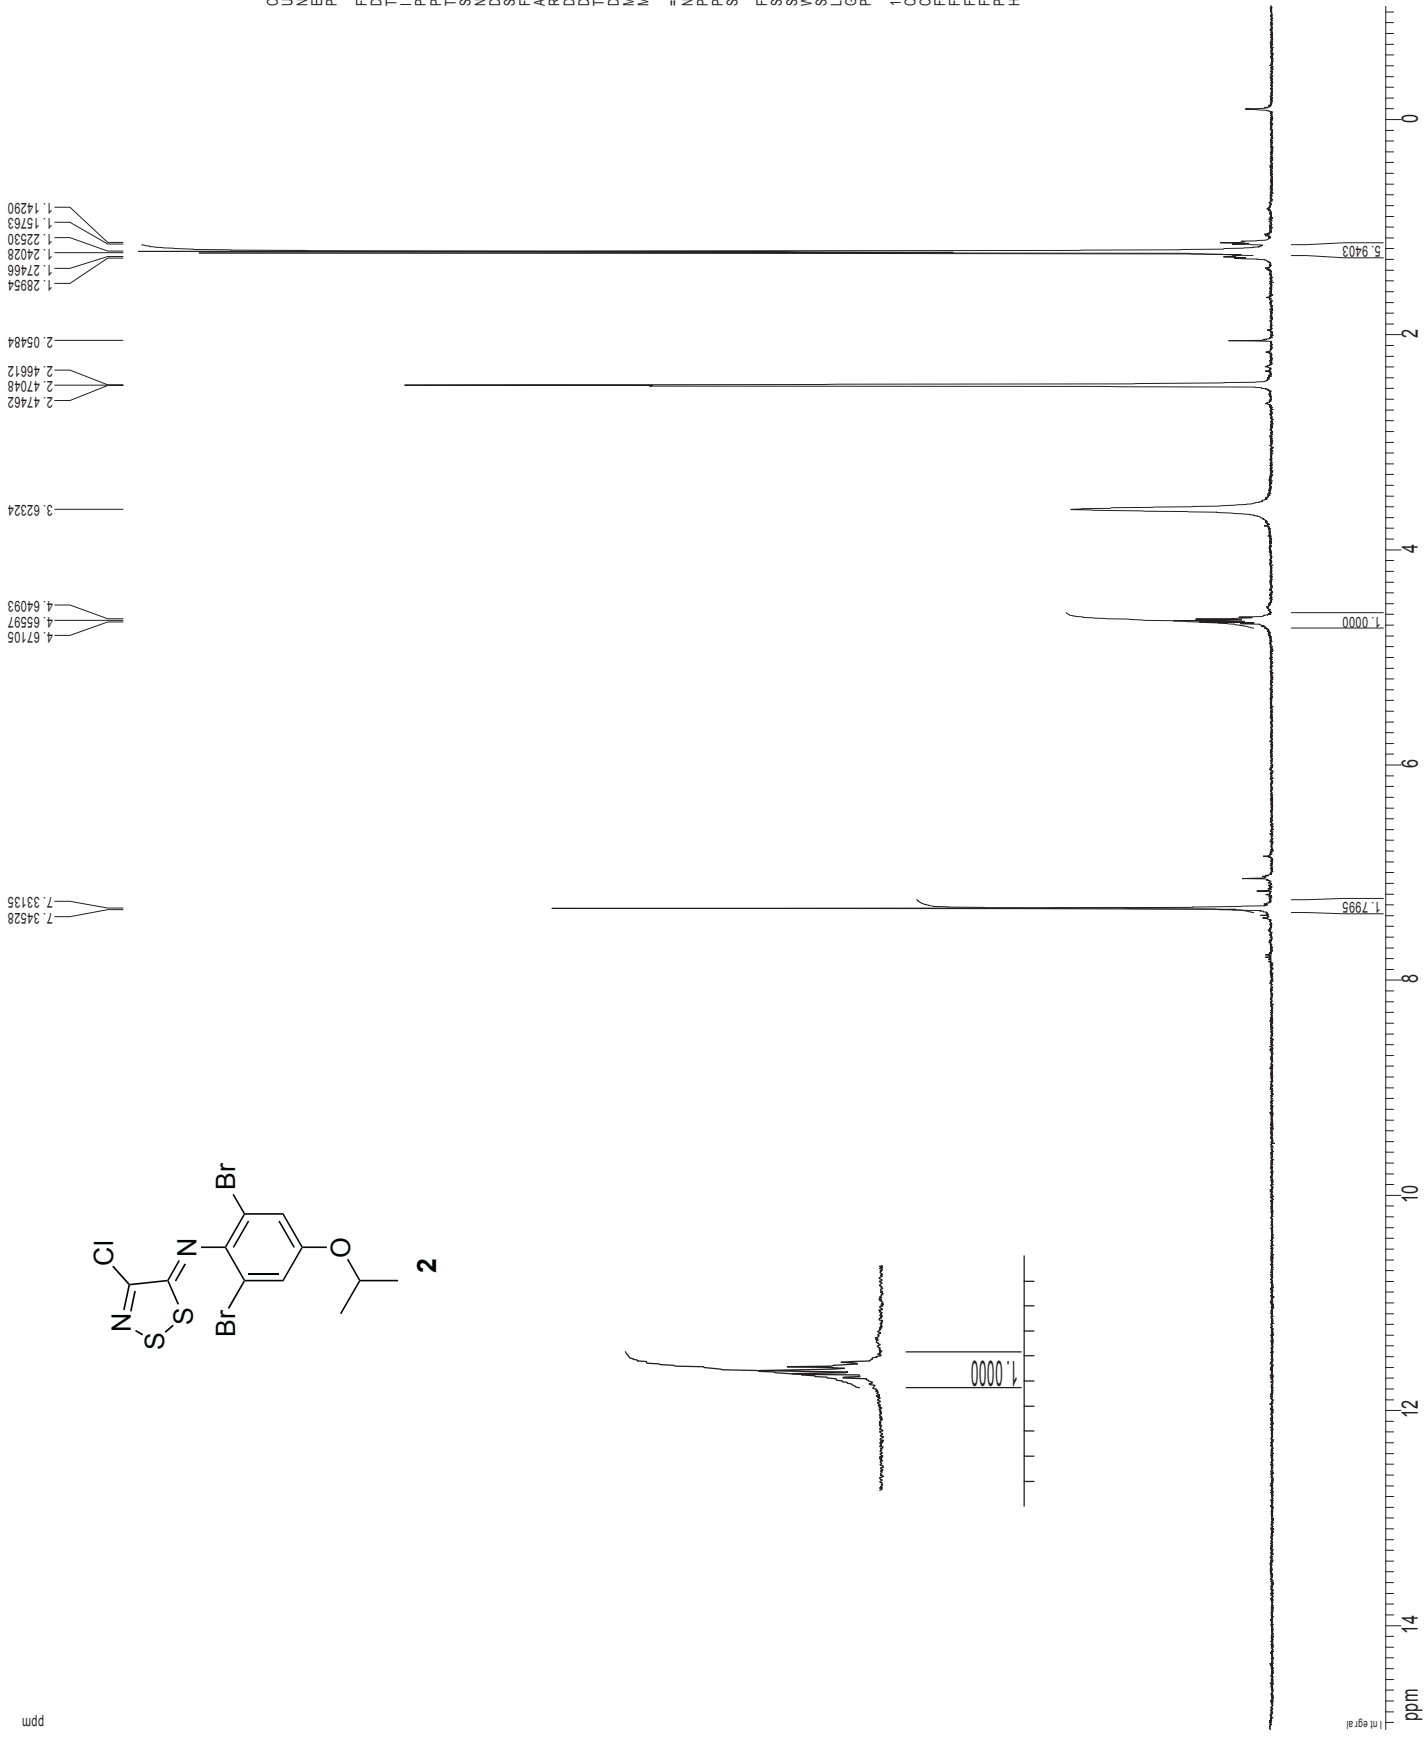

Current Data Parameters  
 User: racker  
 Name: r0255\_pump2  
 EXPNO: 1  
 PROCNO: 1

F2 - Acquisition Parameters  
 Date\_: 20141001  
 Time: 10.52  
 INSTRUM: drx400  
 PROBD: 5 mm QNP H/F/P  
 PULPROG: zg30  
 TD: 65536  
 SOLVENT: DMSO  
 DS: 2  
 SFO1: 400.1328009 MHz  
 FIDRES: 0.092813 Hz  
 AQ: 5.1118579 sec  
 RG: 1024  
 DW: 78.000 usec  
 DE: 4.50 usec  
 TE: 287.9 K  
 D1: 0.10000000 sec  
 MPREST: 0.00000000 sec  
 MDPRK: 0.01500000 sec

==== CHANNEL f1 =====  
 NUC1: 1H  
 P1: 12.00 usec  
 PL1: 0.00 dB  
 SFO1: 400.1328009 MHz

F2 - Processing parameters  
 SI: 65536  
 SF: 400.1300175 MHz  
 SSB: 0  
 EM: 0  
 LB: 0.30 Hz  
 GB: 0  
 PC: 2.00

1D NMR plot parameters  
 CY: 22.80 cm  
 CX: 15.00 cm  
 FIP: 14.966 ppm  
 F1: 5888.51 Hz  
 F2P: -1.054 ppm  
 F2: -421.74 Hz  
 PRMCM: 0.70265 ppm/cm  
 HZCM: 281.15168 Hz/cm

Z-restored spin-echo <sup>13</sup>C spectrum with <sup>1</sup>H decoupling

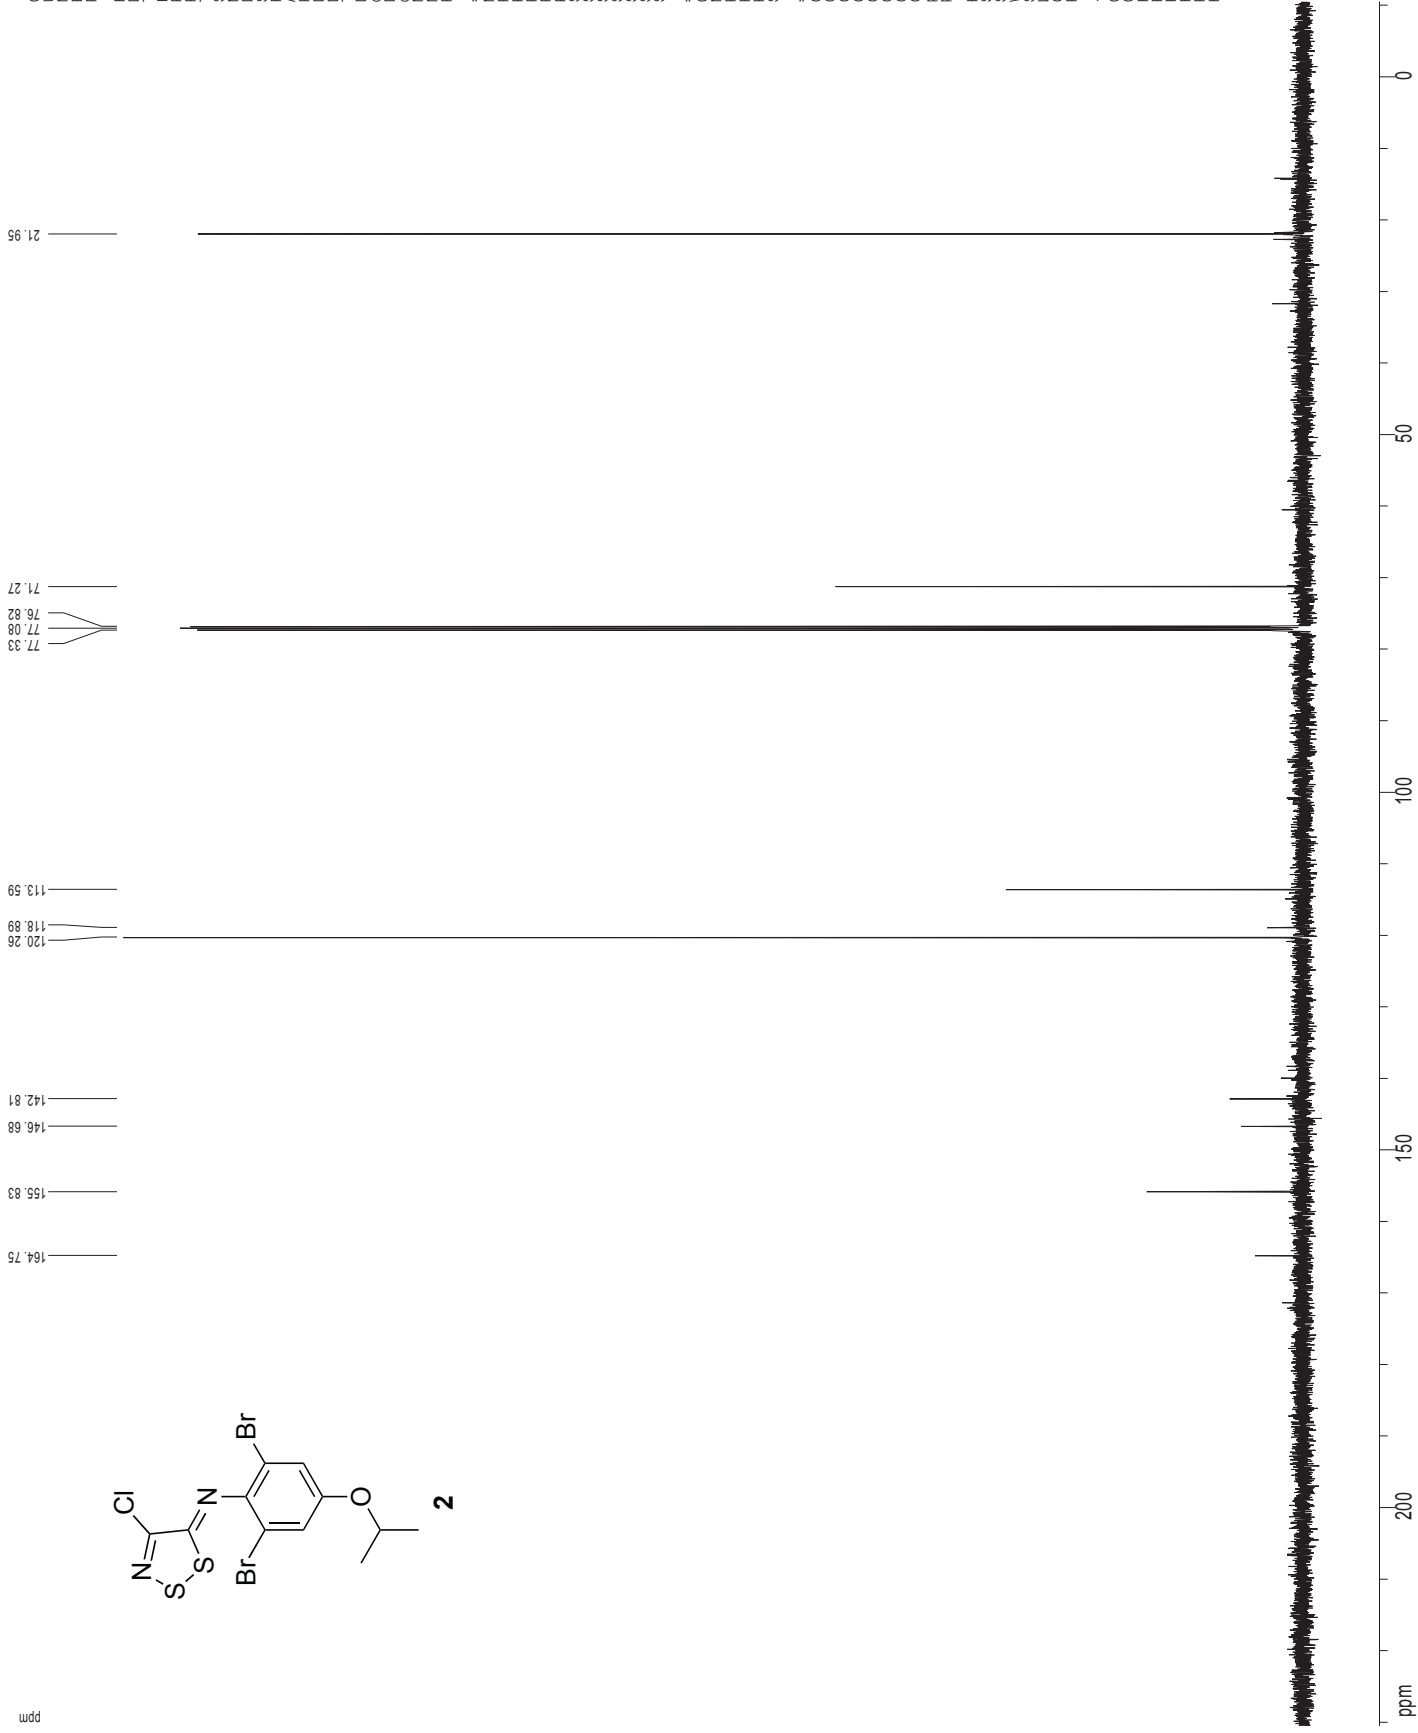

```

Current Data Parameters
=====
USER          rachel
NAME          RB171_cr13c
EXPNO         2
PROCNO        1
F2 - Acquisition Parameters
=====
Date_         20140624
Time          22.18
INSTRUM       cryo500
PROBHD        5 mm QNP 1H-
PULPROG       SpinEcho30pp.prd
TD            65536
SOLVENT       CDCl3
NS            596
DS            8
SWH           30303.031 Hz
FIDRES        0.462388 Hz
AQ            1.0813940 sec
RG            6502
DW            16.500 usec
DE            6.00 usec
TE            298.0 K
D1            0.95600000 sec
d11           0.03000000 sec
D16           0.00020000 sec
d17           0.00019800 sec
MDELTA        0.00000000 sec
MDELTA2       0.01500000 sec
P2            31.00 usec
===== CHANNEL f1 =====
NUC1           13C
PC1            15.50 usec
PL1            500.00 usec
PL2            2000.00 usec
PL0            120.00 dB
PL1            120.00 dB
PL2            -1.00 dB
SFO1           125.7942548 MHz
SFO2           3.20 dB
SFO3           3.20 dB
SFO4           3.20 dB
SFO5           3.20 dB
SFO6           3.20 dB
SFO7           3.20 dB
SFO8           3.20 dB
SFO9           3.20 dB
SFO10          3.20 dB
SFO11          3.20 dB
SFO12          3.20 dB
SFO13          3.20 dB
SFO14          3.20 dB
SFO15          3.20 dB
SFO16          3.20 dB
===== CHANNEL f2 =====
CPDPRG2       waltz16
NUC2           1H
PC2            100.00 usec
PL2            19.00 dB
PL0            24.60 dB
PL1            24.60 dB
SFO2           500.2259111 MHz
===== GRADIENT CHANNEL =====
GRVAM1        SINE 100
GRVAM2        SINE 100
GXY1           0.00 %
GXY2           0.00 %
GXY3           0.00 %
GXY4           0.00 %
GZ1            30.00 %
GZ2            50.00 %
GZ3            50.00 %
p15           500.00 usec
p16           1000.00 usec
F2 - Processing parameters
=====
SI             32768
SF             125.7694100 MHz
WDW            EM
SSB            0
LB             1.00 Hz
GB             0
PC             2.00
ID NMR plot parameters
=====
X1             20.00 ppm
X2             15.00 ppm
Y1             230.460 ppm
Y2             28887.37 Hz
F2             -10.460 ppm
F2             -1315.66 Hz
PPMCM          10.56887 ppm/cm
HZCM           1329.08032 Hz/cm
    
```



1H spectrum

ppm

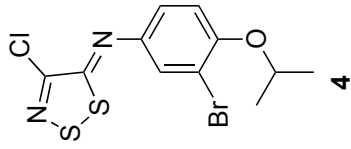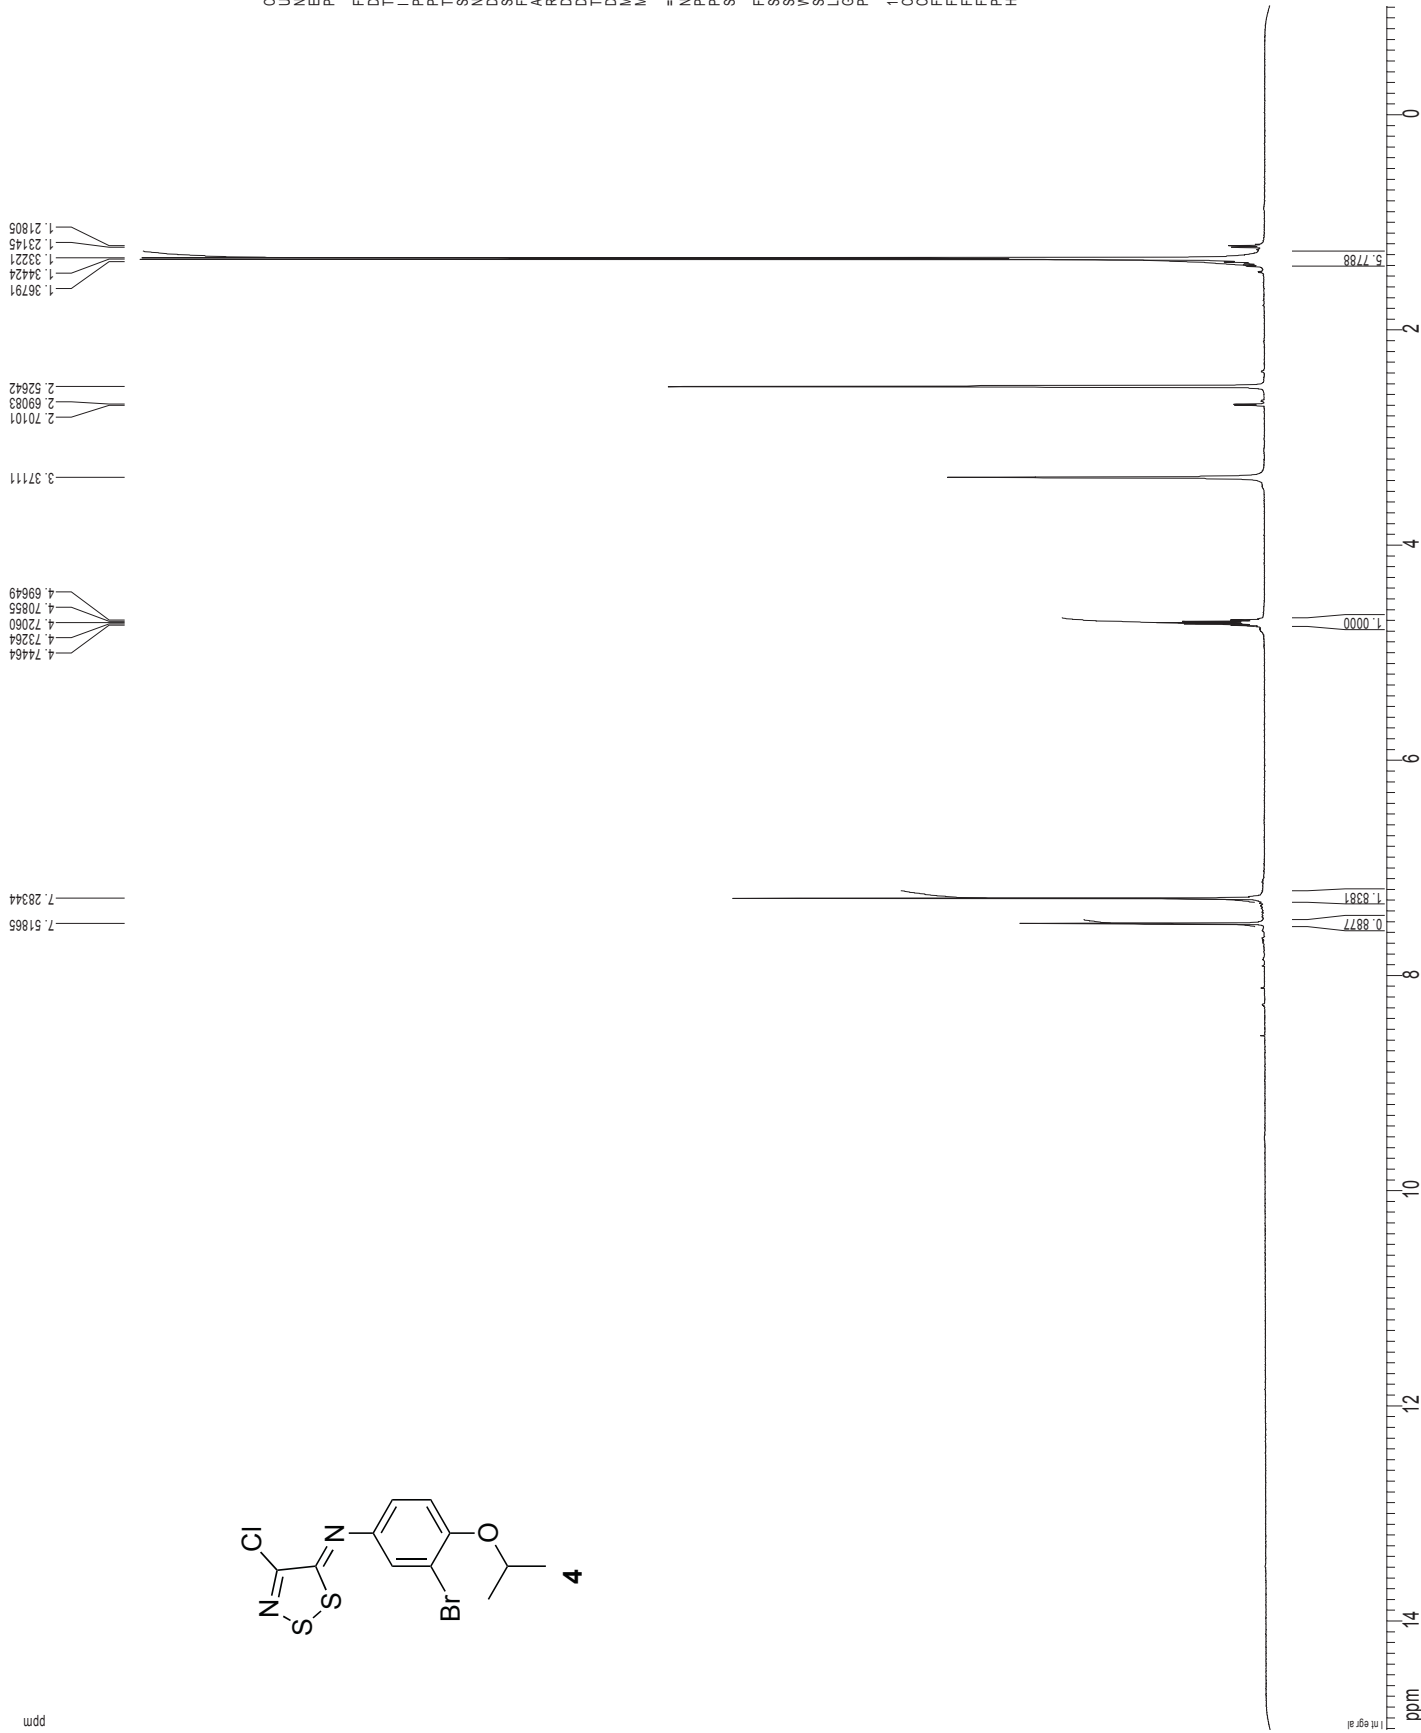

Current Data Parameters  
 USER rachel  
 NAME RB282\_1hcr1yo  
 EXPNO 2  
 PROCNO 1

F2 - Acquisition Parameters  
 Date\_ 20141108  
 Time 16.33  
 INSTRUM cryso500  
 PULPROG zgpg30  
 F2 - Processing parameters  
 SI 65536  
 SF 500.220000 MHz  
 WDW EM  
 SSB 0  
 GB 0  
 CB 0  
 PC 4.00

1D NMR plot parameters  
 CX 22.60 cm  
 CY 15.00 cm  
 FIP 15.009 ppm  
 F1 7507.95 Hz  
 F2P -1.009 ppm  
 F2 -904.87 Hz  
 PRICM 0.70257 ppm/cm  
 FOCM 351.43951 Hz/cm

==== CHANNEL f1 =====  
 NU1 1H  
 P1 7.50 usec  
 PL1 1.60 dB  
 SFO1 500.2235015 MHz

F2 - Acquisition Parameters  
 Date\_ 20141108  
 Time 16.33  
 INSTRUM cryso500  
 PULPROG zgpg30  
 F2 - Processing parameters  
 SI 65536  
 SF 500.220000 MHz  
 WDW EM  
 SSB 0  
 GB 0  
 CB 0  
 PC 4.00

1D NMR plot parameters  
 CX 22.60 cm  
 CY 15.00 cm  
 FIP 15.009 ppm  
 F1 7507.95 Hz  
 F2P -1.009 ppm  
 F2 -904.87 Hz  
 PRICM 0.70257 ppm/cm  
 FOCM 351.43951 Hz/cm

Z-restored spin-echo <sup>13</sup>C spectrum with <sup>1</sup>H decoupling

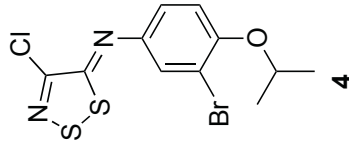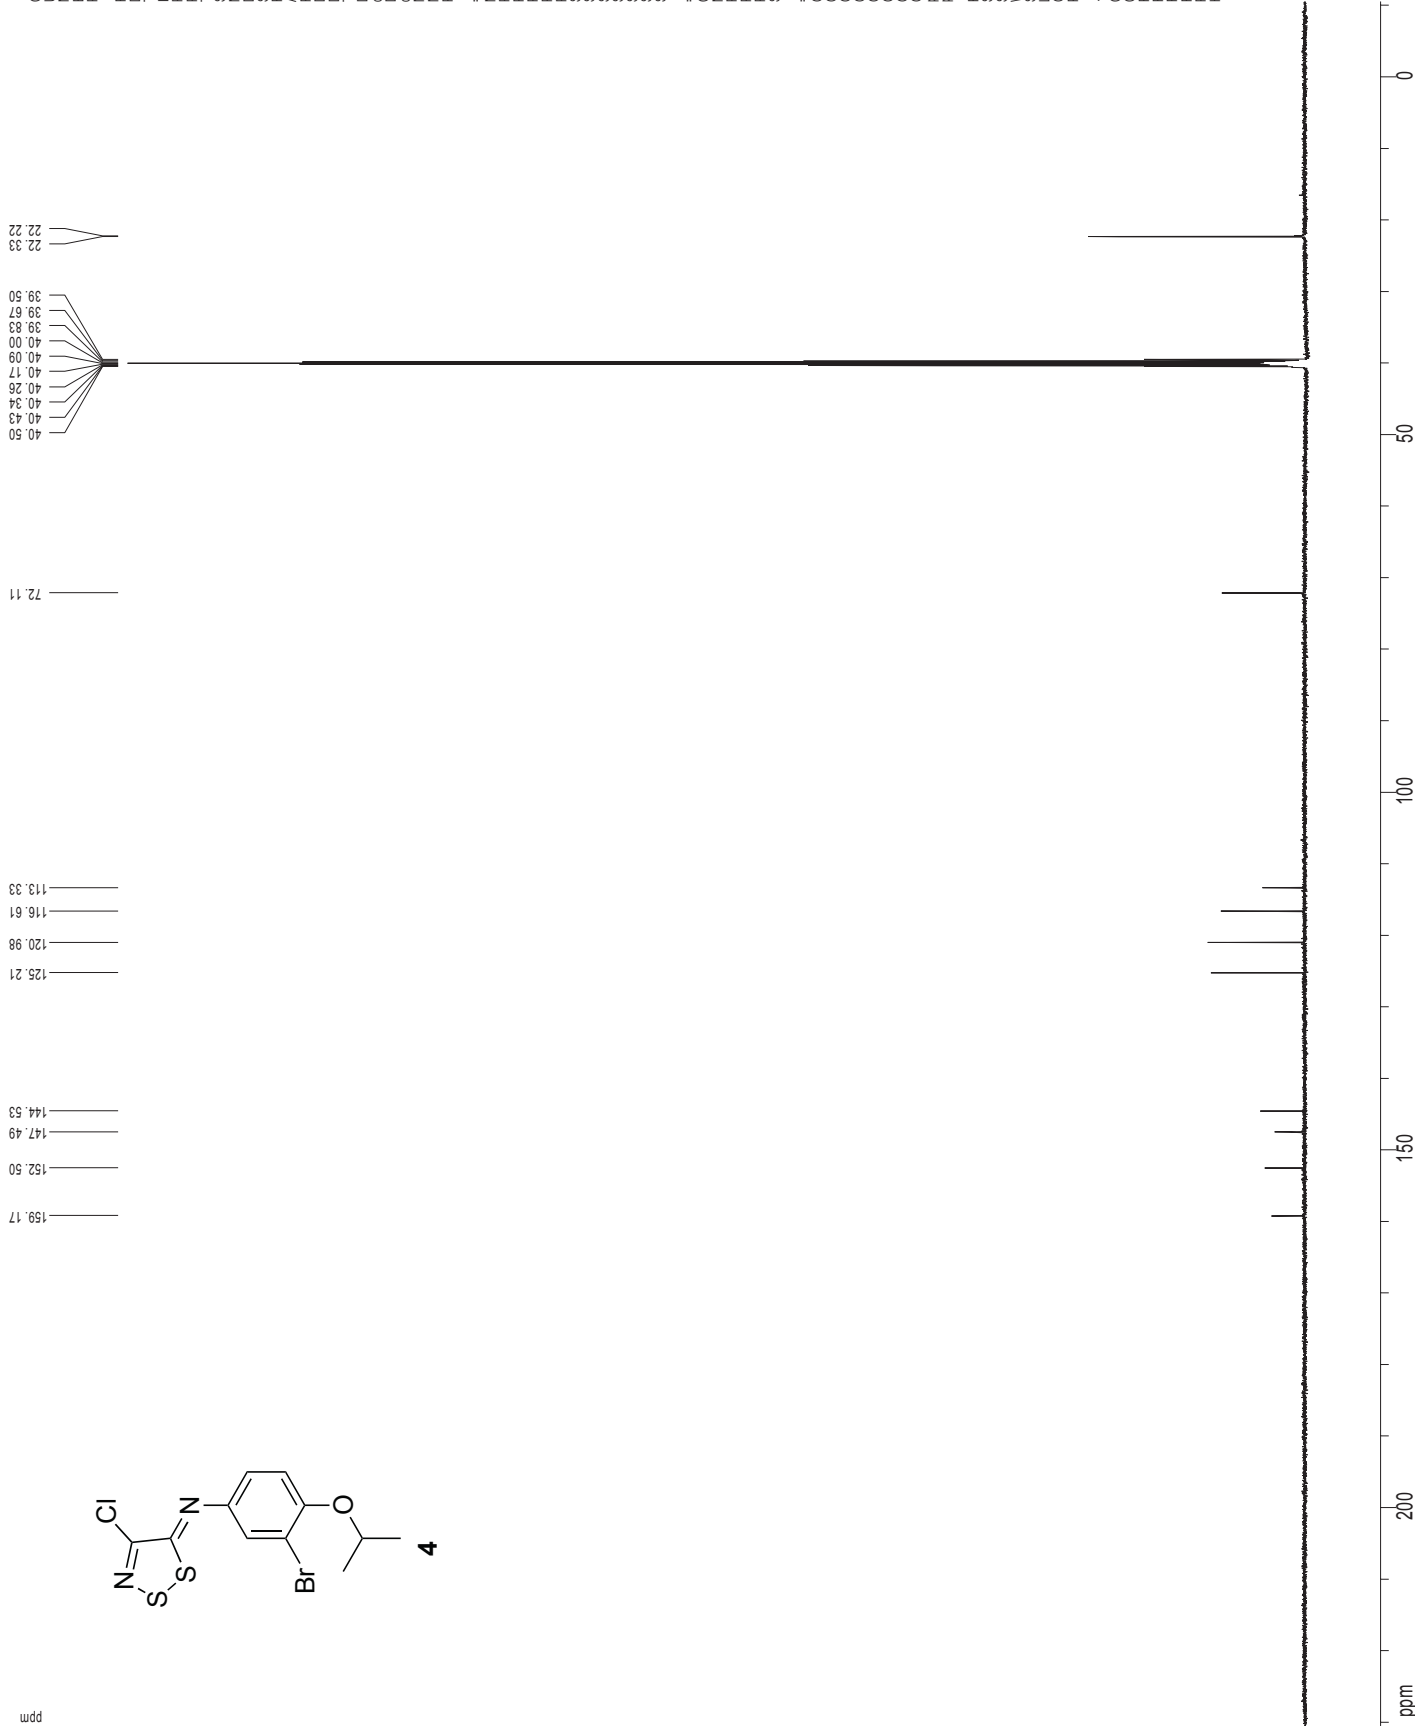

Current Data Parameters  
 USER rb22\_13c1yo  
 EXPNO 2  
 PROCNO 1  
 F2 - Acquisition Parameters  
 Date\_ 20141108  
 Time 16.39  
 INSTRUM cryo500  
 PROBD 5 mm QNP 1H-  
 PULPROG SpinEcho3gpp.prd  
 TD 65536  
 SOLVENT CDCl3  
 NS 1024  
 DS 4  
 SWH 30303.031 Hz  
 FIDRES 0.462388 Hz  
 AQ 1.0813840 sec  
 RG 7298.2  
 DW 16.500 usec  
 DE 6.00 usec  
 TE 298.0 K  
 D1 0.9560000 sec  
 d11 0.0300000 sec  
 d16 0.0002000 sec  
 d17 0.00019800 sec  
 MDREST 0.0000000 sec  
 MDWRK 0.01500000 sec  
 P2 31.00 usec  
 ===== CHANNEL f1 =====  
 NUC1 <sup>13</sup>C  
 P1 15.50 usec  
 PL1 500.00 usec  
 PL2 2000.00 usec  
 PL0 120.00 dB  
 PL1 -1.00 dB  
 SFO1 125.7942548 MHz  
 SFO2 500.2225011 MHz  
 SP1 3.20 dB  
 SP2 3.20 dB  
 SP16 3.20 dB  
 SFO16 500.1313600 MHz  
 SFOFF1 0.00 Hz  
 SFOFF2 0.00 Hz  
 ===== CHANNEL f2 =====  
 CPDPRG2 waltz16  
 NUC2 <sup>1</sup>H  
 P1 100.00 usec  
 PL1 2.00 dB  
 PL2 24.60 dB  
 SFO2 500.2225011 MHz  
 ===== GRADIENT CHANNEL =====  
 GRVAM1 SINE 100  
 GRVAM2 SINE 100  
 GRX1 0.00 %  
 GRX2 0.00 %  
 GRZ1 0.00 %  
 GRZ2 0.00 %  
 GRZ3 30.00 %  
 GRZ4 50.00 %  
 p15 500.00 usec  
 p16 1000.00 usec  
 F2 - Processing parameters  
 SI 65536  
 SF 125.7694400 MHz  
 VWDW 0  
 SSB 0  
 LB 1.00 Hz  
 GB 0  
 PC 2.00  
 ID NMR plot parameters  
 AX 2.00 cm  
 CY 15.68 cm  
 F1P 230.460 ppm  
 F1 28887.37 Hz  
 F2P -10.460 ppm  
 F2 -1315.66 Hz  
 PPMCM 10.56887 ppm/cm  
 FZCM 1329.08032 Hz/cm

1H spectrum

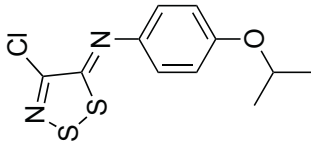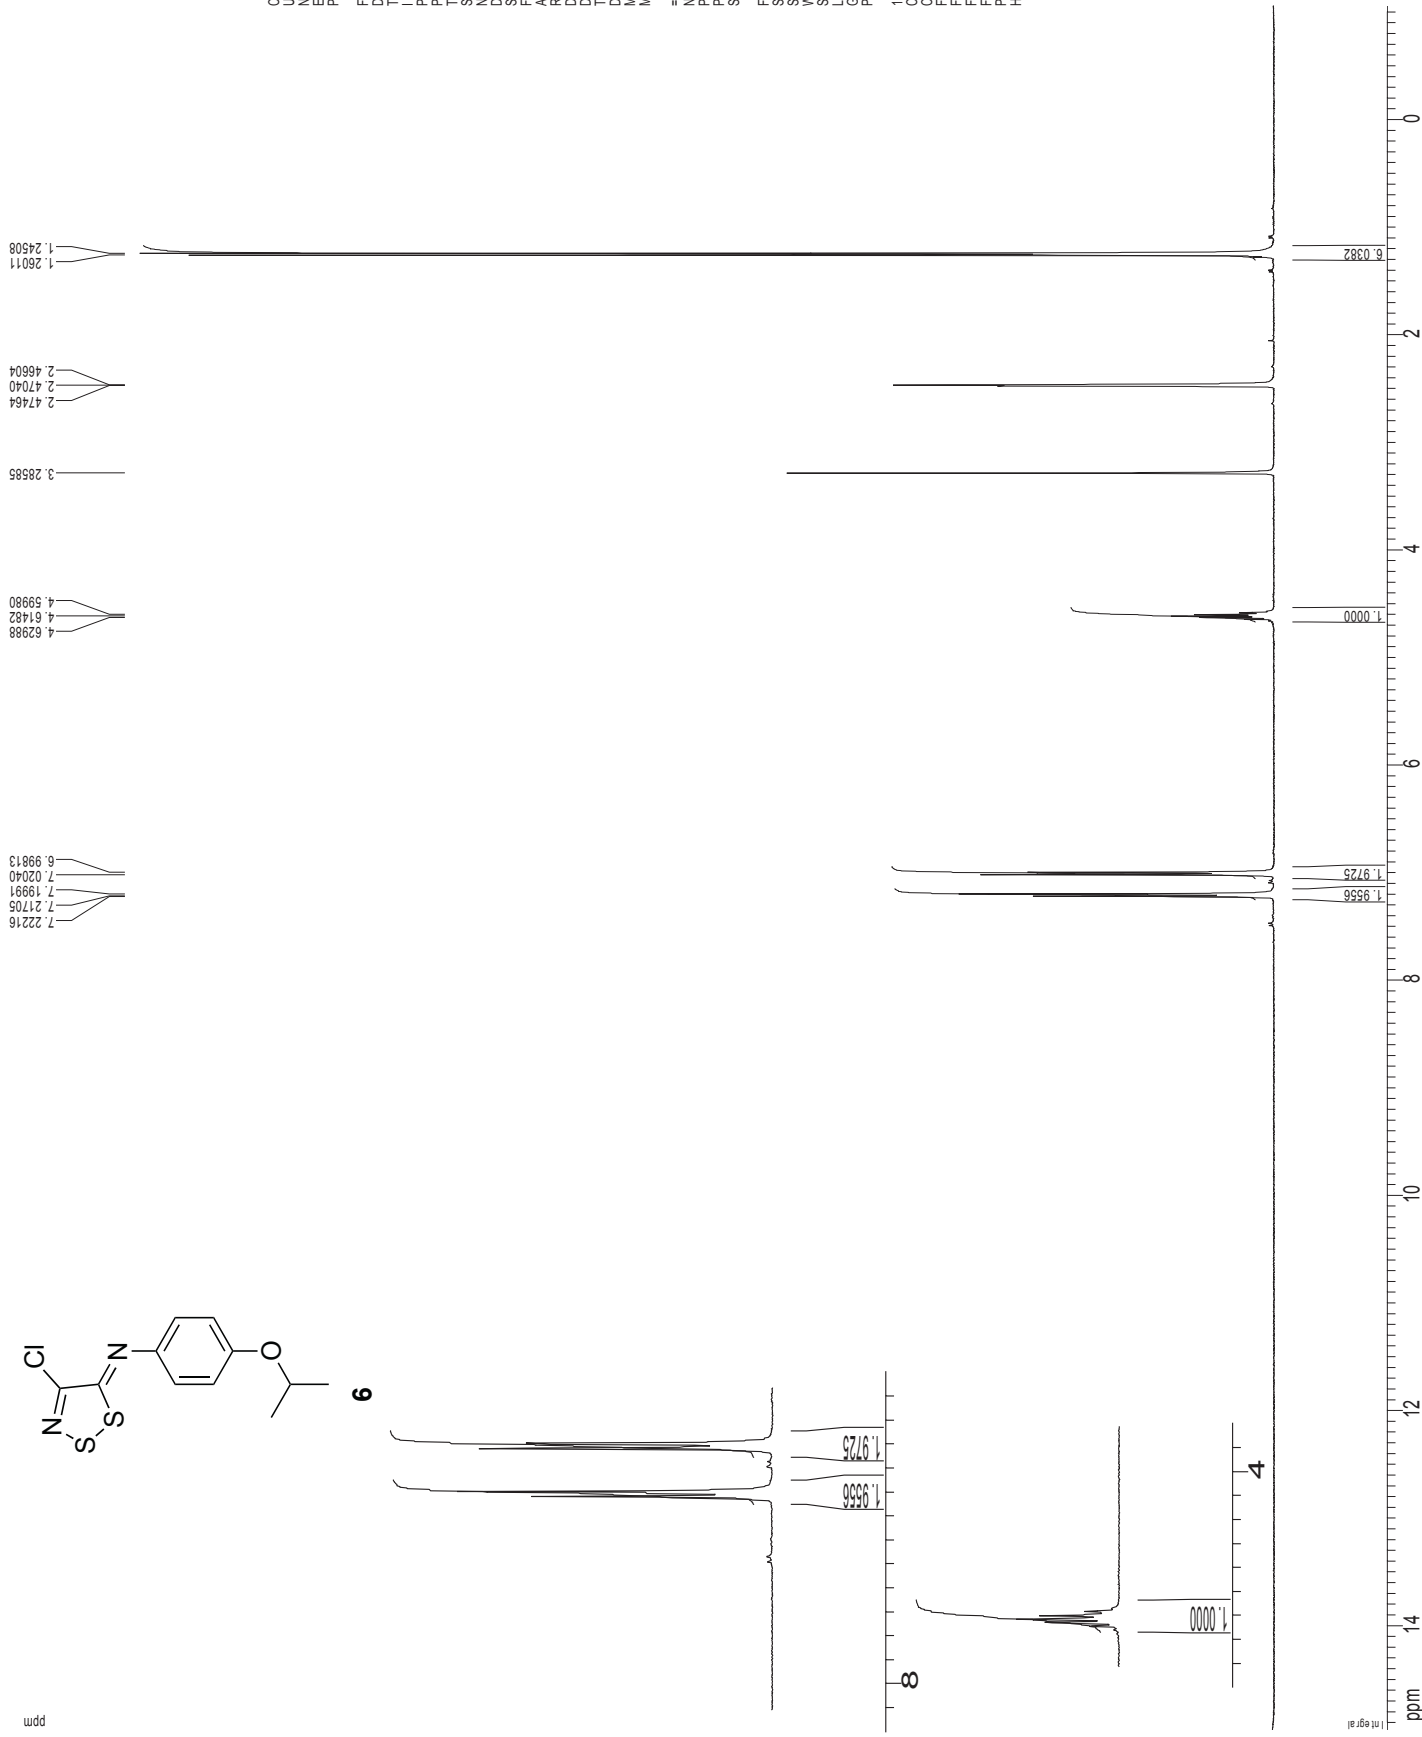

Current Data Parameters  
 USER: r125\_ume1  
 NAME: r125\_ume1  
 EXPNO: 1  
 PROCNO: 1

F2 - Acquisition Parameters  
 Date\_: 20140925  
 Time: 13.33  
 INSTRUM: drx400  
 PROBD: 5 mm QNP H/F/P  
 PULPROG: zg30  
 TD: 65536  
 SOLVENT: DMSO  
 DS: 2  
 SFO1: 400.1328009 MHz  
 SWH: 6410.256 Hz  
 FIDRES: 0.092813 Hz  
 AQ: 5.1118579 sec  
 RG: 645.1  
 DW: 78.000 usec  
 DE: 4.50 usec  
 TE: 288.0 K  
 D1: 0.1000000 sec  
 MPREST: 0.0000000 sec  
 MDMR: 0.0150000 sec

==== CHANNEL f1 =====  
 NUC1: 1H  
 P1: 12.00 usec  
 PL1: 0.00 dB  
 SFO1: 400.1328009 MHz

F2 - Processing parameters  
 SI: 65536  
 SF: 400.1300175 MHz  
 EM: 0  
 WDW: 0.30 Hz  
 LB: 0  
 GB: 0  
 PC: 2.00

1D NMR plot parameters  
 CX: 22.80 cm  
 CY: 15.00 cm  
 F1: 14.966 ppm  
 F2: 5888.51 Hz  
 F2P: -1.054 ppm  
 F2: -421.74 Hz  
 PPMCM: 0.70265 ppm/cm  
 HZCM: 281.15168 Hz/cm

Z-restored spin-echo <sup>13</sup>C spectrum with <sup>1</sup>H decoupling

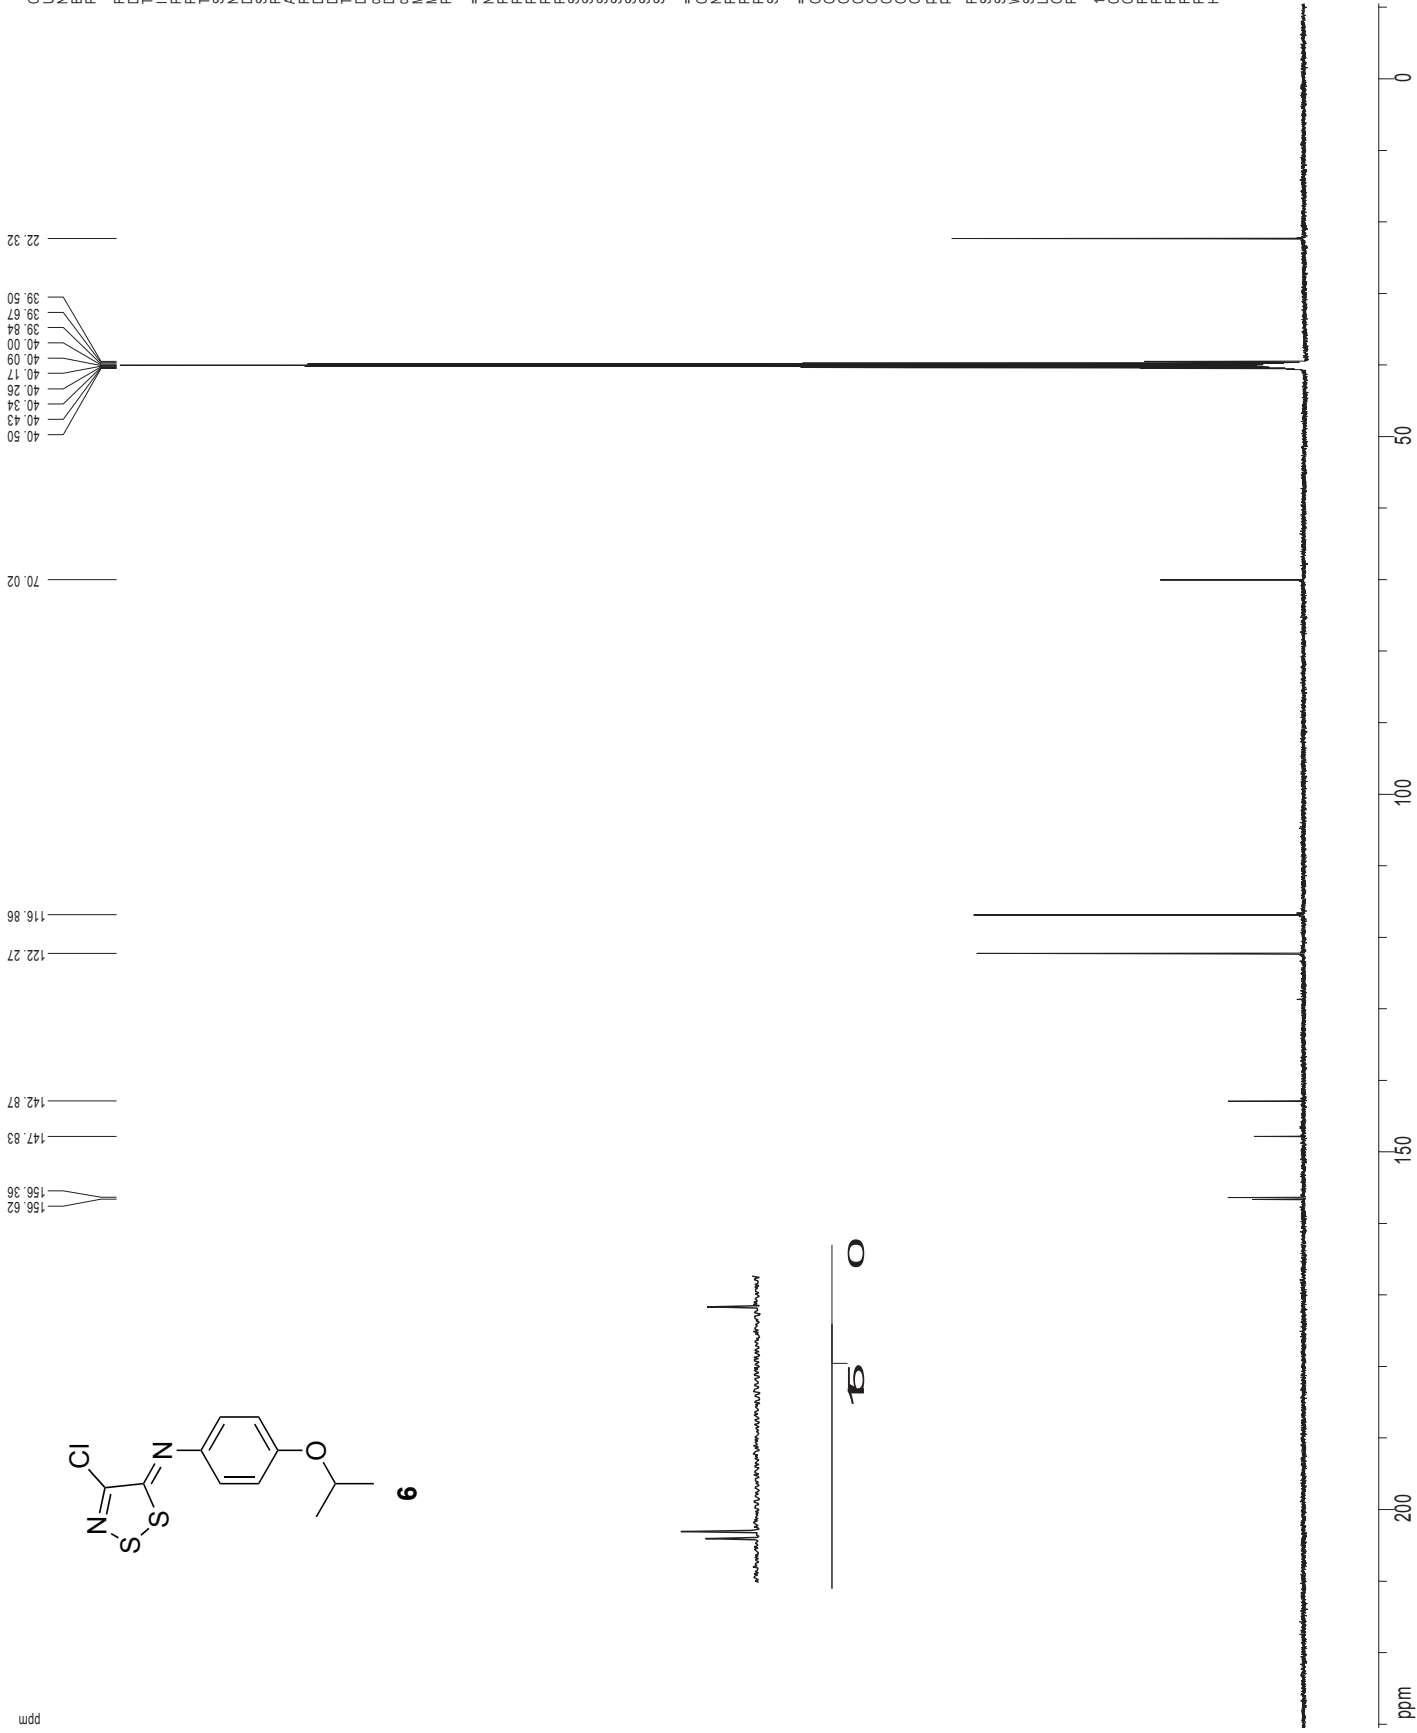

1H spectrum

ppm

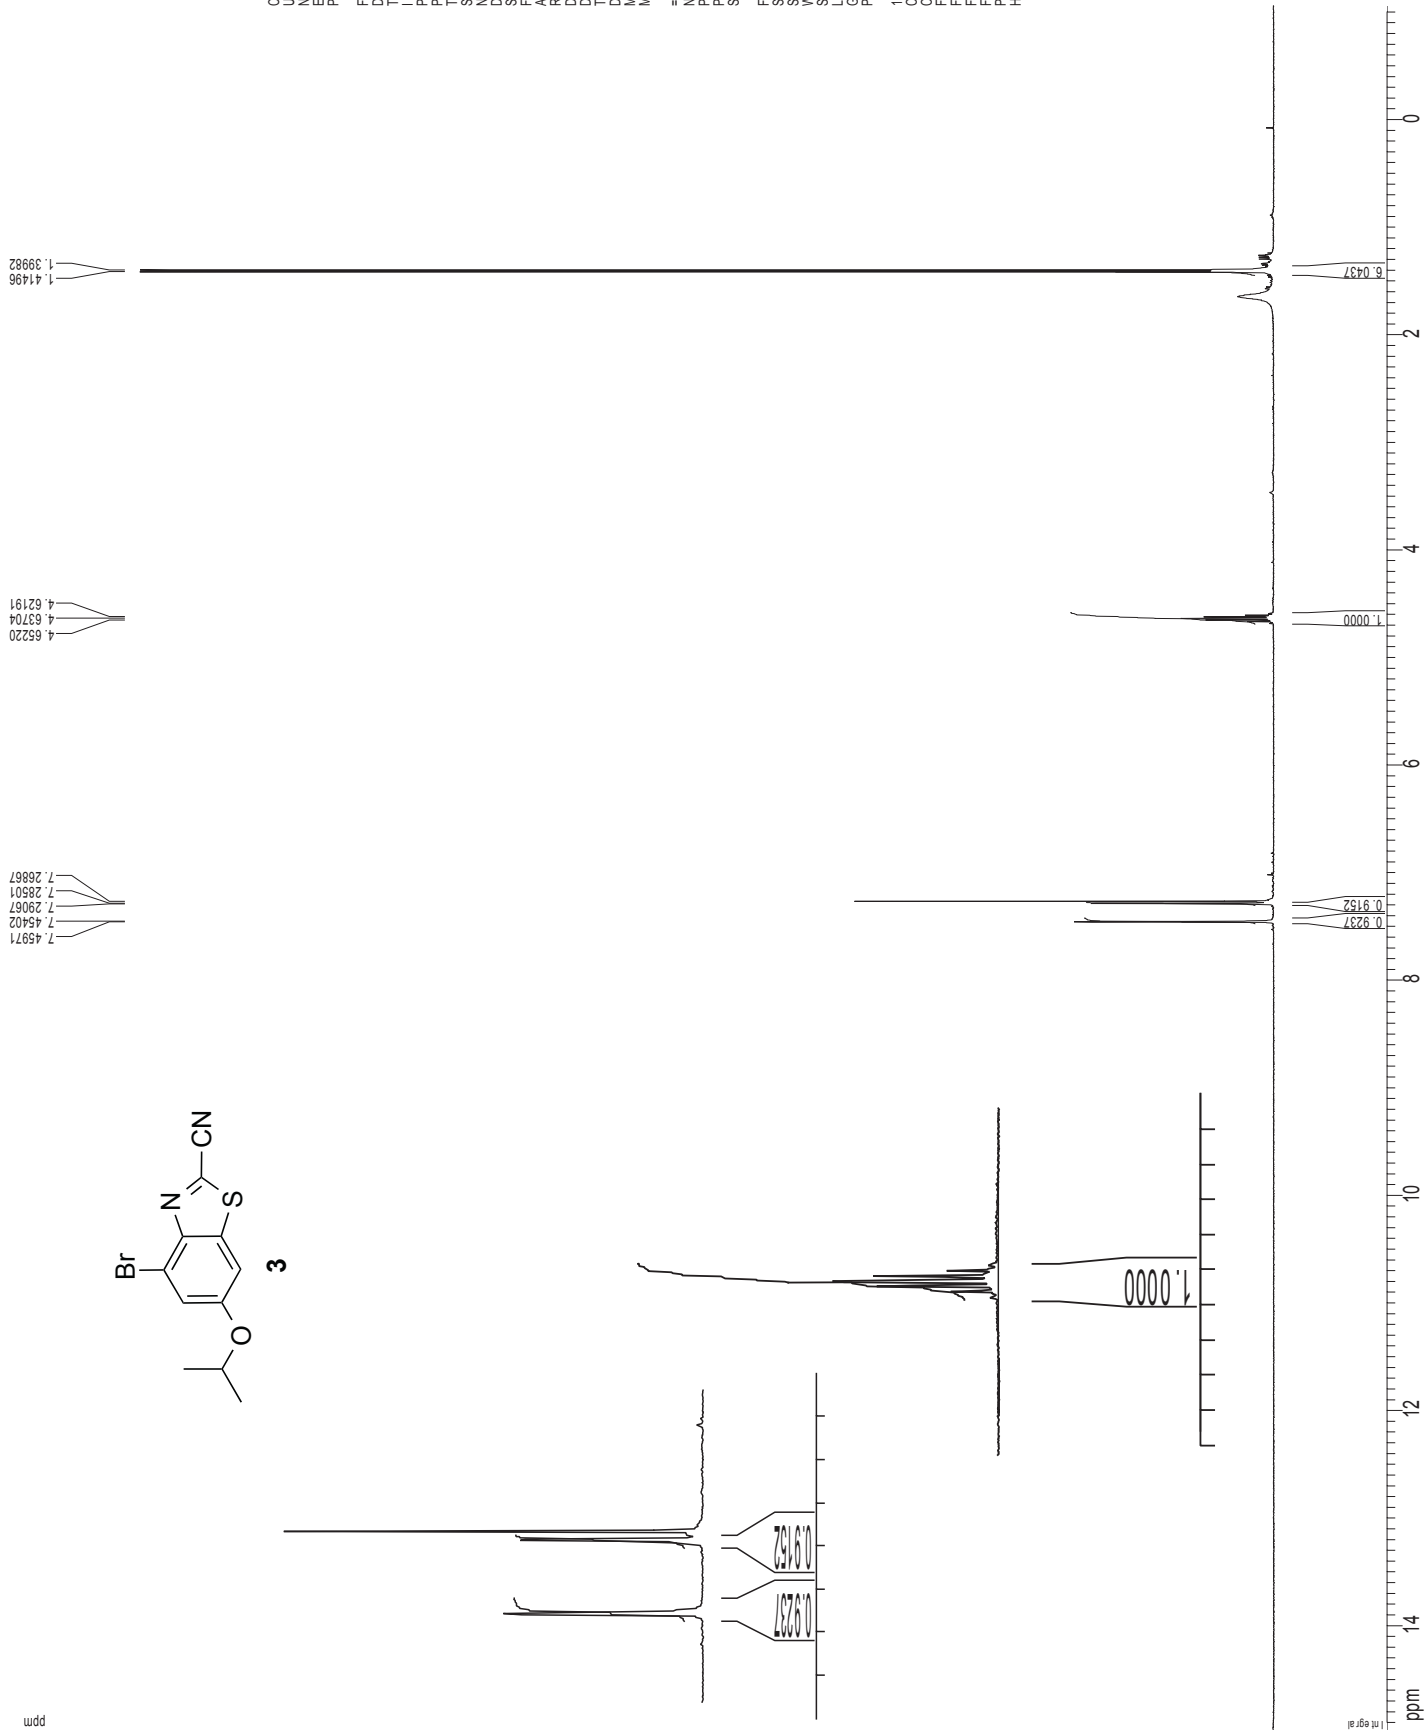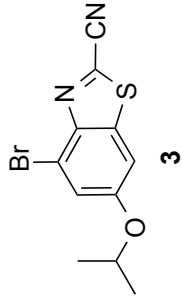

Current Data Parameters  
 USER: jst  
 NAME: RB156  
 EXPNO: 1  
 PROCNO: 1  
 F2 - Acquisition Parameters  
 Date\_: 20140605  
 Time: 10.16  
 INSTRUM: drx400  
 PROBD: 5 mm QNP H/F/P  
 PULPROG: zgpg30  
 TD: 65536  
 SOLVENT: CDCl3  
 DS: 2  
 SWH: 6410.256 Hz  
 FIDRES: 0.092813 Hz  
 AQ: 5.1118579 sec  
 RG: 812.7  
 DW: 78.000 usec  
 DE: 4.50 usec  
 TE: 288.0 K  
 D1: 0.1000000 sec  
 MPREST: 0.0000000 sec  
 MDWRK: 0.0150000 sec  
 ===== CHANNEL f1 =====  
 NUC1: 1H  
 P1: 12.00 usec  
 PL1: 0.00 dB  
 SFO1: 400.1328009 MHz  
 F2 - Processing parameters  
 SI: 65536  
 SF: 400.1300175 MHz  
 WDW: EM  
 SSB: 0  
 LB: 0.30 Hz  
 GB: 0  
 PC: 2.00  
 ID: NMRplot parameters  
 CX: 22.80 cm  
 CY: 15.00 cm  
 FIP: 14.966 ppm  
 F1: 5888.51 Hz  
 F2P: -1.054 ppm  
 F2: -421.74 Hz  
 PPMCM: 0.70265 ppm/cm  
 HZCM: 281.15168 Hz/cm

Z-restored spin-echo <sup>13</sup>C spectrum with <sup>1</sup>H decoupling

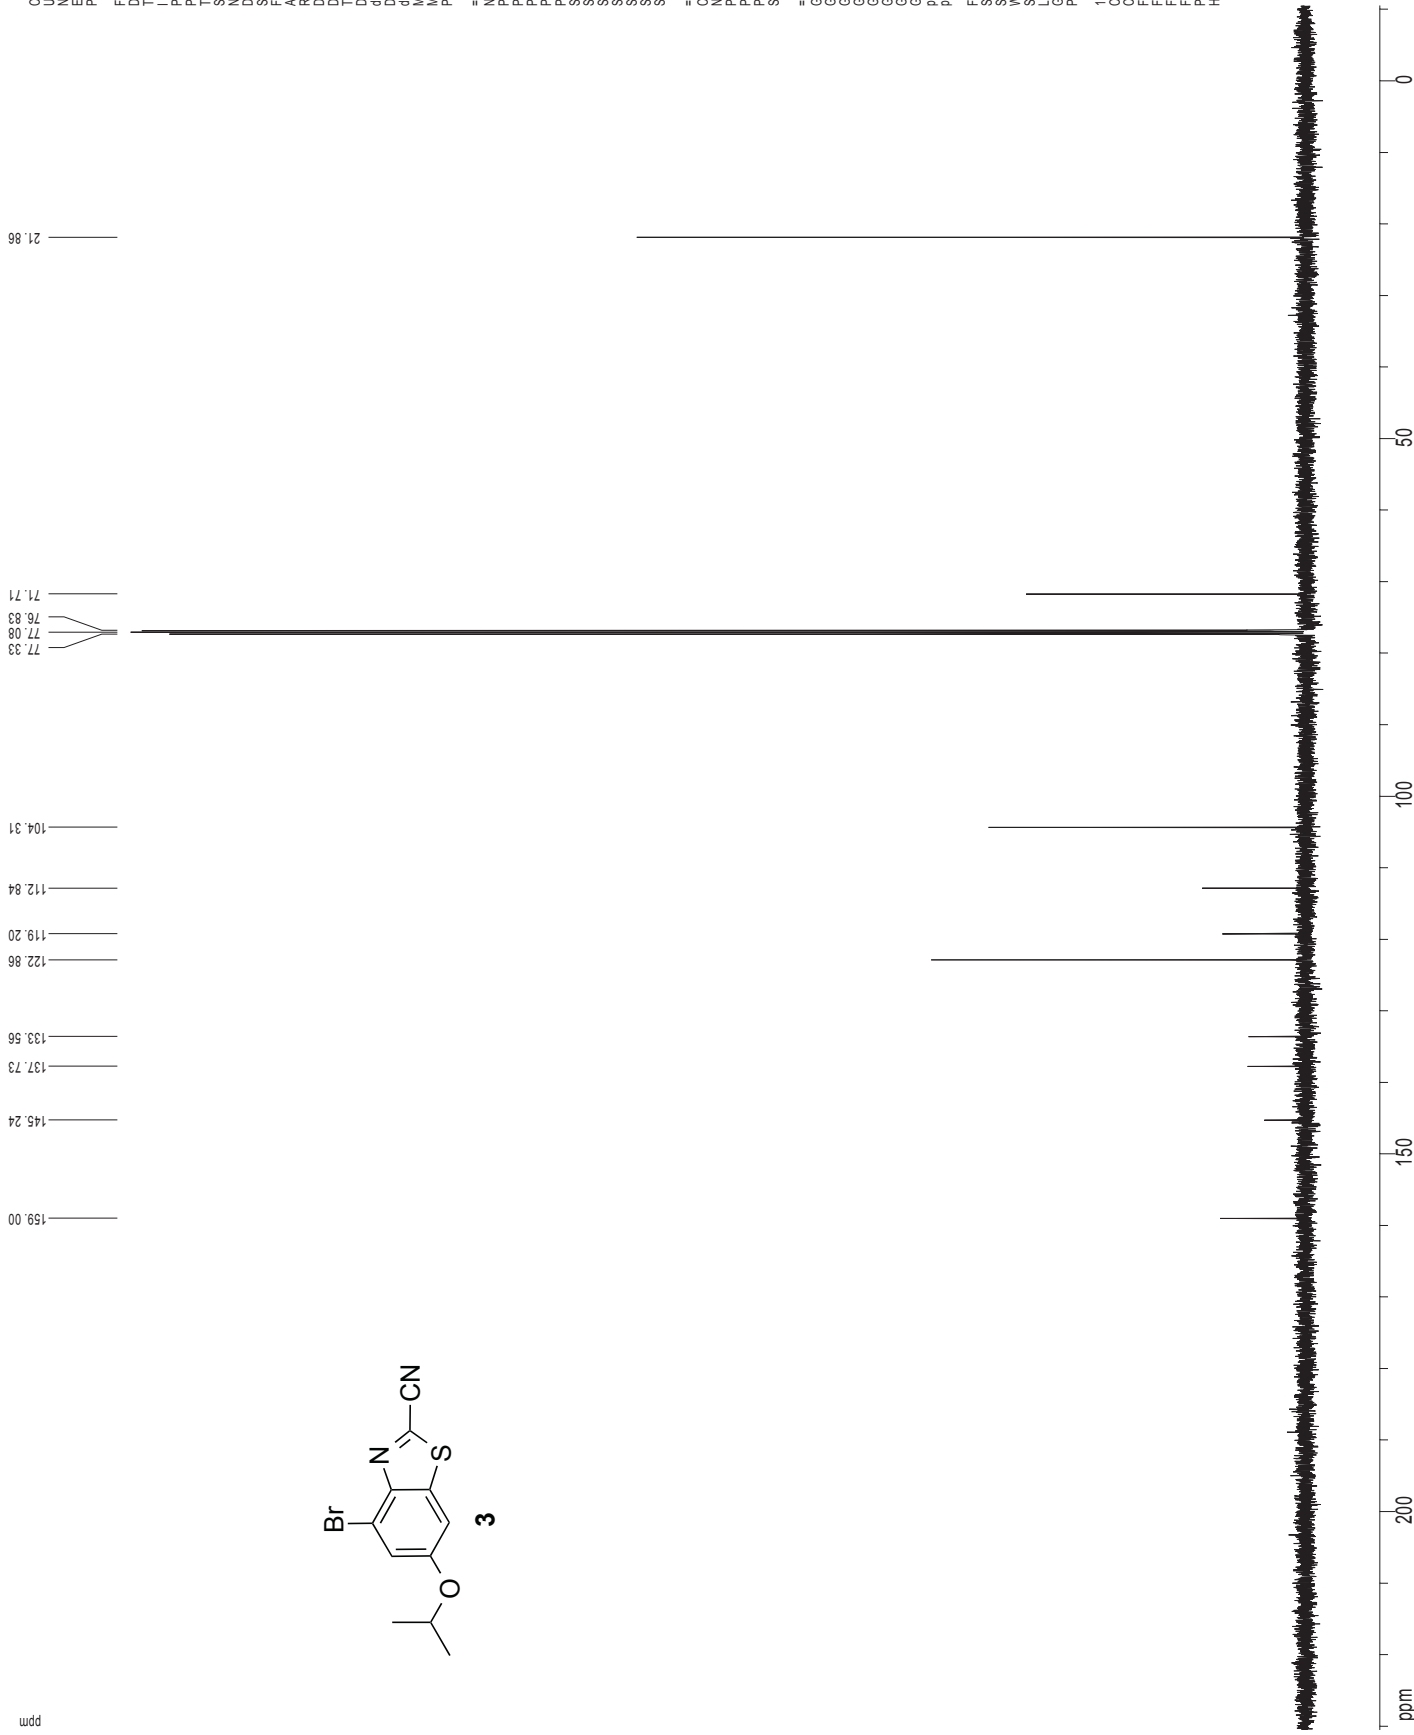

Current Data Parameters  
 USER rachel  
 NAME R0156\_cr13c  
 EXPNO 2  
 PROCNO 1  
 F2 - Acquisition Parameters  
 Date\_ 20140605  
 Time 11.13  
 INSTRUM cr130500  
 PROBHD 5 mm QNP 1H-  
 PULPROG SpinEcho30pp.prd  
 TD 65536  
 SOLVENT CDCl3  
 NS 613  
 DS 4  
 SWH 30303.031 Hz  
 FIDRES 0.462388 Hz  
 AQ 1.0813940 sec  
 RG 6502  
 DW 16.500 usec  
 DE 6.00 usec  
 TE 298.0 K  
 D1 0.9550000 sec  
 d11 0.0300000 sec  
 D16 0.0002000 sec  
 d17 0.0001900 sec  
 ACPREST 0.0000000 sec  
 MDPRK 0.0150000 sec  
 P2 31.00 usec  
 ===== CHANNEL f1 =====  
 NUC1 <sup>13</sup>C  
 P1 15.50 usec  
 PL1 500.00 usec  
 PL2 2000.00 usec  
 PL0 120.00 dB  
 PL1 120.00 dB  
 SFO1 125.7942545 MHz  
 SF1 3.20 dB  
 SFO2 3.20 dB  
 SFO3 3.20 dB  
 SPINPM1 Op60.0.5.20.4  
 SPINPM2 Op60.0.5.20.4  
 SPOFF1 0.00 Hz  
 SPOFF2 0.00 Hz  
 ===== CHANNEL f2 =====  
 CPDPRG2 waltz16  
 NUC2 <sup>1</sup>H  
 P1P2 100.00 usec  
 PL1 24.00 dB  
 PL2 24.00 dB  
 SF02 500.225811 MHz  
 ===== GRADIENT CHANNEL =====  
 GRVAM1 SINE 100  
 GRVAM2 SINE 100  
 GRX1 0.00 %  
 GRX2 0.00 %  
 GRZ1 0.00 %  
 GRZ2 0.00 %  
 GRZ3 0.00 %  
 p15 500.00 usec  
 p16 1000.00 usec  
 F2 - Processing parameters  
 SI 65536  
 SF 125.769400 MHz  
 EQ 1  
 VWDW EM  
 SSB 0  
 LB 1.00 Hz  
 GB 0  
 PC 2.00  
 1D NMR plot parameters  
 X 2.00 cm  
 Y 45.68 cm  
 Z 230.460000 mm  
 F1 28887.37 Hz  
 F2 -10.460000 ppm  
 F2 -1315.66 Hz  
 PPMCM 10.56887 ppm/cm  
 HZCM 1329.08032 Hz/cm

1H spectrum

ppm

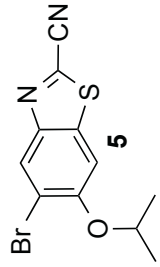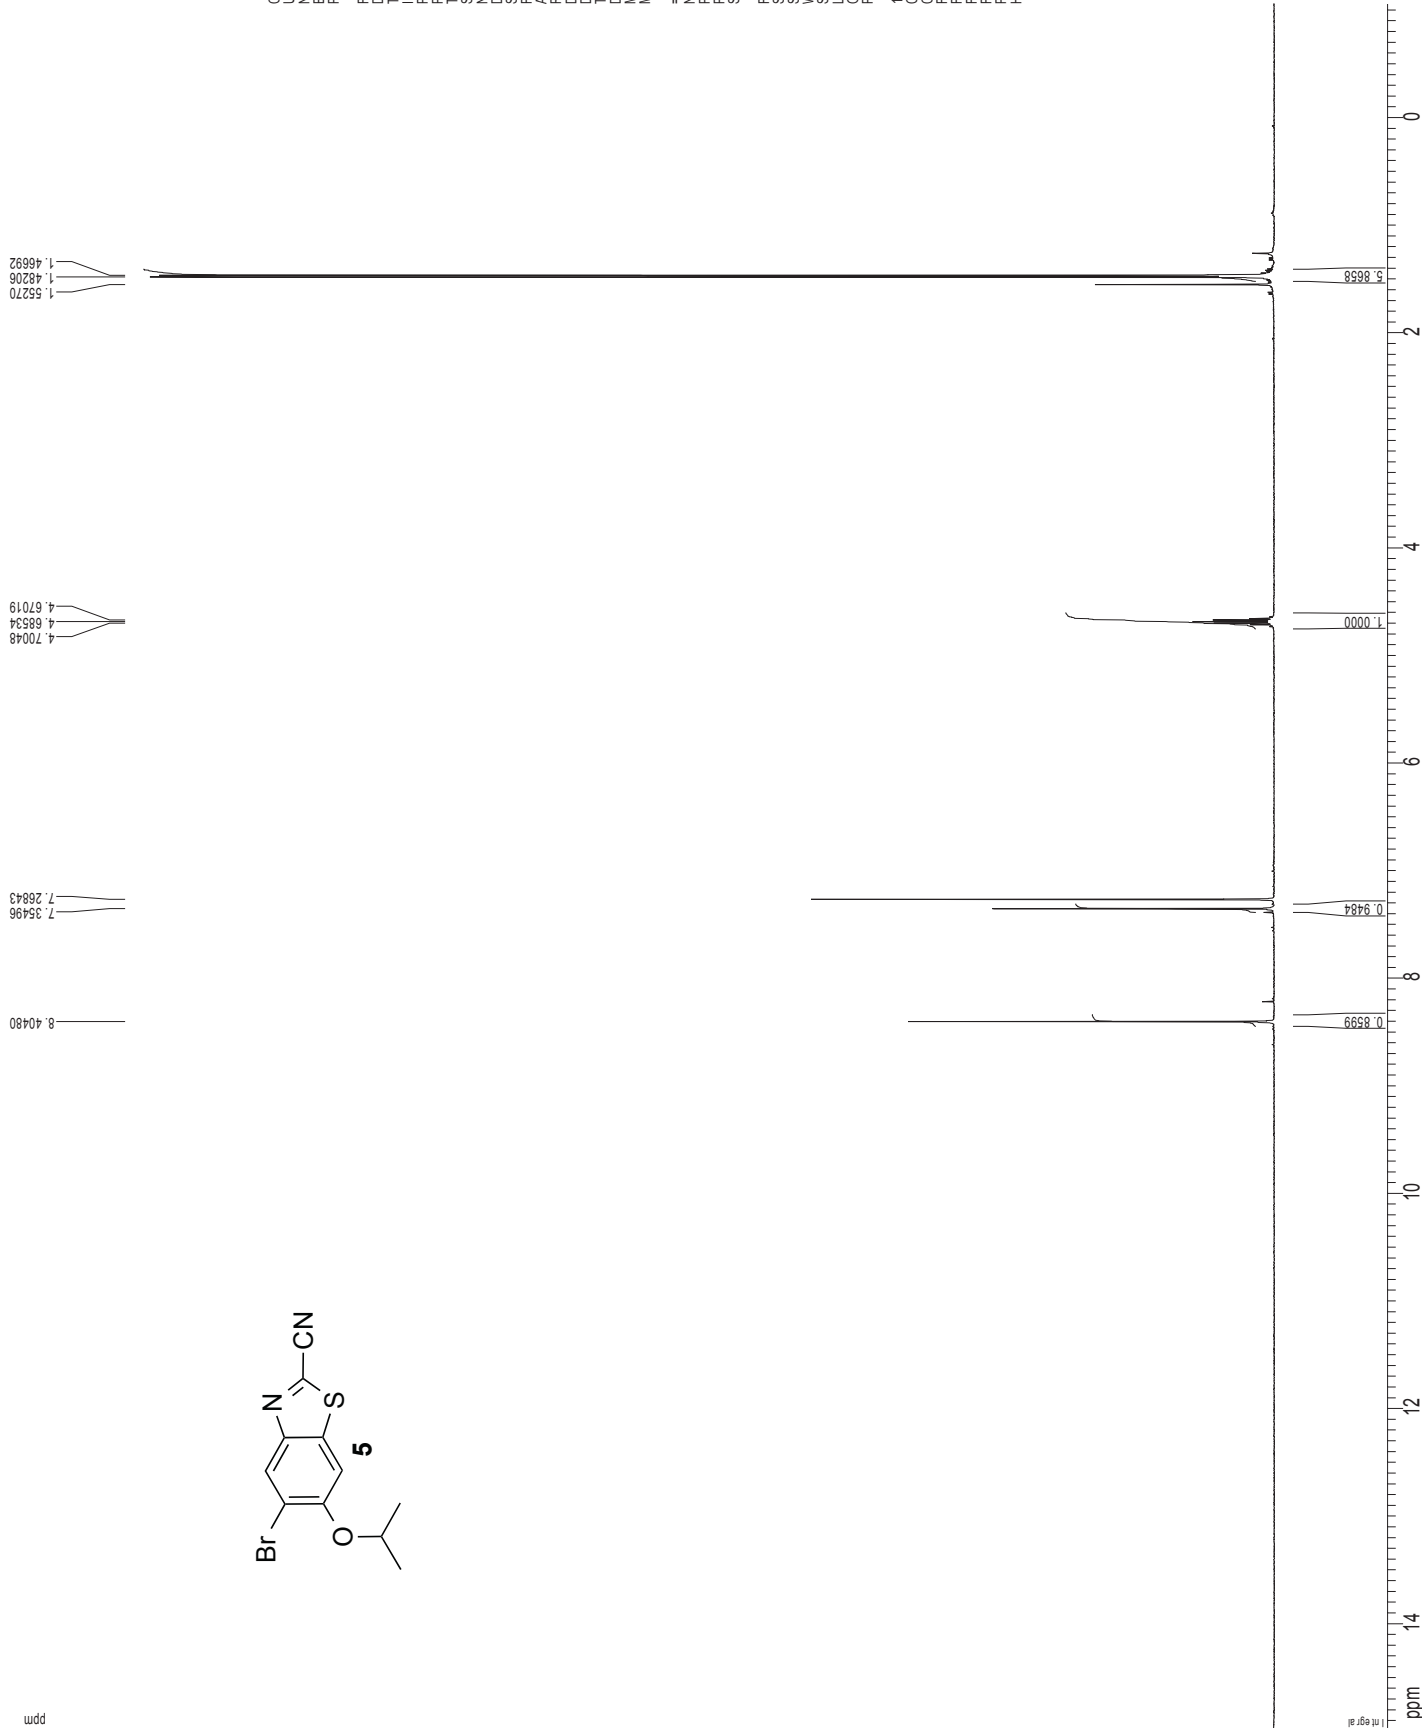

Current Data Parameters  
 USER: rander  
 NAME: 10\_284  
 EXPNO: 1  
 PROCNO: 1

F2 - Acquisition Parameters  
 Date\_ : 20141121  
 Time: 12.05  
 INSTRUM: drx400  
 PROBD: 5 mm QNP H/F/P  
 PULPROG: zgpg30  
 TD: 65536  
 SOLVENT: CDCl3  
 DS: 2  
 SFO1: 400.1328009 MHz  
 SWH: 6410.256 Hz  
 FIDRES: 0.097813 Hz  
 AQ: 5.1118579 sec  
 RG: 1024  
 DW: 78.000 usec  
 DE: 4.50 usec  
 TE: 288.0 K  
 D1: 0.1000000 sec  
 MPREST: 0.0000000 sec  
 MWRK: 0.0150000 sec

===== CHANNEL f1 =====  
 NUC1: 1H  
 P1: 12.00 usec  
 PL1: 0.00 dB  
 SFO1: 400.1328009 MHz

F2 - Processing parameters  
 SI: 65536  
 SF: 400.1300775 MHz  
 WDW: EM  
 SSB: 0  
 LB: 0.30 Hz  
 GB: 0  
 PC: 2.00

1D NMR plot parameters  
 CX: 22.80 cm  
 CY: 15.00 cm  
 F1: 14.966 ppm  
 F1: 5888.51 Hz  
 F2: -1.054 ppm  
 F2: -421.74 Hz  
 PPMCM: 0.70265 ppm/cm  
 HZCM: 281.15168 Hz/cm

Z-restored spin-echo 13C spectrum with 1H decoupling

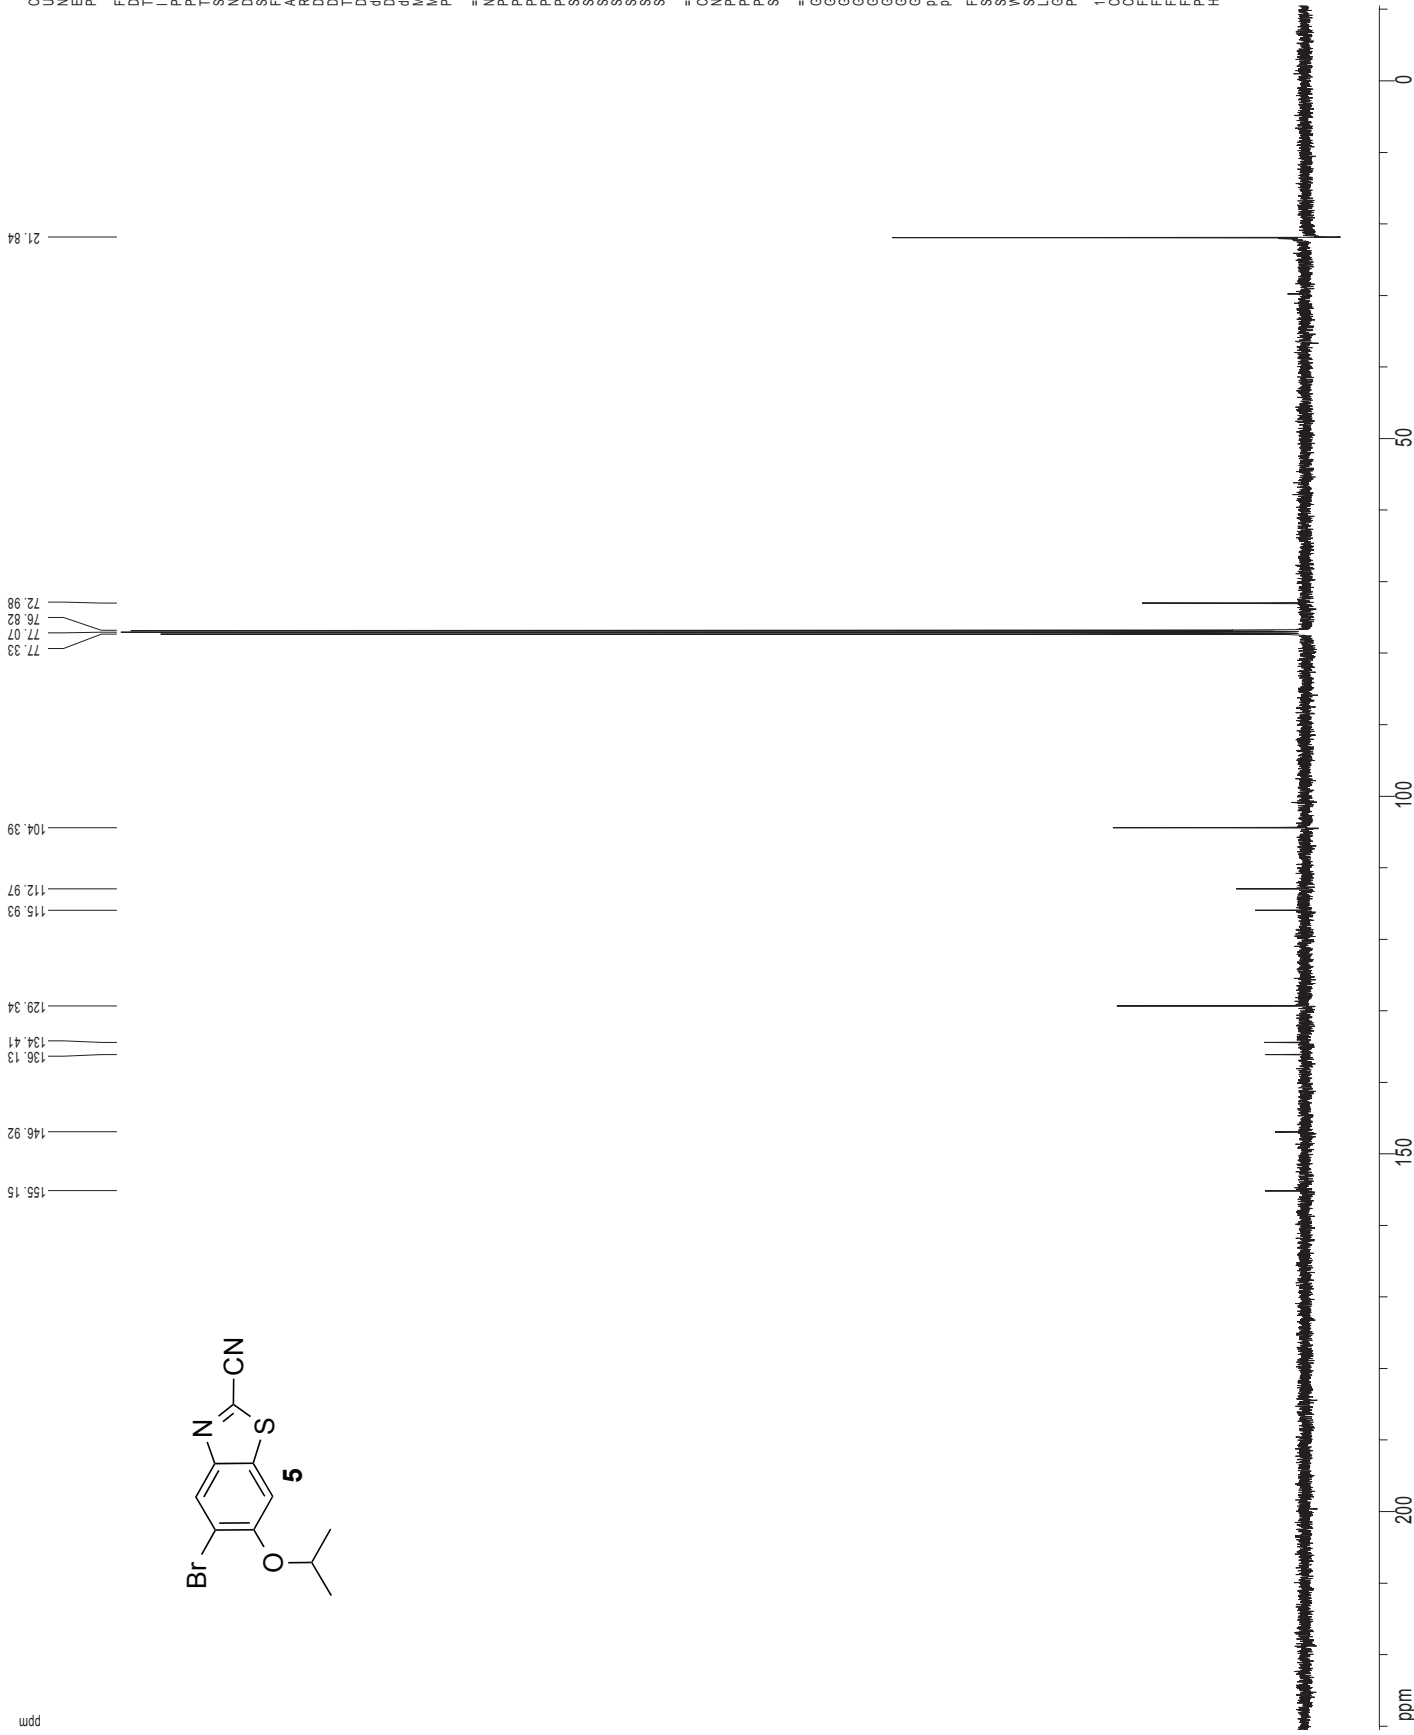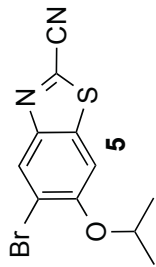

```

Current Data Parameters
NAME      R2089_13c
EXPNO    2
PROCNO   1

F2 - Acquisition Parameters
Date_    20141016
Time     14.05
INSTRUM  cpv500
PROBHD   5 mm QNP 1H-
PULPROG  SpineEcho30pp.prd
TD        65536
SOLVENT  CDCl3
DS        1024
SWH       30303.031 Hz
FIDRES    0.462388 Hz
AQ        1.0813940 sec
RG        7298.2
DW        16.500 usec
DE        6.00 usec
TE        298.0 K
D1        0.9560000 sec
d11       0.0300000 sec
D16       0.0002000 sec
d17       0.00019600 sec
MDELTA   0.0000000 sec
MDELTA2  0.01500000 sec
P2        31.00 usec

===== CHANNEL f1 =====
NUC1      13C
P1        15.50 usec
PL1       500.00 usec
P12       2000.00 usec
PL0       120.00 dB
PL1       -1.00 dB
SFO1     125.7942548 MHz
SFO2     500.2259111 MHz
SFO3     500.2259111 MHz
SFO4     500.2259111 MHz
SFO5     500.2259111 MHz
SFO6     500.2259111 MHz
SFO7     500.2259111 MHz
SFO8     500.2259111 MHz
SFO9     500.2259111 MHz
SFO10    500.2259111 MHz
SFO11    500.2259111 MHz
SFO12    500.2259111 MHz
SFO13    500.2259111 MHz
SFO14    500.2259111 MHz
SFO15    500.2259111 MHz
SFO16    500.2259111 MHz
===== CHANNEL f2 =====
CPDPRG2  waltz16
NUC2      1H
P2        100.00 usec
PL2       0.00 dB
PL0       120.00 dB
PL1       24.60 dB
SFO1     500.2259111 MHz
===== GRADIENT CHANNEL =====
GRVAM1    SINE 100
GRVAM2    SINE 100
GRX1      0.00 %
GRY1      0.00 %
GRZ1      0.00 %
GRX2      0.00 %
GRY2      0.00 %
GRZ2      0.00 %
p15       500.00 usec
p16       1000.00 usec

F2 - Processing parameters
SI        32768
SF        125.7694100 MHz
WDW       EM
SSB       0
LB        1.00 Hz
GB        0
PC        2.00

1D NMR plot parameters
XN        2560 cm
CN        15.68 cm
FIP       230.460 ppm
F1        26887.37 Hz
F2P       -10.460 ppm
F2        -1315.66 Hz
PPMCM     10.56687 ppm/cm
HZCM      1329.08032 Hz/cm
    
```



1H spectrum

ppm

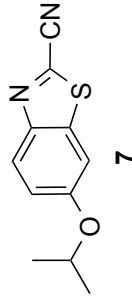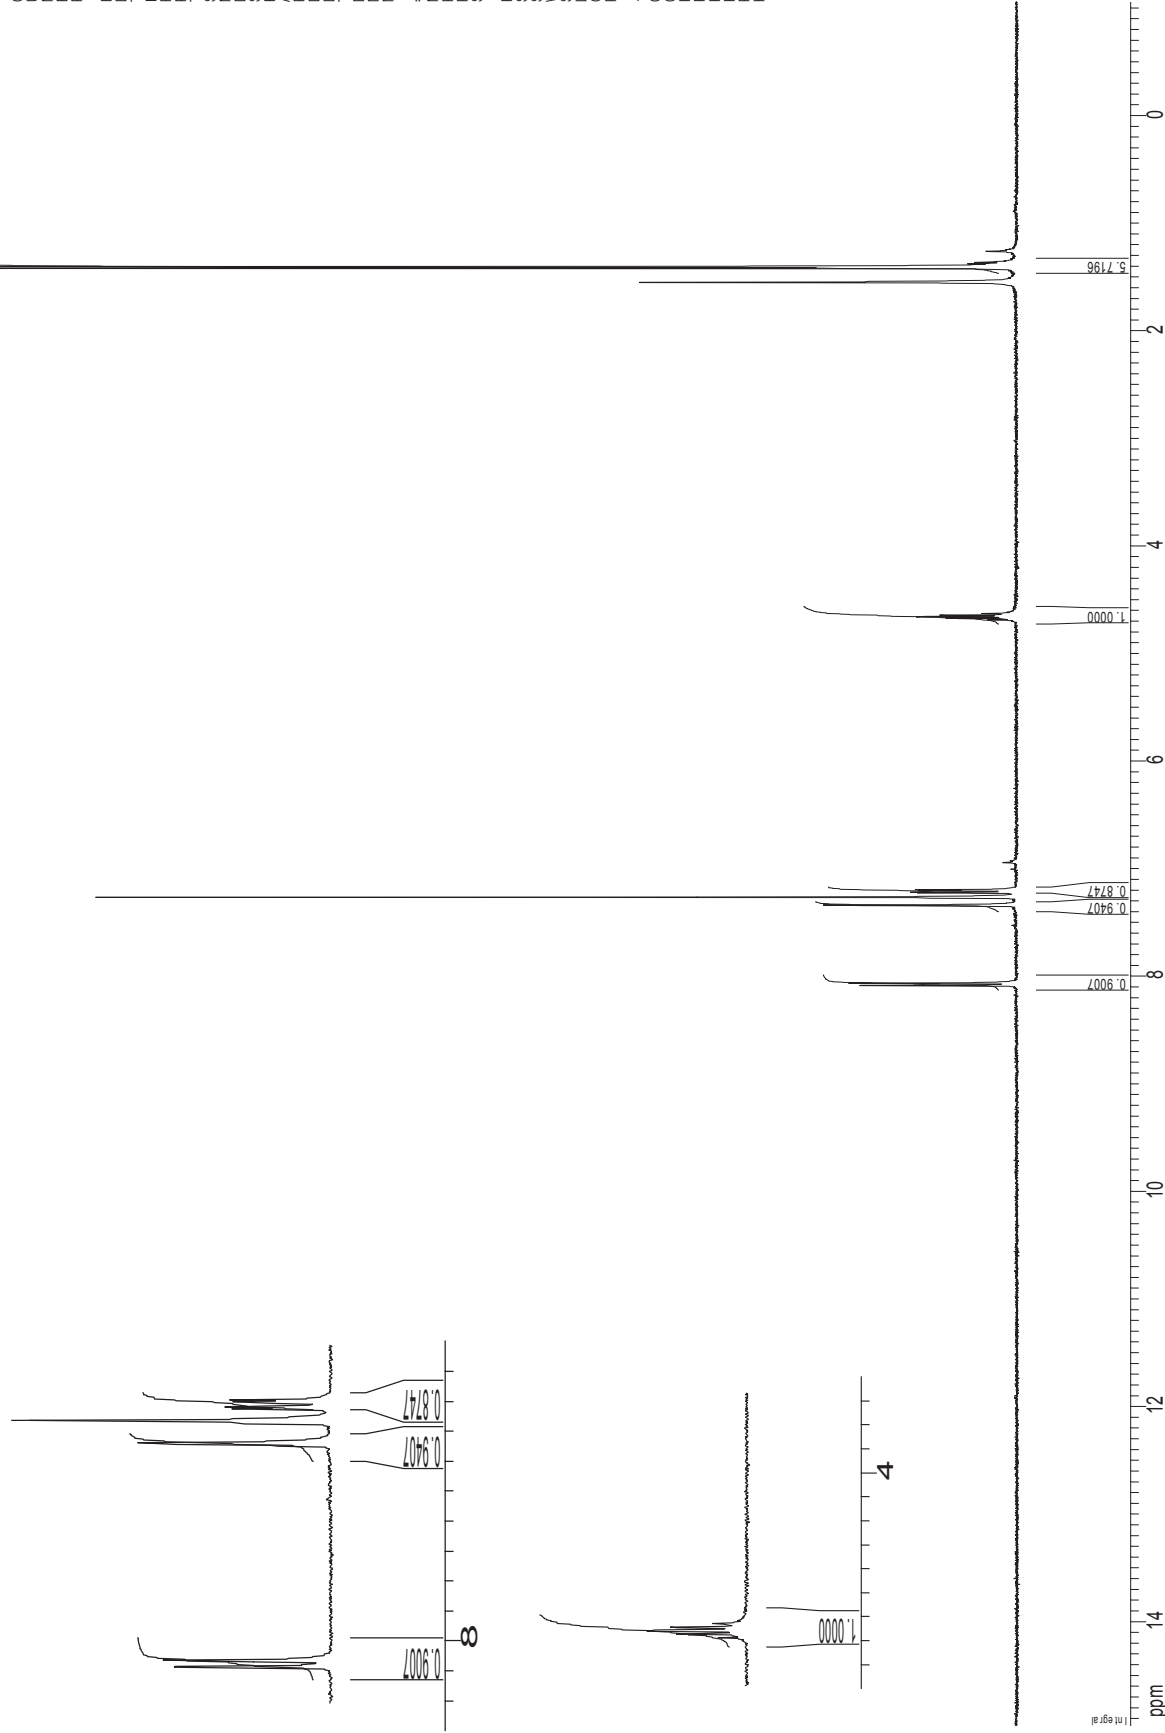

Current Data Parameters  
 USER: r1259\_11y4  
 NAME: r1259\_11y4  
 EXPNO: 1  
 PROCNO: 1

F2 - Acquisition Parameters  
 Date\_: 20141016  
 Time: 14.57  
 INSTRUM: drx400  
 PROBD: 5 mm QNP H/F/P  
 PULPROG: zgpg30  
 TD: 65536  
 SOLVENT: CDCl3  
 DS: 2  
 SWH: 6410.256 Hz  
 FIDRES: 0.092813 Hz  
 AQ: 5.1118579 sec  
 RG: 1230.2  
 DW: 78.000 usec  
 DE: 4.50 usec  
 TE: 288.0 K  
 D1: 0.1000000 sec  
 MPREST: 0.0000000 sec  
 MDMRK: 0.0150000 sec

===== CHANNEL f1 =====  
 NUC1: 1H  
 P1: 12.00 usec  
 PL1: 0.00 dB  
 SFO1: 400.1328009 MHz

F2 - Processing parameters  
 SI: 65536  
 SF: 400.1300175 MHz  
 EM: 0  
 WDW: EM  
 LB: 0.30 Hz  
 GB: 0  
 PC: 2.00

1D NMR plot parameters  
 CX: 22.80 cm  
 CY: 15.00 cm  
 F1: 14.966 ppm  
 F2: 5888.51 Hz  
 F2P: -1.054 ppm  
 F2: -421.74 Hz  
 PRMCM: 0.70265 ppm/cm  
 HZCM: 281.15168 Hz/cm

Z-restored spin-echo <sup>13</sup>C spectrum with <sup>1</sup>H decoupling

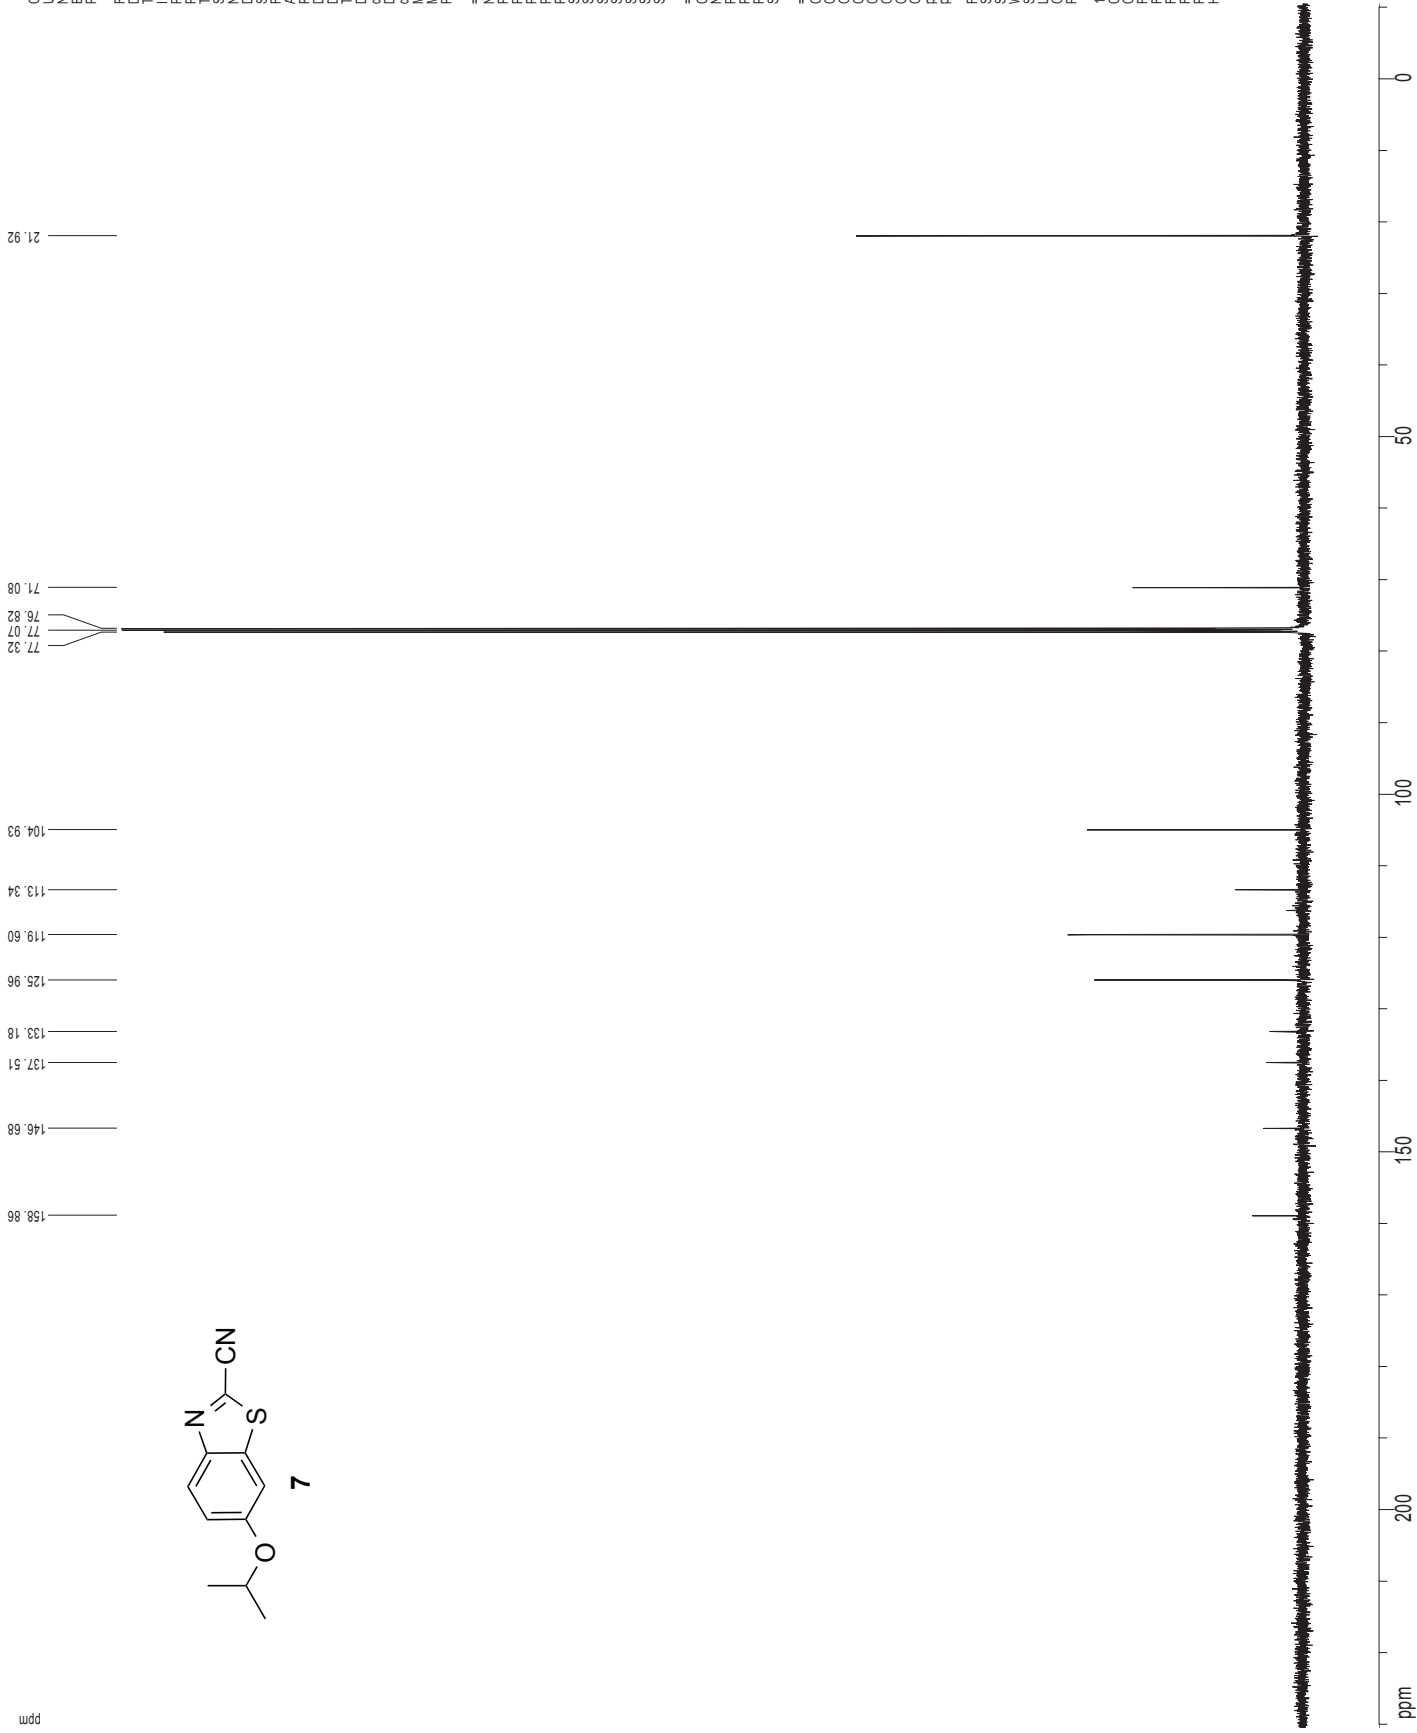

Current Data Parameters  
 USER: rachel  
 NAME: R2269\_13c  
 EXPNO: 2  
 PROCNO: 1  
 F2 - Acquisition Parameters  
 Date\_ : 20140929  
 Time: 17.12  
 INSTRUM: cryo500  
 PROBHD: 5 mm QNP 1H-  
 PULPROG: SpinEcho30pp.prd  
 TD: 65536  
 SOLVENT: CDCl3  
 NS: 1024  
 DS: 4  
 SWH: 30303.031 Hz  
 FIDRES: 0.462388 Hz  
 AQ: 1.0613940 sec  
 RG: 7298.2  
 DW: 16.500 usec  
 DE: 6.00 usec  
 TE: 298.0 K  
 D1: 0.9560000 sec  
 d11: 0.0300000 sec  
 D16: 0.0002000 sec  
 d17: 0.00019600 sec  
 ACQRES: 0.0000000 sec  
 MDWPK: 0.01500000 sec  
 P2: 31.00 usec  
 ===== CHANNEL f1 =====  
 NUC1: <sup>13</sup>C  
 P1: 15.50 usec  
 PL1: 500.00 usec  
 PL2: 2000.00 usec  
 PL0: 120.00 dB  
 PL1: -1.00 dB  
 SFO1: 125.7942548 MHz  
 SF1: 3.20 dB  
 SFO2: 500.1360000 MHz  
 SF2: 3.20 dB  
 GRAMP1: 0 p60, 5, 20, 4  
 GRAMP2: 0 p60, 5, 20, 4  
 SPOFF1: 0.00 Hz  
 SPOFF2: 0.00 Hz  
 ===== CHANNEL f2 =====  
 CPDPRG2: waltz16  
 NUC2: <sup>1</sup>H  
 P2: 100.00 usec  
 PL2: 1.00 dB  
 PL12: 24.60 dB  
 SF02: 500.2259111 MHz  
 ===== GRADIENT CHANNEL =====  
 GRVAM1: SINE, 100  
 GRVAM2: SINE, 100  
 GRX1: 0.00 %  
 GRX2: 0.00 %  
 GRZ1: 0.00 %  
 GRZ2: 0.00 %  
 GRZ3: 0.00 %  
 p15: 500.00 usec  
 p16: 1000.00 usec  
 F2 - Processing parameters  
 SI: 65536  
 SF: 125.7694254 MHz  
 VWDW: EM  
 SSB: 0  
 LB: 1.00 Hz  
 GB: 0  
 PC: 2.00  
 1D NMR plot parameters  
 X: 20.00 cm  
 Y: 45.00 cm  
 F1P: 230.460 ppm  
 F1: 26887.37 Hz  
 F2P: -10.460 ppm  
 F2: -1315.66 Hz  
 PPMCM: 10.56887 ppm/cm  
 HZCM: 1329.08032 Hz/cm

1H spectrum

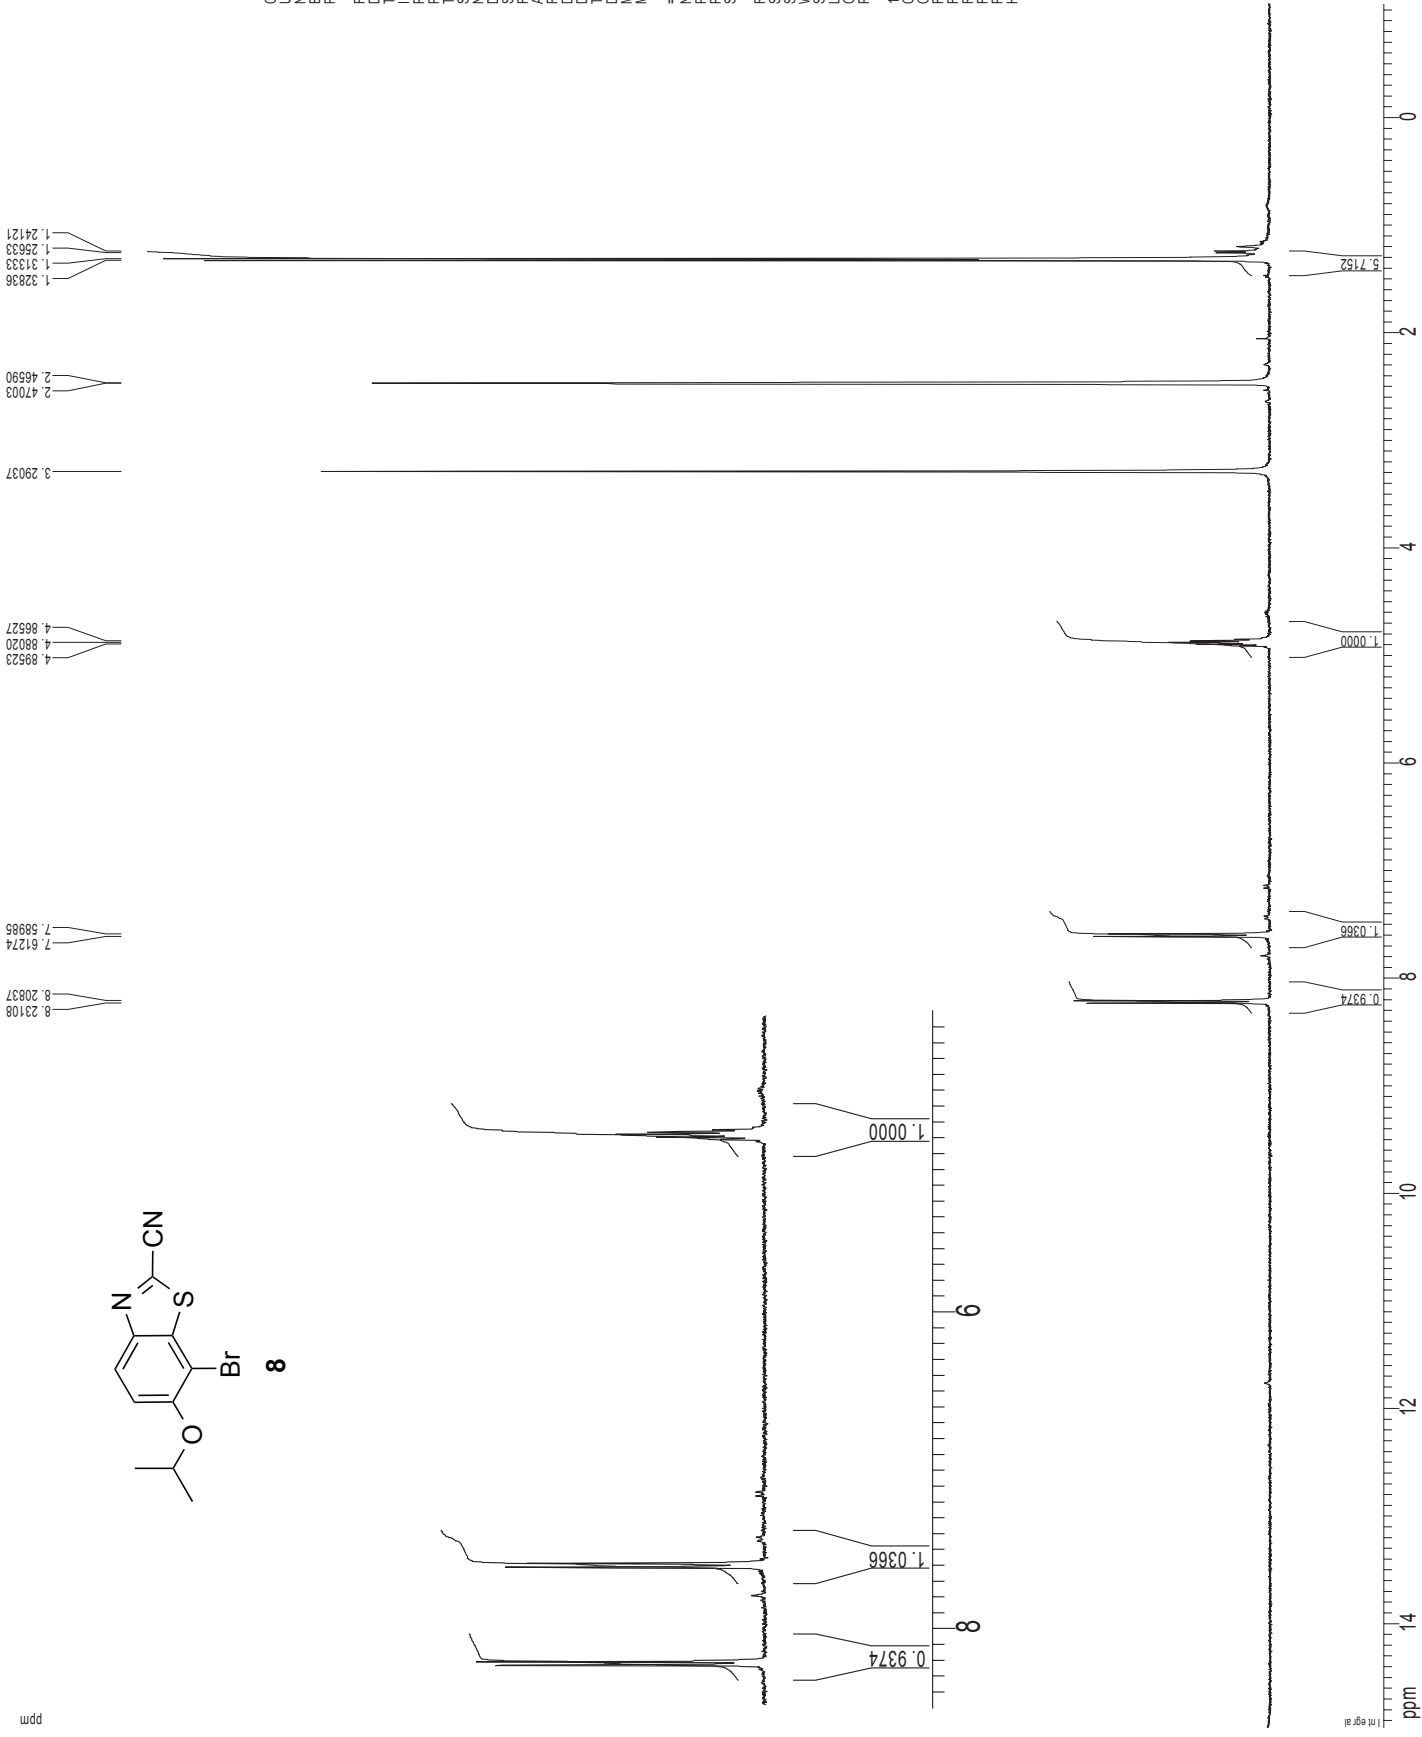

8

Current Data Parameters  
Date\_ 20141007  
Time\_ 16.55  
INSTRUM drx400  
PROBHD 5 mm QNP H/F/P  
PULPROG zg30  
TD 65536  
SOLVENT DMSO  
DS 2  
SS 2  
SF 6410.256 Hz  
FIDRES 0.097813 Hz  
AQ 5.1118579 sec  
RG 1149.4  
DW 78.000 usec  
DE 4.50 usec  
TE 288.0 K  
D1 0.1000000 sec  
MPREST 0.0000000 sec  
MDWRK 0.0150000 sec  
===== CHANNEL f1 =====  
NUC1 <sup>1</sup>H  
P1 12.00 usec  
PL1 0.00 dB  
SFO1 400.1328009 MHz  
F2 - Processing parameters  
SI 65536  
SF 400.1300175 MHz  
WDW EM  
SSB 0  
LB 0.30 Hz  
GB 0  
PC 2.00  
ID NMRplot parameters  
CY 22.80 cm  
CX 15.00 cm  
FIP 14.966 ppm  
F1 5888.51 Hz  
F2P -1.054 ppm  
F2 -421.74 Hz  
PRCM 0.70265 ppm/cm  
HZCM 281.15168 Hz/cm

Z-restored spin-echo <sup>13</sup>C spectrum with <sup>1</sup>H decoupling

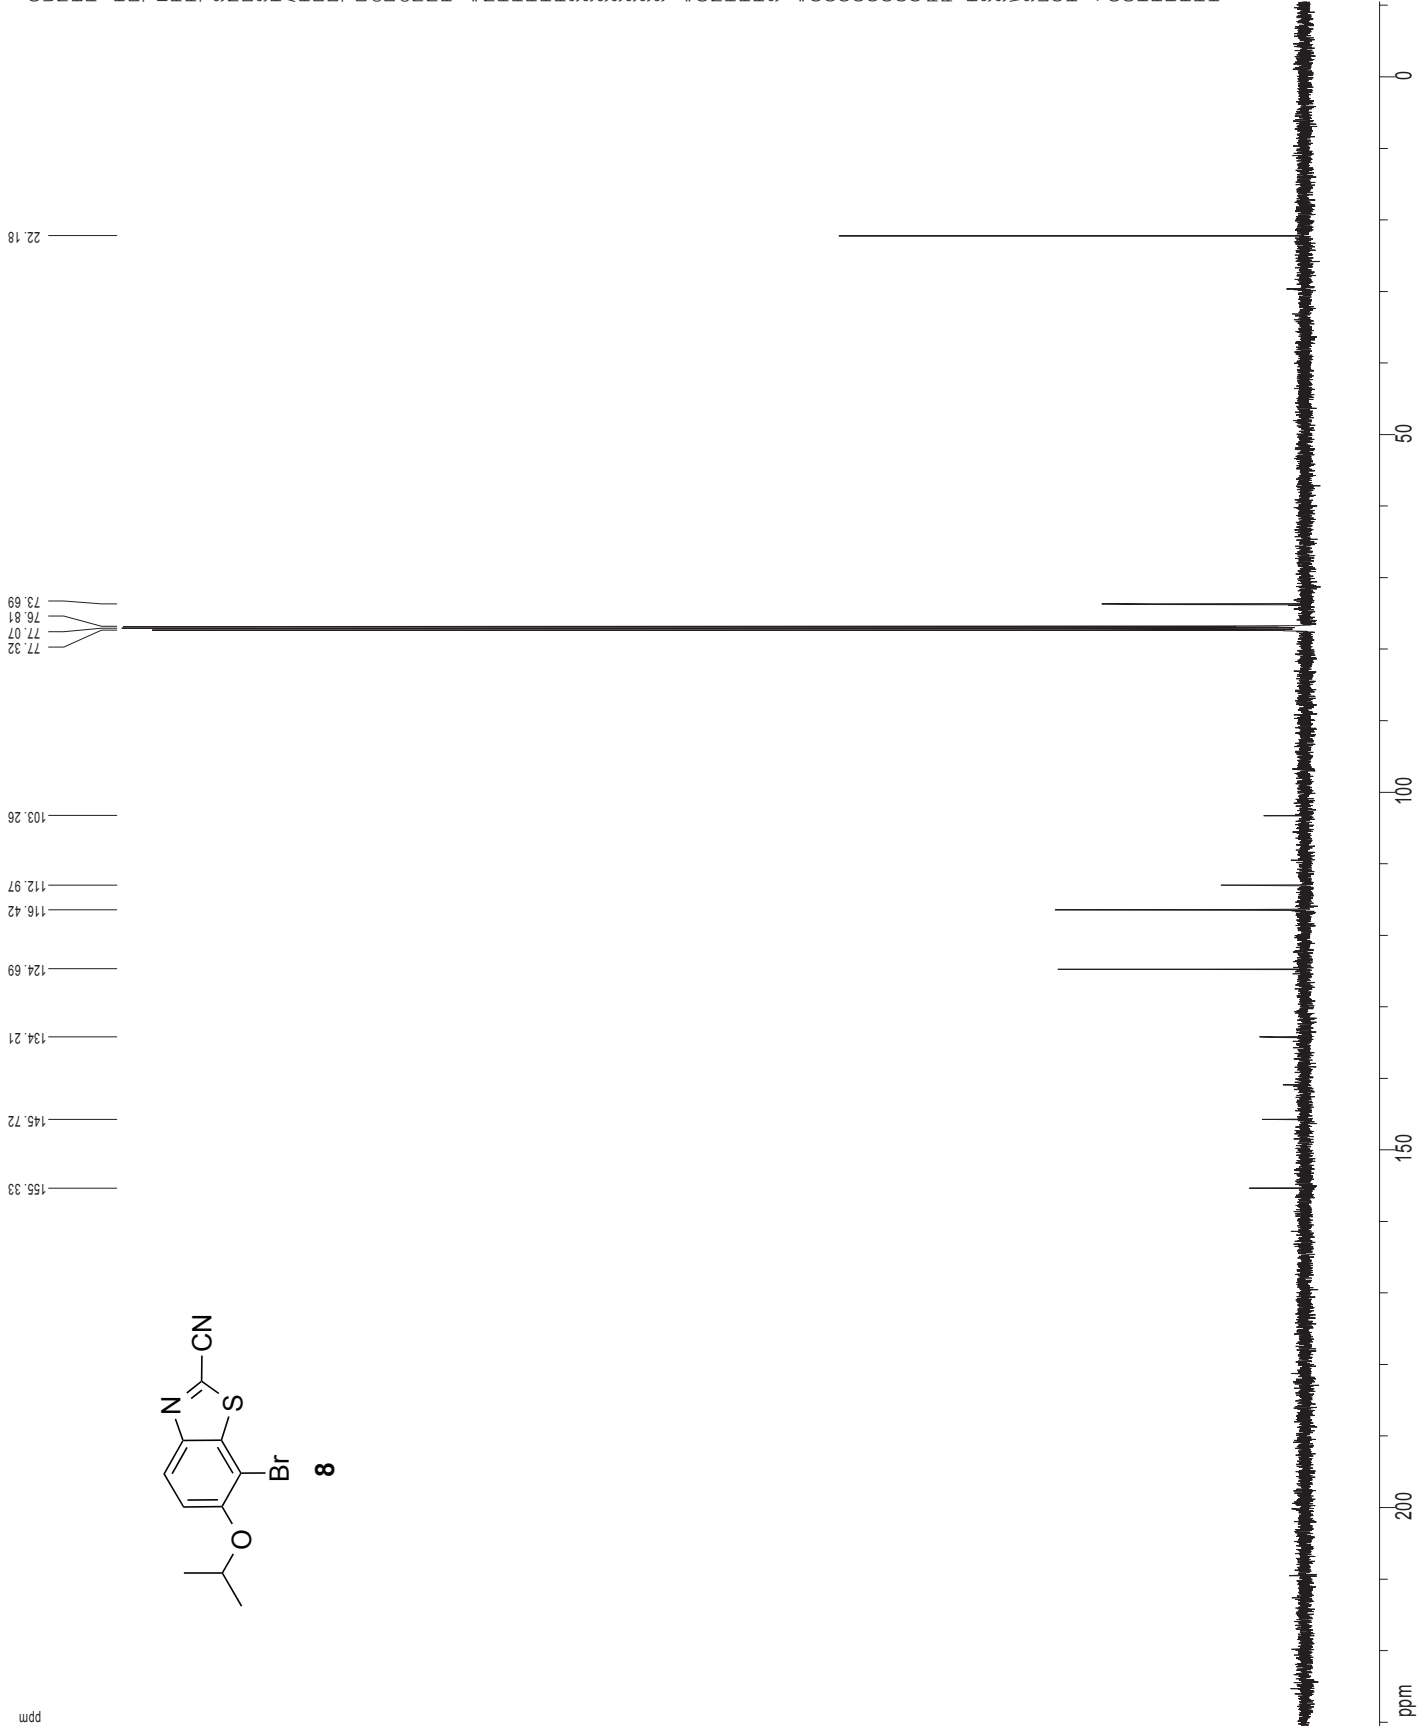

```

Current Data Parameters
=====
USER          rachel
NAME          RB190_cr1o13c
EXPNO         2
PROCNO        1
F2 - Acquisition Parameters
=====
Date_         20140712
Time          19.28
INSTRUM       cryo500
PROBHD        5 mm QNP1H-
PULPROG       SpinEcho30pp.prd
TD            65536
SOLVENT       CDCl3
NS            1024
DS            4
SWH           30303.031 Hz
FIDRES        0.462388 Hz
AQ            1.0813940 sec
RG            7298.2
DW            16.500 usec
DE            6.00 usec
TE            298.0 K
d1            0.9560000 sec
d11           0.0300000 sec
d16           0.0002000 sec
d17           0.00019800 sec
d17           0.00000000 sec
d17           0.00000000 sec
d17           0.01500000 sec
d17           31.00 usec
MORPH         0
MORPH         0
SFOFF1        0.00 Hz
SFOFF2        0.00 Hz
===== CHANNEL f1 =====
NUC1          13C
P1            15.50 usec
PT1           500.00 usec
P12           2000.00 usec
PL0           120.00 dB
PL1           -1.00 dB
SFO1         125.7942548 MHz
SP1           3.20 dB
SFOFF1        0.00 Hz
SFOFF2        0.00 Hz
===== CHANNEL f2 =====
CPDPRG2       waltz16
NUC2          1H
P2            100.00 usec
PT2           2000.00 usec
PL0           24.60 dB
PL1           -1.00 dB
SFO2         500.2259111 MHz
===== GRADIENT CHANNEL =====
GRVAM1        SINE 100
GRVAM2        SINE 100
GXY1          0.00 %
GXY2          0.00 %
GXY3          0.00 %
GZ1           30.00 %
GZ2           50.00 %
GZ3           50.00 %
p15           500.00 usec
p16           1000.00 usec
F2 - Processing parameters
=====
SI            65536
SF            125.7694101 MHz
WDW           EM
SSB           0
LB            1.00 Hz
GB            0
PC            2.00
ID NMR plot parameters
=====
AQ           12.00 cm
CX           15.68 cm
CY           230.460 ppm
F1           28887.37 Hz
F2           -10.460 ppm
F2           -1315.66 Hz
P1MCM        10.56887 ppm/cm
F2MCM        1329.08032 Hz/cm
    
```

1H spectrum

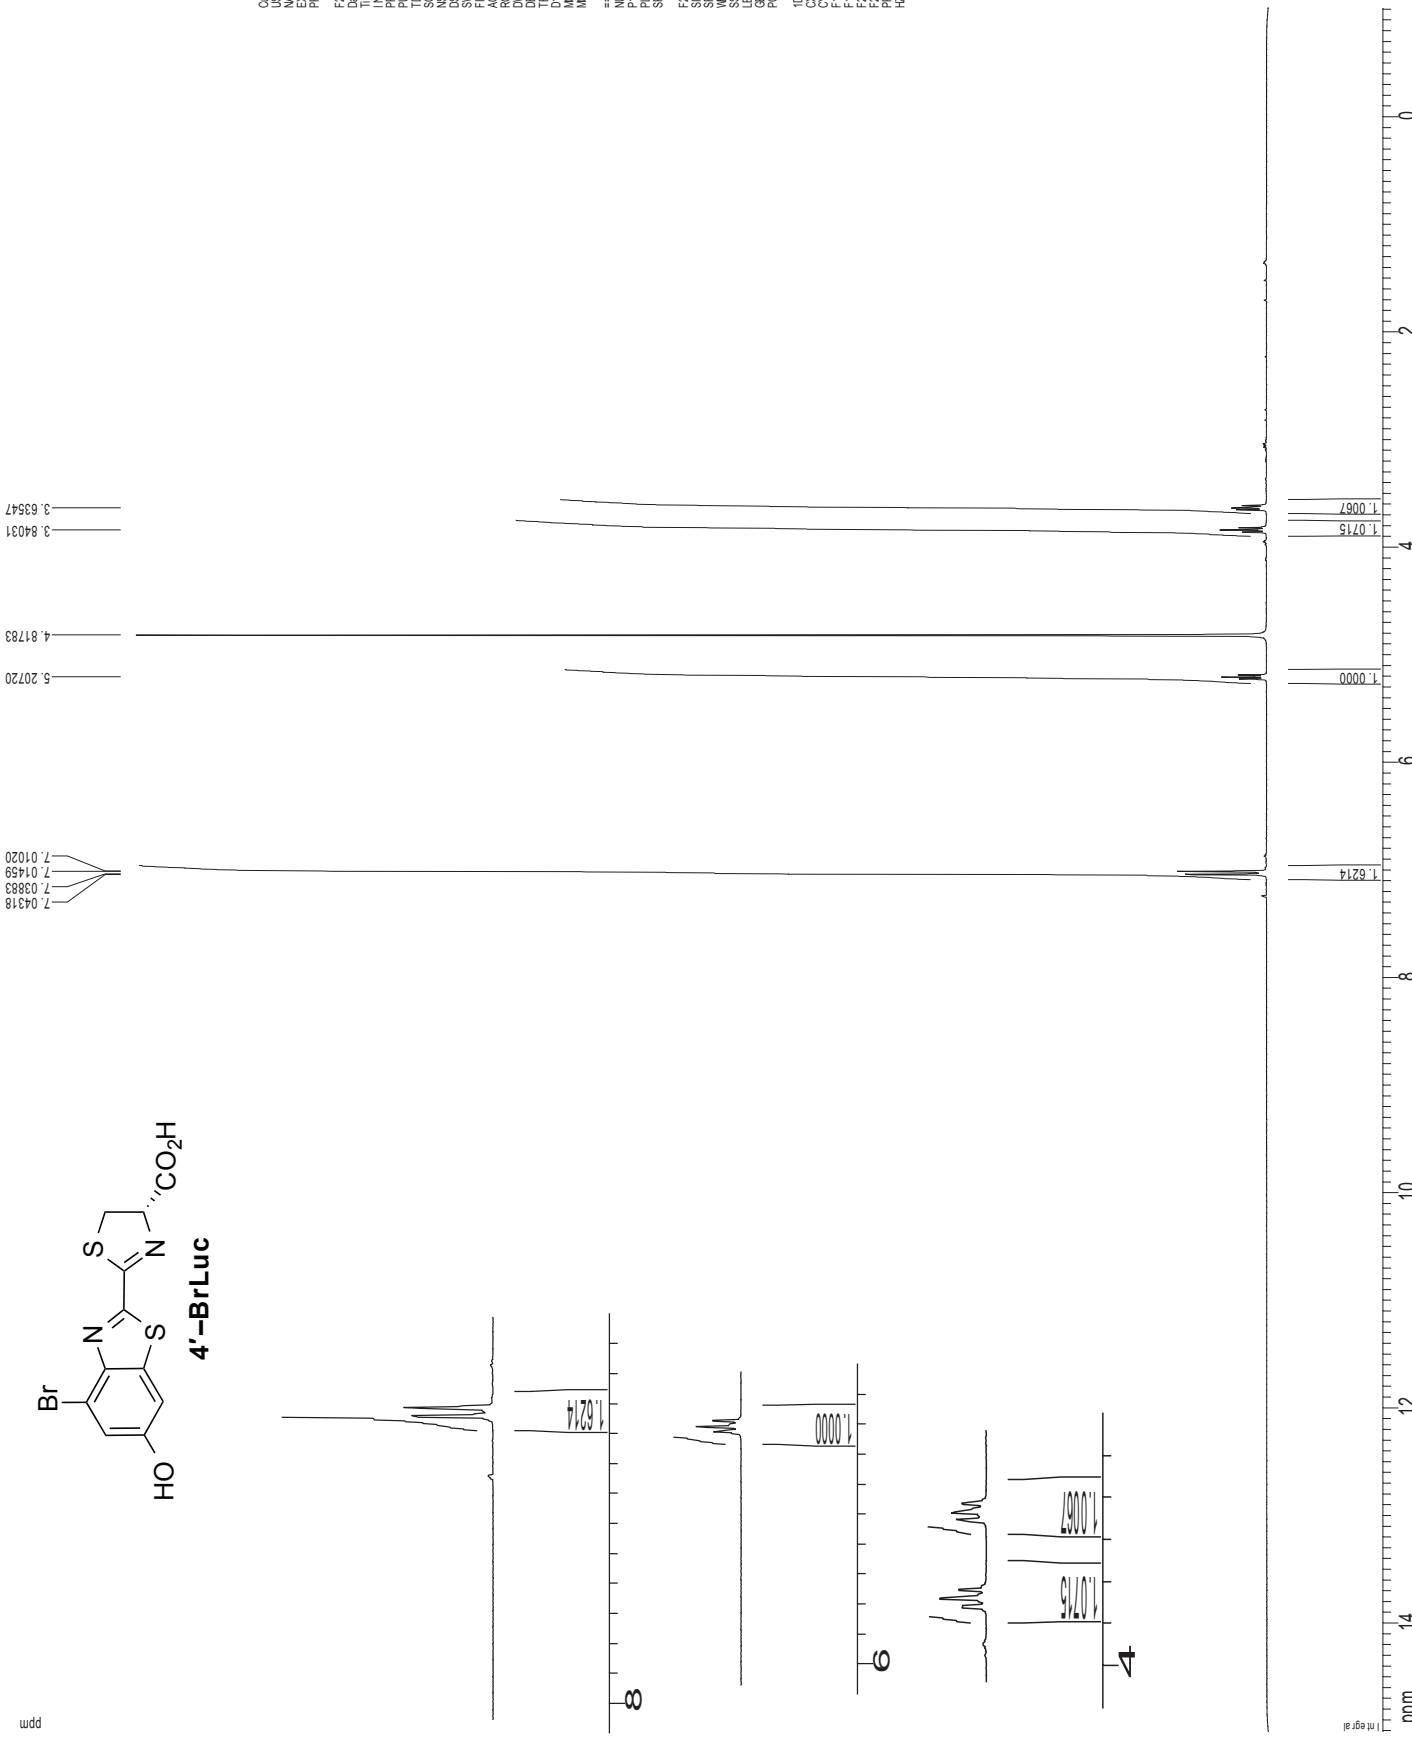

Current Data Parameters  
 USER: rachel  
 NAME: r\_batromoluciferin\_d1yo  
 EXPNO: 1  
 PROCNO: 1

F2 - Acquisition Parameters  
 Date\_: 20141117  
 Time: 8:16  
 INSTRUM: cryo60  
 PROCNO: 5 mmCFC1 1H  
 PULPROG: zg30  
 TD: 81728  
 SFO1: 500  
 AQ: 0.02000000  
 NS: 2  
 DS: 2  
 SWH: 8012.820 Hz  
 FIDRES: 0.098943 Hz  
 AQ: 5.0391676 sec  
 RG: 327  
 DW: 62.400 usec  
 DE: 6.00 usec  
 TE: 299.2 K  
 D1: 0.10000000 sec  
 MPRST: 0.00000000 sec  
 MCHNK: 0.01500000 sec

===== CHANNEL f1 =====  
 NUC1: 1H  
 P1: 7.50 usec  
 PL1: 1.60 dB  
 SFO1: 500.233015 MHz

F2 - Processing parameters  
 SI: 65536  
 SF: 500.2200000 MHz  
 WDW: EM  
 SSB: 0  
 GB: 0  
 PC: 4.00

ID: MR pilot parameters  
 CY: 22.80 cm  
 CX: 15.00 cm  
 FIP: 15.008 ppm  
 F1: 7507.95 Hz  
 F2: 7507.95 Hz  
 F3: -504.81 ppm  
 PPM0: 0.710257 ppm/cm  
 HZ0: 351.43951 Hz/cm

Z-restored spin-echo <sup>13</sup>C spectrum with <sup>1</sup>H decoupling

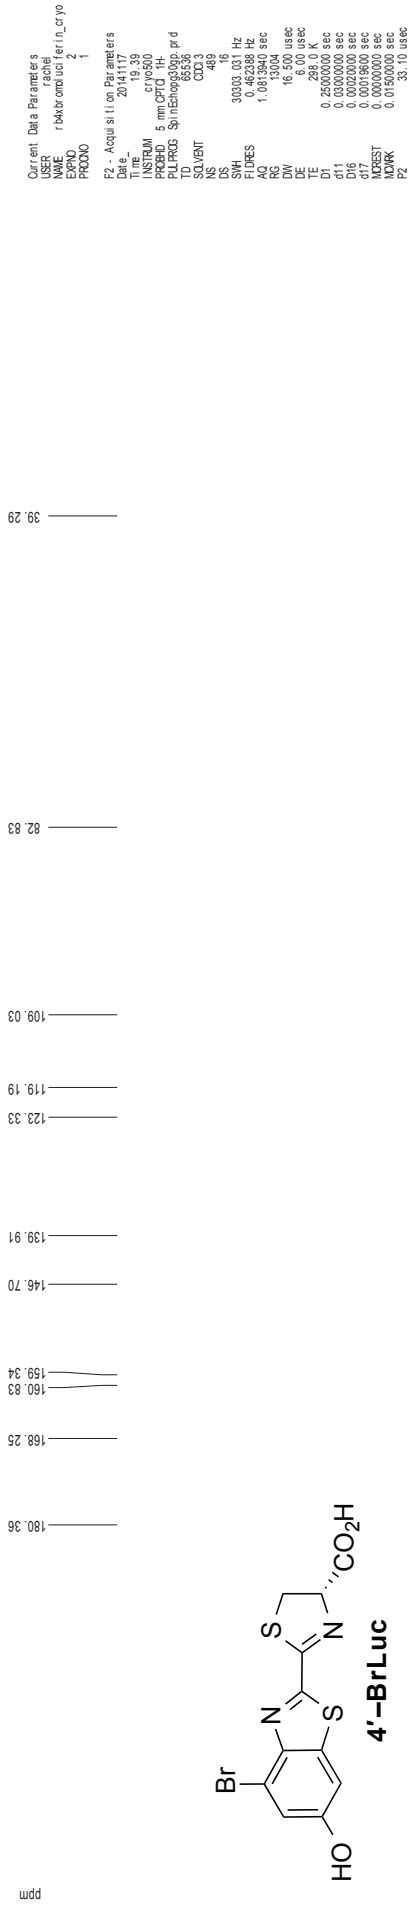

Current Data Parameters  
 USER: rbatard  
 EXPNO: 4  
 PROCNO: 1

F2 - Acquisition Parameters  
 Date\_ : 2018.10.10  
 Time : 18.30  
 INSTRUM: crys500  
 PROBHD: 5 mmCPYH-1H-13C  
 PULPROG: SpinEchoSgprd  
 D1: 0.500000 sec  
 SFO1: 125.760348 MHz  
 SFO2: 500.136450 MHz  
 SOLVENT: CDCl3  
 NS: 489  
 DS: 16  
 SH: 3000.000 Hz  
 AQ: 0.050000 sec  
 AD: 1.081246 sec  
 RG: 13004  
 DW: 16.500 usec  
 DE: 5.000 usec  
 TE: 29.500000 sec  
 d11: 0.25000000 sec  
 d16: 0.03000000 sec  
 d18: 0.00200000 sec  
 d19: 0.00150000 sec  
 d20: 0.00150000 sec  
 d21: 0.00150000 sec  
 d22: 0.00150000 sec  
 MARK: 0.01500000 sec  
 P2: 33.10 usec

==== CHANNEL f1 =====  
 NUC1: 13C  
 P1: 16.55 usec  
 P11: 500.00 usec  
 P12: 2000.00 usec  
 PL1: 120.00 dB  
 PL2: 120.00 dB  
 SFO1: 125.760348 MHz  
 SFO2: 500.136450 MHz  
 SP1: 2.70 dB  
 SP2: 2.70 dB  
 SPHM: Cp60.0.5.20.1  
 SPM1: Cp60.0.5.20.1  
 SFOFF1: 0.00 Hz  
 SFOFF2: 0.00 Hz

==== CHANNEL f2 =====  
 CPDPRG2: waltz16  
 NUC2: 1H  
 P2: 100.00 usec  
 PL2: 2.160 dB  
 PL3: 2.160 dB  
 SFO2: 500.222801 MHz

==== GRABNT CHANNEL =====  
 GRABM1: SINE 100  
 GRABM2: SINE 100  
 GRABF1: 0.00 %  
 GRABF2: 0.00 %  
 GRABF3: 0.00 %  
 GRABF4: 0.00 %  
 GRABF5: 0.00 %  
 GRABF6: 0.00 %  
 GRABF7: 0.00 %  
 GRABF8: 0.00 %  
 GRABF9: 0.00 %  
 GRABF10: 0.00 %  
 GRABF11: 0.00 %  
 GRABF12: 0.00 %  
 GRABF13: 0.00 %  
 GRABF14: 0.00 %  
 GRABF15: 0.00 %  
 GRABF16: 0.00 %  
 GRABF17: 0.00 %  
 GRABF18: 0.00 %  
 GRABF19: 0.00 %  
 GRABF20: 0.00 %  
 GRABF21: 0.00 %  
 GRABF22: 0.00 %  
 GRABF23: 0.00 %  
 GRABF24: 0.00 %  
 GRABF25: 0.00 %  
 GRABF26: 0.00 %  
 GRABF27: 0.00 %  
 GRABF28: 0.00 %  
 GRABF29: 0.00 %  
 GRABF30: 0.00 %  
 GRABF31: 0.00 %  
 GRABF32: 0.00 %  
 GRABF33: 0.00 %  
 GRABF34: 0.00 %  
 GRABF35: 0.00 %  
 GRABF36: 0.00 %  
 GRABF37: 0.00 %  
 GRABF38: 0.00 %  
 GRABF39: 0.00 %  
 GRABF40: 0.00 %  
 GRABF41: 0.00 %  
 GRABF42: 0.00 %  
 GRABF43: 0.00 %  
 GRABF44: 0.00 %  
 GRABF45: 0.00 %  
 GRABF46: 0.00 %  
 GRABF47: 0.00 %  
 GRABF48: 0.00 %  
 GRABF49: 0.00 %  
 GRABF50: 0.00 %  
 GRABF51: 0.00 %  
 GRABF52: 0.00 %  
 GRABF53: 0.00 %  
 GRABF54: 0.00 %  
 GRABF55: 0.00 %  
 GRABF56: 0.00 %  
 GRABF57: 0.00 %  
 GRABF58: 0.00 %  
 GRABF59: 0.00 %  
 GRABF60: 0.00 %  
 GRABF61: 0.00 %  
 GRABF62: 0.00 %  
 GRABF63: 0.00 %  
 GRABF64: 0.00 %  
 GRABF65: 0.00 %  
 GRABF66: 0.00 %  
 GRABF67: 0.00 %  
 GRABF68: 0.00 %  
 GRABF69: 0.00 %  
 GRABF70: 0.00 %  
 GRABF71: 0.00 %  
 GRABF72: 0.00 %  
 GRABF73: 0.00 %  
 GRABF74: 0.00 %  
 GRABF75: 0.00 %  
 GRABF76: 0.00 %  
 GRABF77: 0.00 %  
 GRABF78: 0.00 %  
 GRABF79: 0.00 %  
 GRABF80: 0.00 %  
 GRABF81: 0.00 %  
 GRABF82: 0.00 %  
 GRABF83: 0.00 %  
 GRABF84: 0.00 %  
 GRABF85: 0.00 %  
 GRABF86: 0.00 %  
 GRABF87: 0.00 %  
 GRABF88: 0.00 %  
 GRABF89: 0.00 %  
 GRABF90: 0.00 %  
 GRABF91: 0.00 %  
 GRABF92: 0.00 %  
 GRABF93: 0.00 %  
 GRABF94: 0.00 %  
 GRABF95: 0.00 %  
 GRABF96: 0.00 %  
 GRABF97: 0.00 %  
 GRABF98: 0.00 %  
 GRABF99: 0.00 %  
 GRABF100: 0.00 %

F2 - Processing parameters  
 SI: 65536  
 SF: 125.760348 MHz  
 WDW: EM  
 SS: 0  
 GB: 0  
 PC: 2.00

==== NMR plot parameters =====  
 CO: 80 cm  
 CY: 15.65 cm  
 F1: 233.125 ppm  
 F2: 25322.47 Hz  
 ZP: -589.56 ppm  
 PPM0: 10.56570 ppm/cm  
 HZ0: 1329.08032 Hz/cm

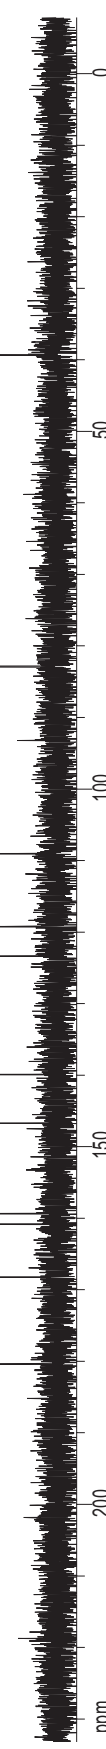

1H spectrum

ppm

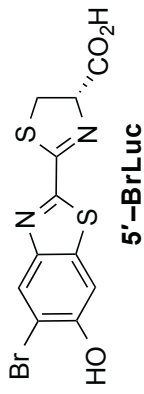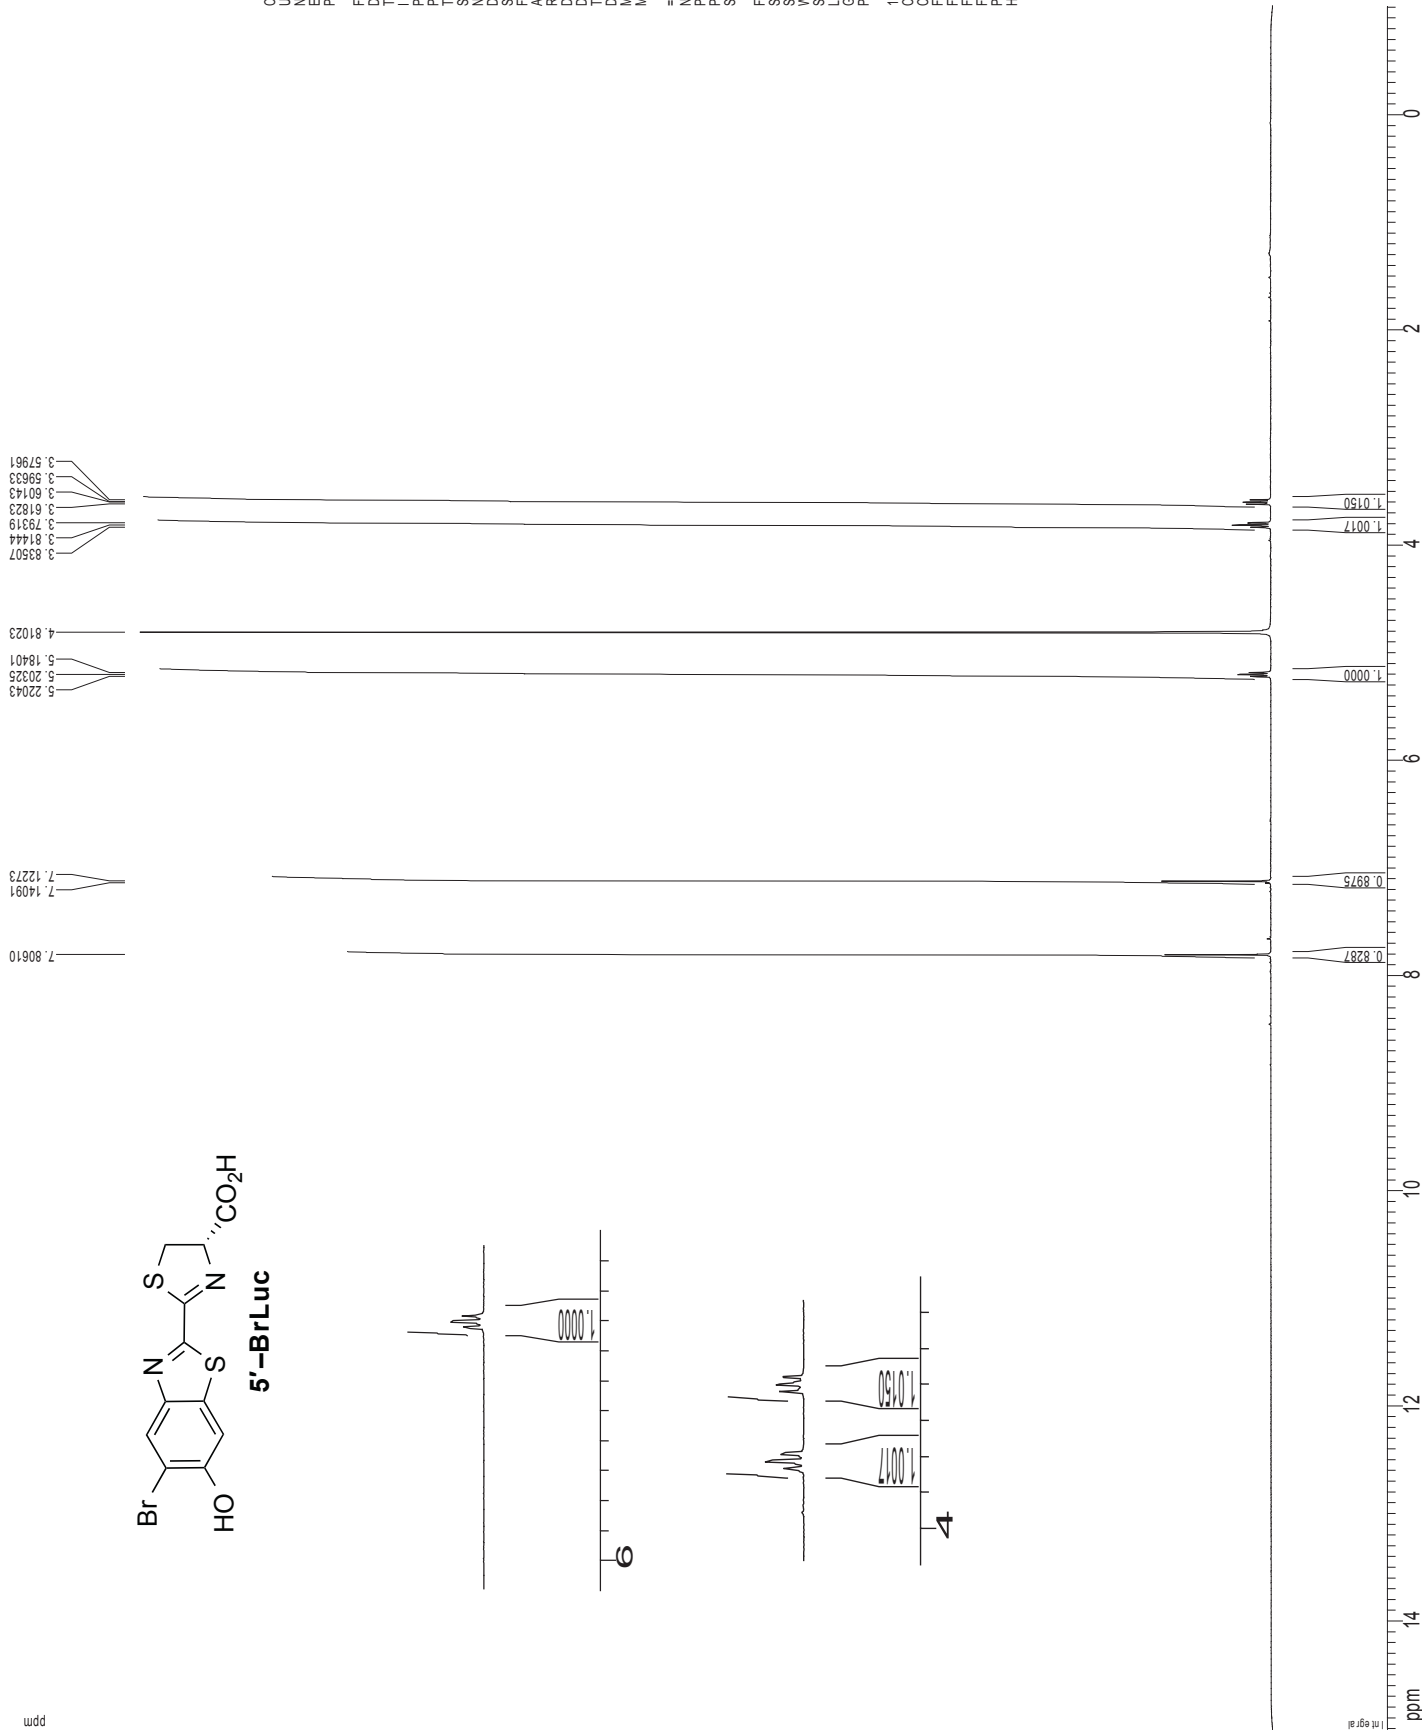

Current Data Parameters  
 USER Rachel  
 NAME r1\_br omp  
 EXPNO 1  
 PROCNO 1

F2 - Acquisition Parameters  
 Date\_ 20150118  
 Time 17.11  
 INSTRUM cryso500  
 PULPROG zgpg30  
 PROCNO 5 mmCP1H  
 TD 65536  
 FIDRES 0.098043 Hz  
 SOLVENT D2O  
 NS 8  
 DS 2  
 SWH 8012.820 Hz  
 FIDRES 0.098043 Hz  
 AQ 5.098774 sec  
 RG 6.3  
 DW 62.400 usec  
 DE 6.00 usec  
 TE 298.0 K  
 D1 0.1000000 sec  
 D11 0.0000000 sec  
 MDPRG 0.01500000 sec

===== CHANNEL f1 =====  
 NUC1 1H  
 P1 7.50 usec  
 PL1 1.60 dB  
 SFO1 500.2238015 MHz

F2 - Processing parameters  
 SI 65536  
 SF 500.2200000 MHz  
 EN  
 NDW 0  
 SSB 0  
 GB 0  
 CB 0  
 PC 4.00

1D NMR plot parameters  
 CX 22.80 cm  
 CY 15.00 cm  
 FIP 15.009 ppm  
 F1 7507.95 Hz  
 F2P -1.009 ppm  
 F2 -594.87 Hz  
 PRMCM 0.70257 ppm/cm  
 HCM 351.49851 Hz/cm

Z-restored spin-echo <sup>13</sup>C spectrum with 1H decoupling

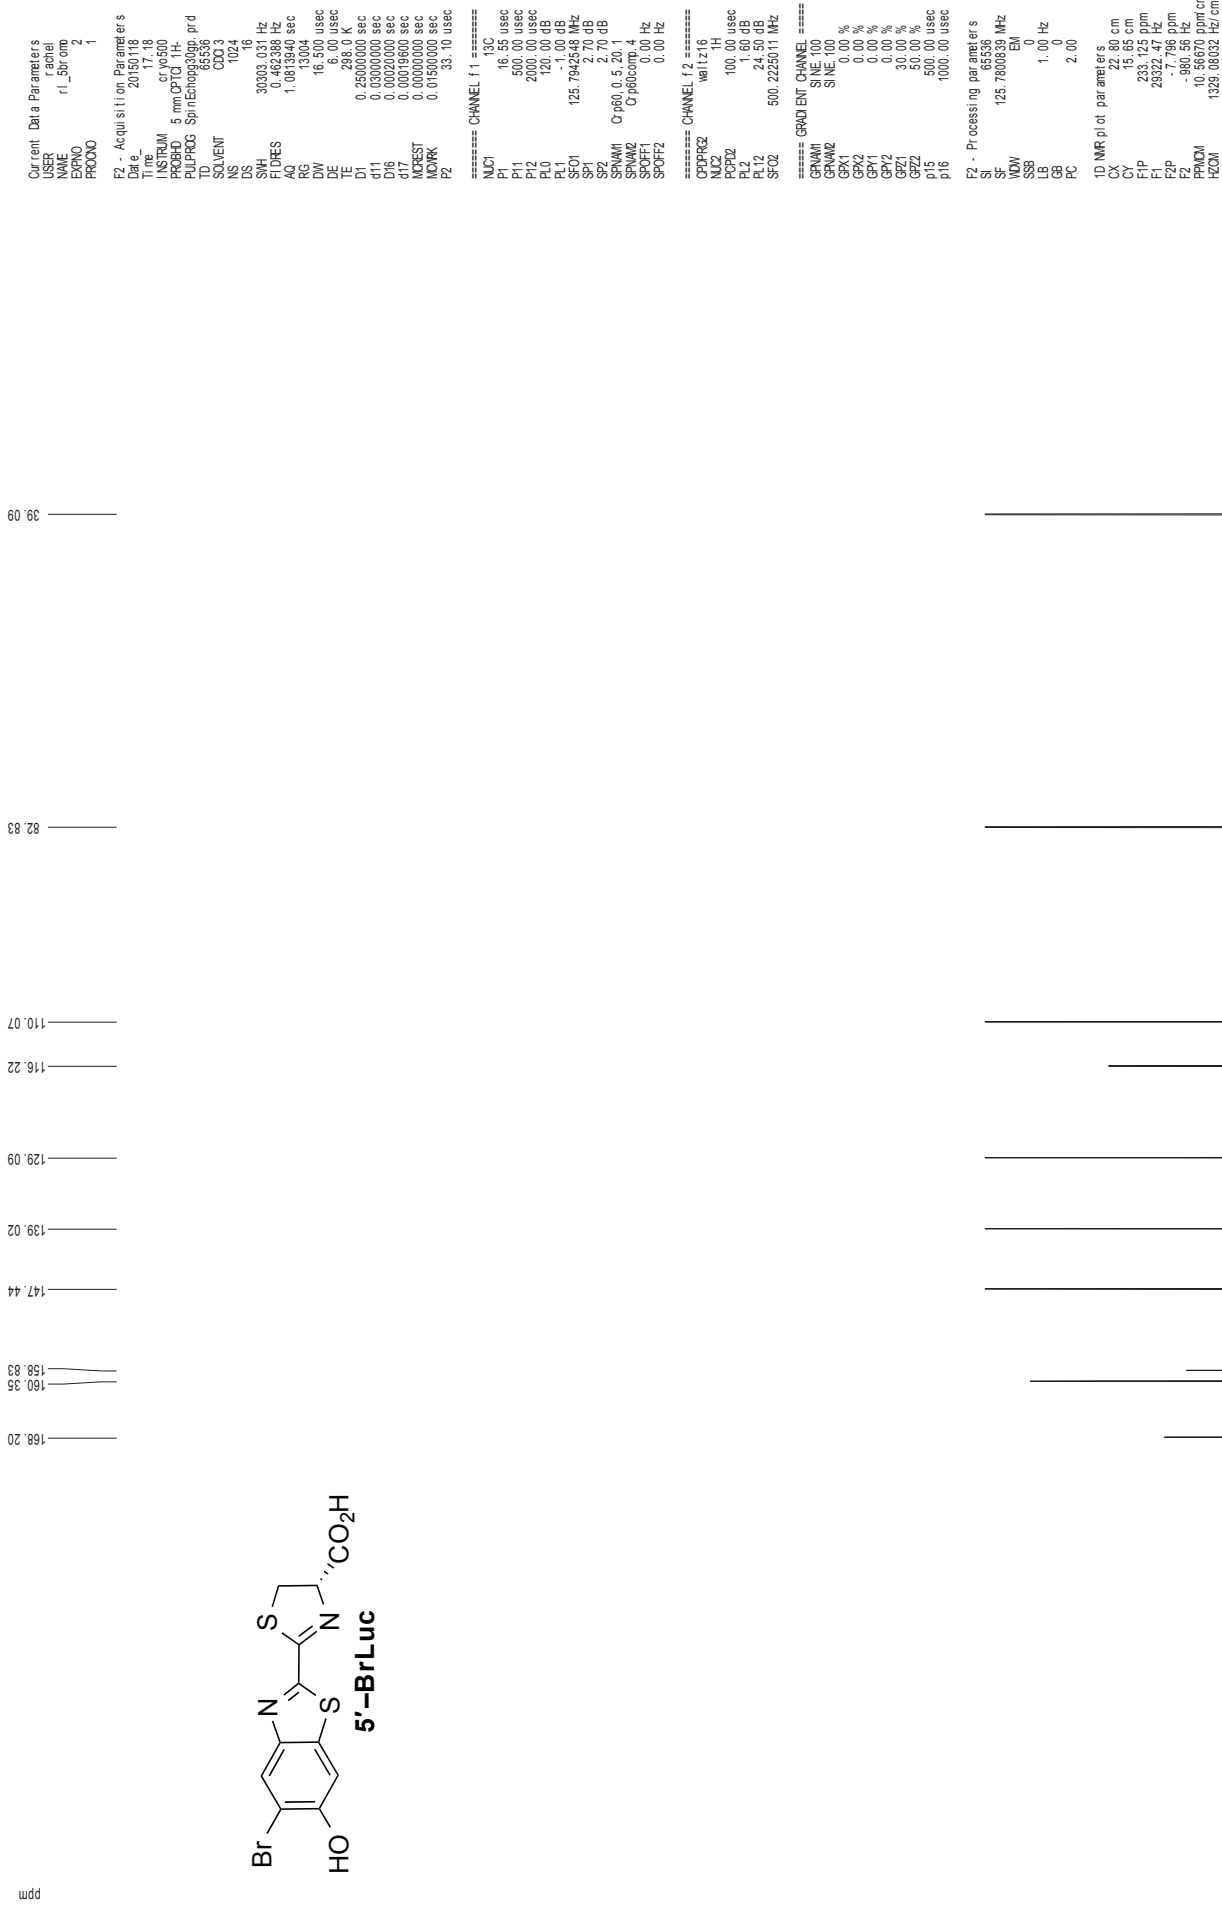



1H spectrum

ppm

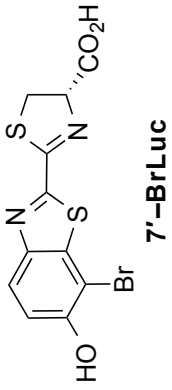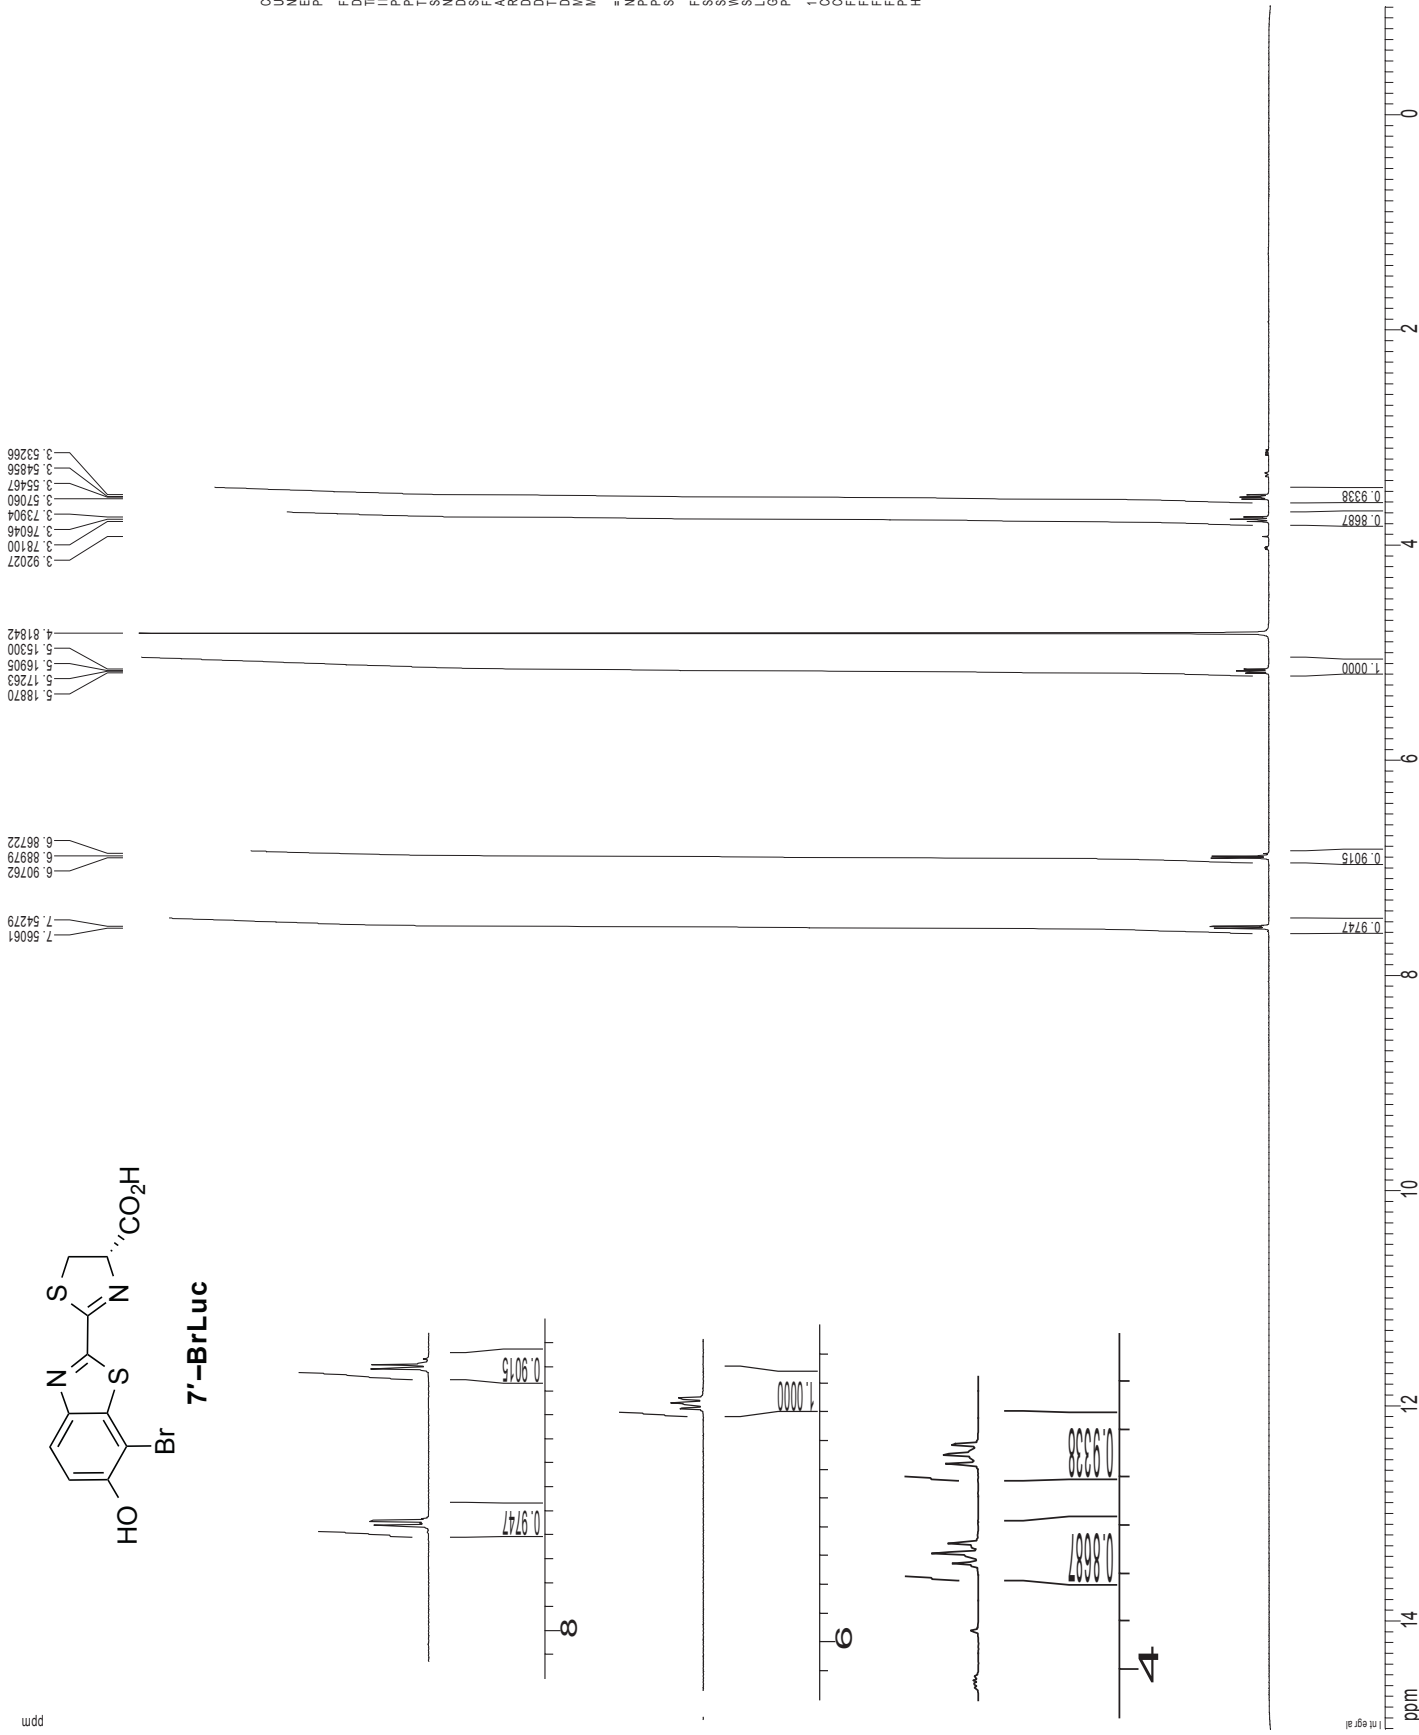

Current Data Parameters  
 USER rachel  
 NAME r17brnmluc1eri\_n\_cryo  
 EXPNO 1  
 PROCNO 1  
 F2 - Acquisition Parameters  
 Date\_ 20141117  
 Time 19:01  
 SYSTEM spect  
 PROBHD 5 mm CPTG-1H  
 PULPROG zg30  
 TD 81728  
 SOLVENT D2O  
 NS 2  
 DS 2  
 SWH 8012.820 Hz  
 FIDRES 0.098043 Hz  
 AQ 5.098774 sec  
 RG 172  
 EQ 62.00 usec  
 DE 6.00 usec  
 TE 288.0 K  
 DI 0.1000000 sec  
 ACQST 0.0000000 sec  
 ACQPR 0.0150000 sec  
 ===== CHANNEL f1 =====  
 NUC1 1H  
 P1 7.50 usec  
 PL 0.00 dB  
 SFO1 500.223505 MHz  
 F2 - Processing parameters  
 SI 655.36  
 MD 500.2200000 MHz  
 EQ 0  
 SSB 0  
 LB 0.30 Hz  
 GB 0  
 PC 4.00  
 1D NMR plot parameters  
 CX 22.80 cm  
 CY 15.00 cm  
 FIP 15.009 ppm  
 F1 71.056 ppm  
 F2 -504.87 Hz  
 PRGM 0.710257 ppm/cm  
 HZCM 351.43951 Hz/cm

Z-restored spin-echo <sup>13</sup>C spectrum with <sup>1</sup>H decoupling

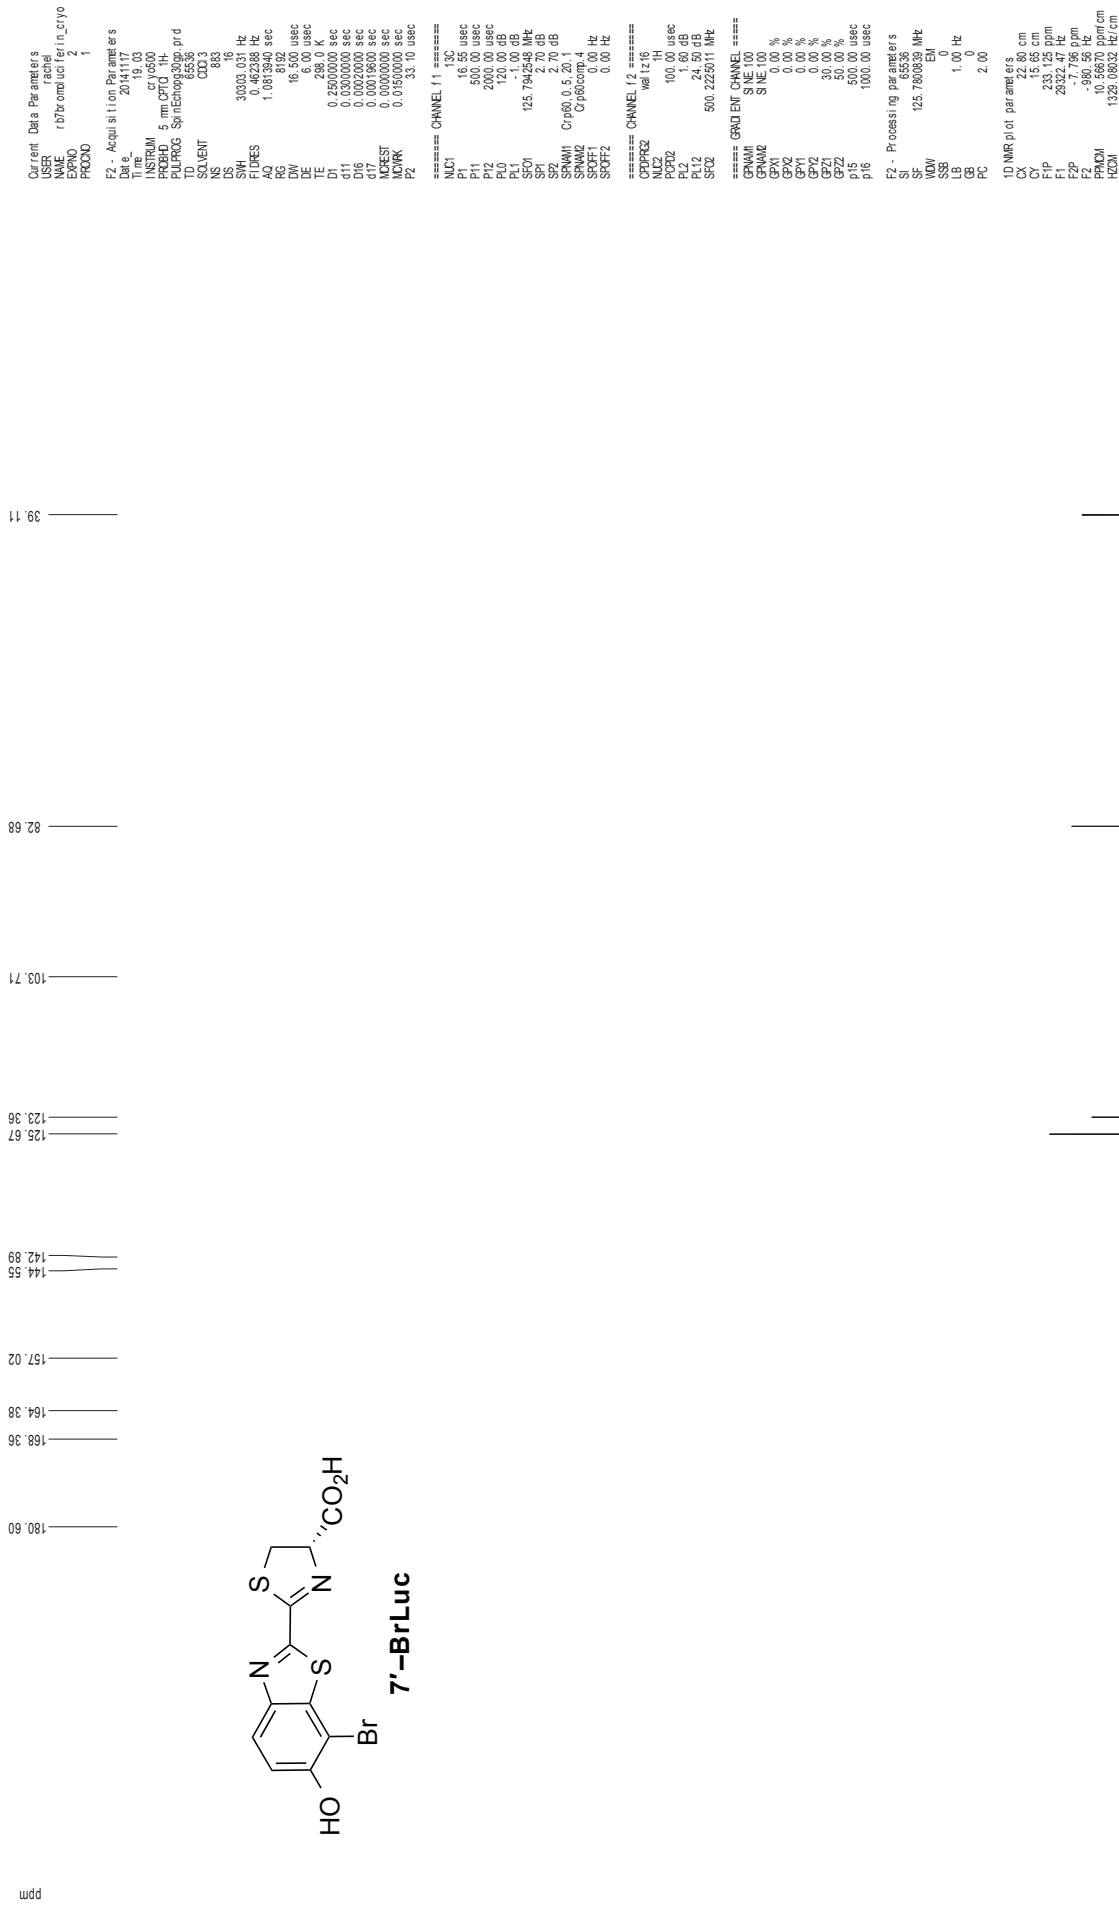

ppm

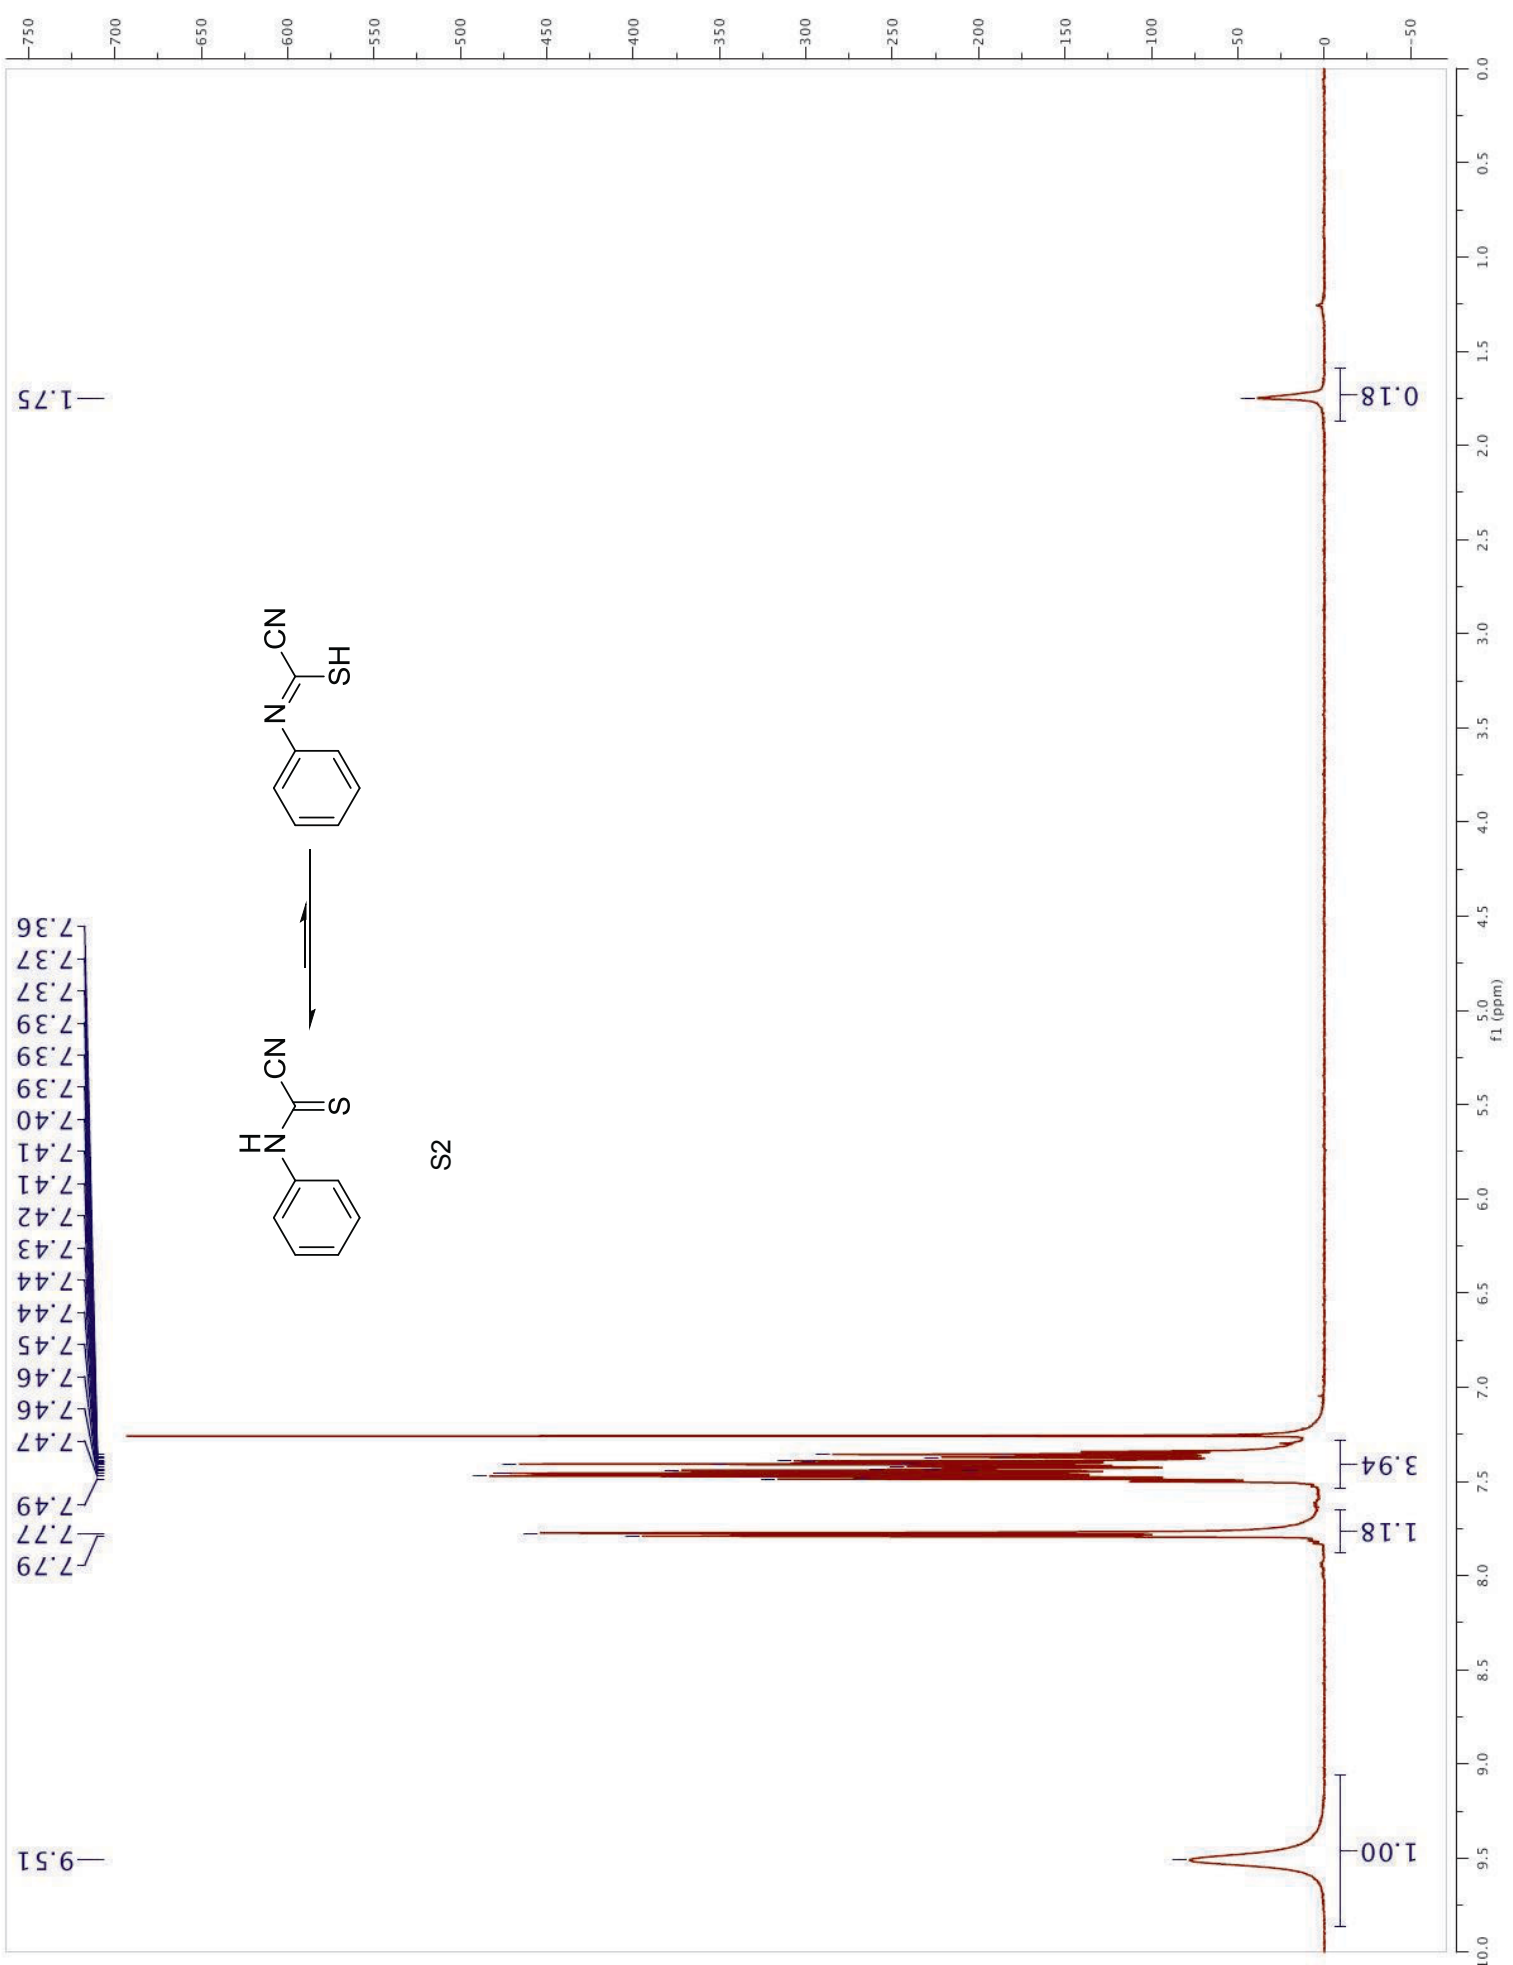

f1 (ppm)

0.18

3.94

1.18

1.00

-1.75

7.36  
7.37  
7.37  
7.39  
7.39  
7.39  
7.40  
7.41  
7.41  
7.42  
7.43  
7.44  
7.44  
7.44  
7.45  
7.46  
7.46  
7.47  
7.49  
7.77  
7.79

-9.51

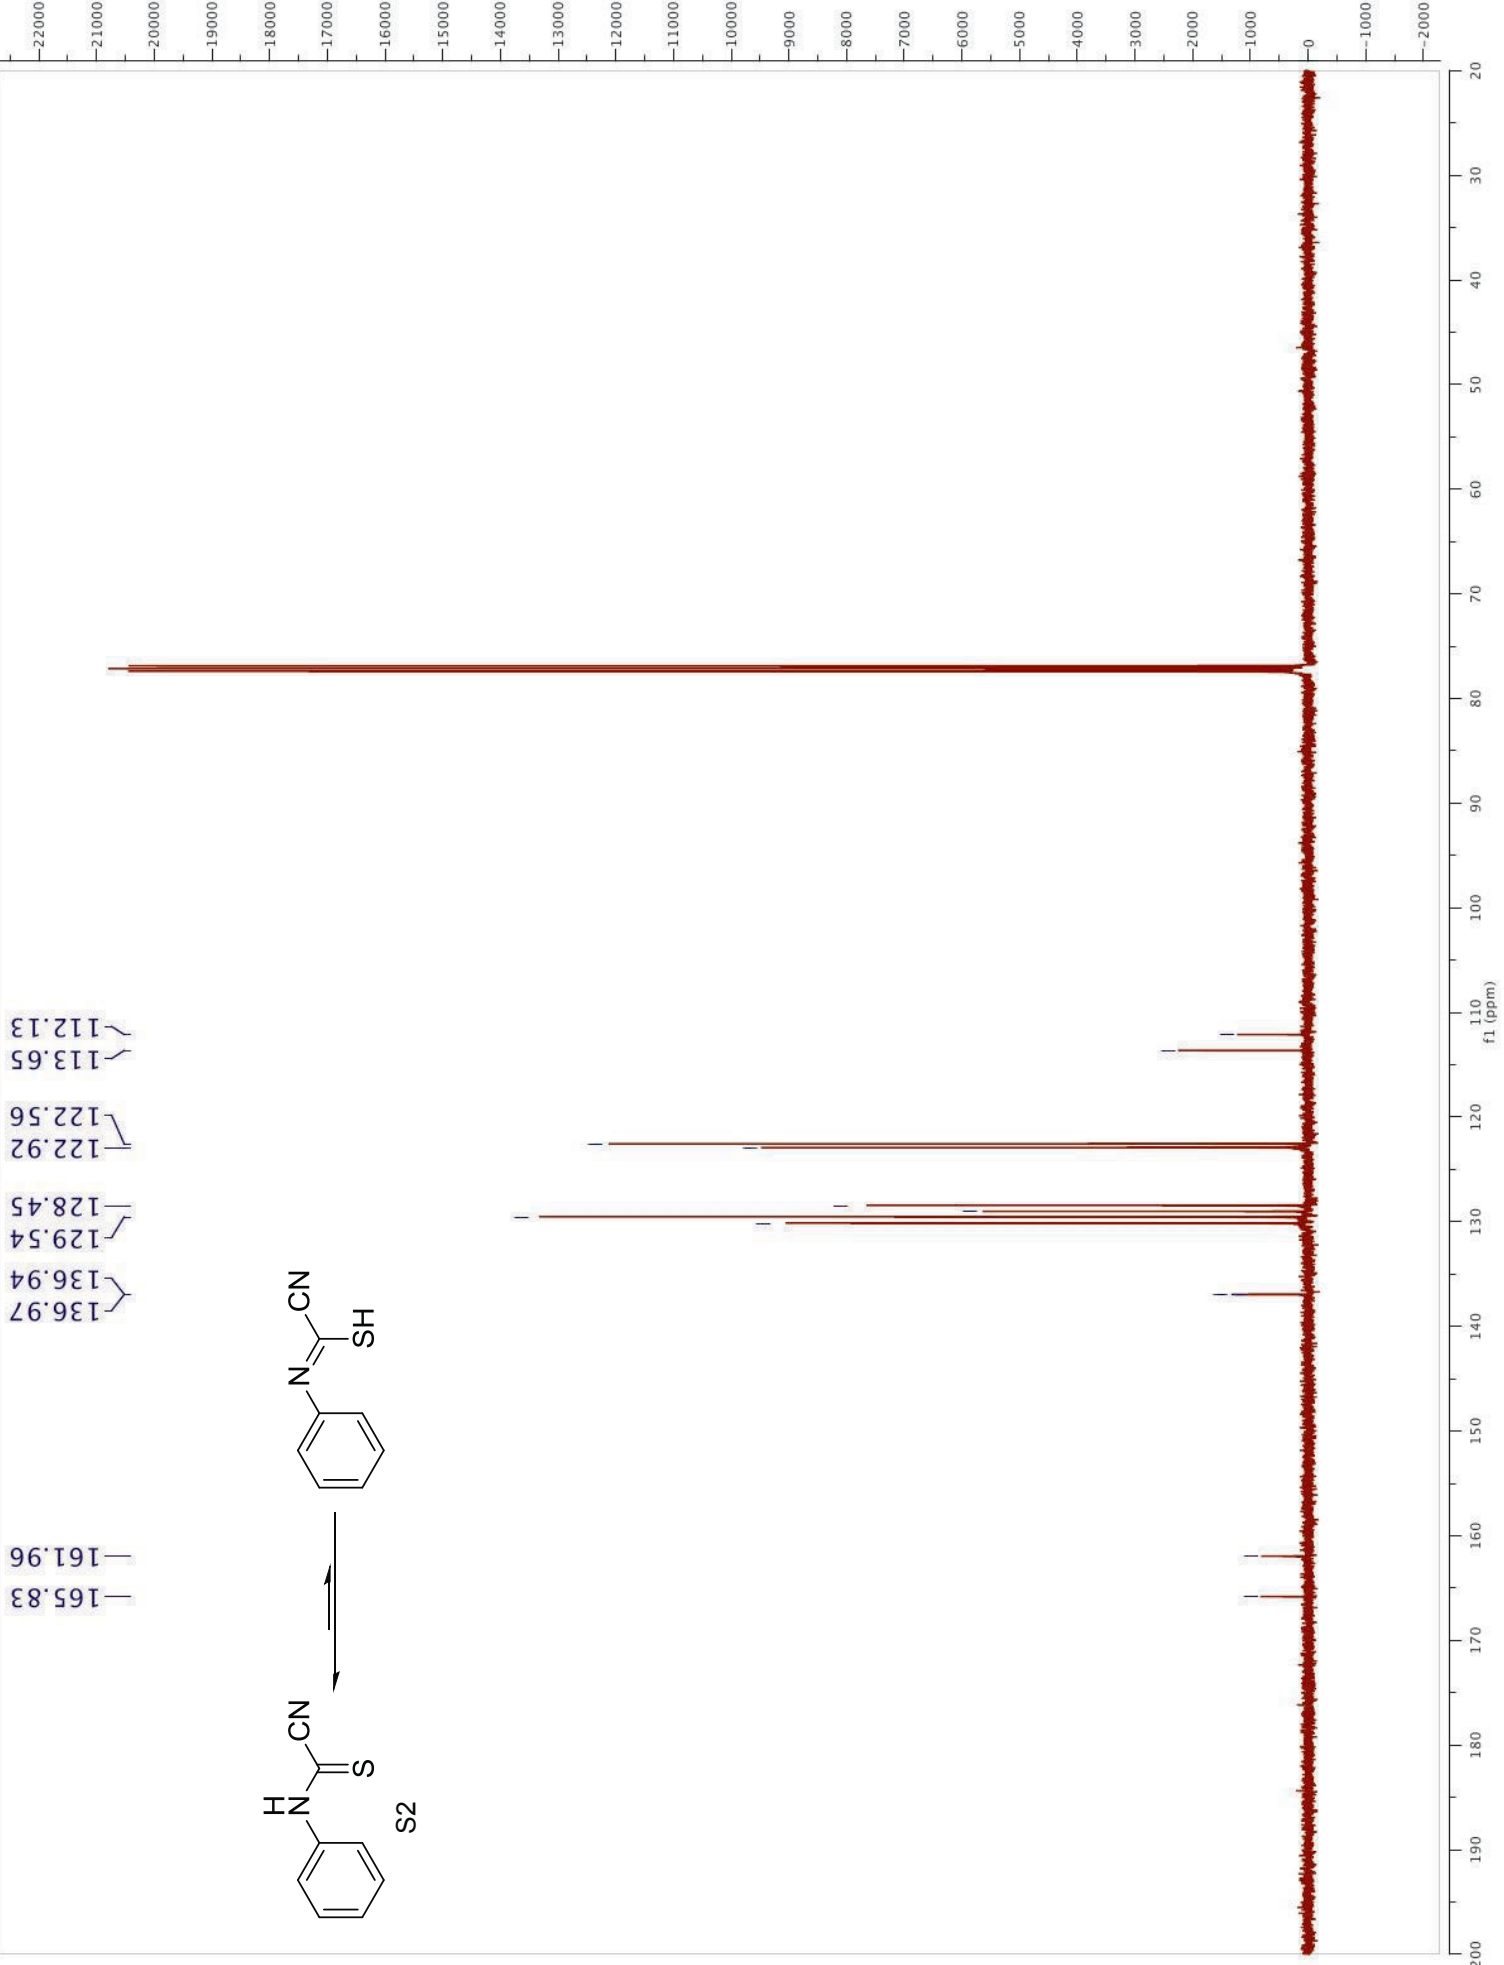

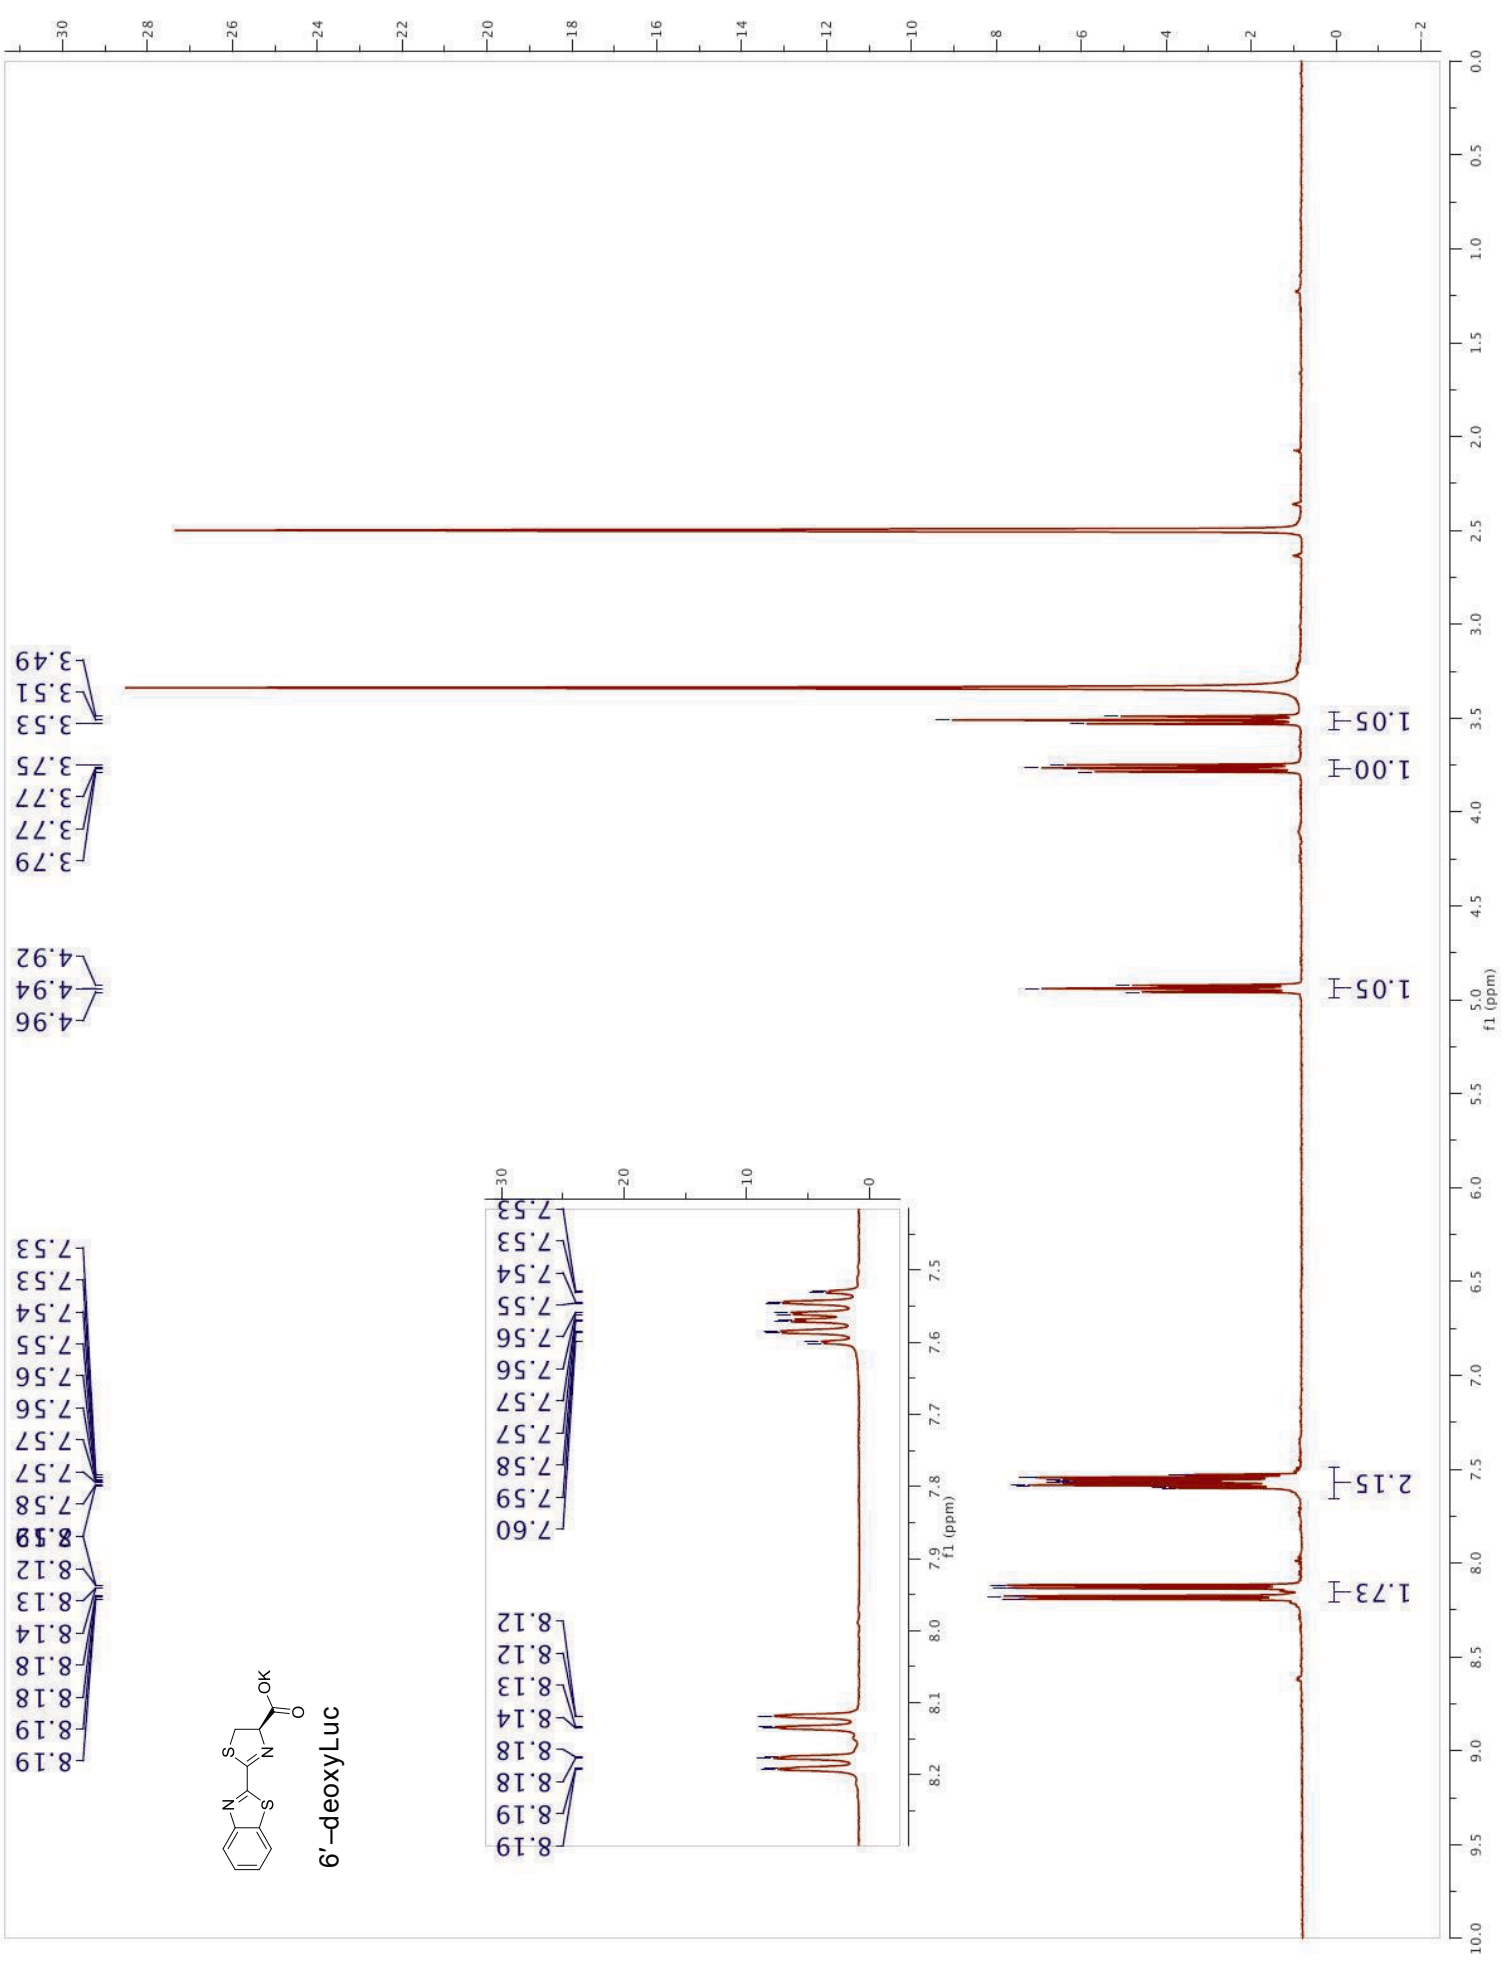

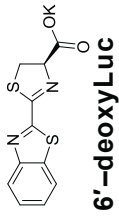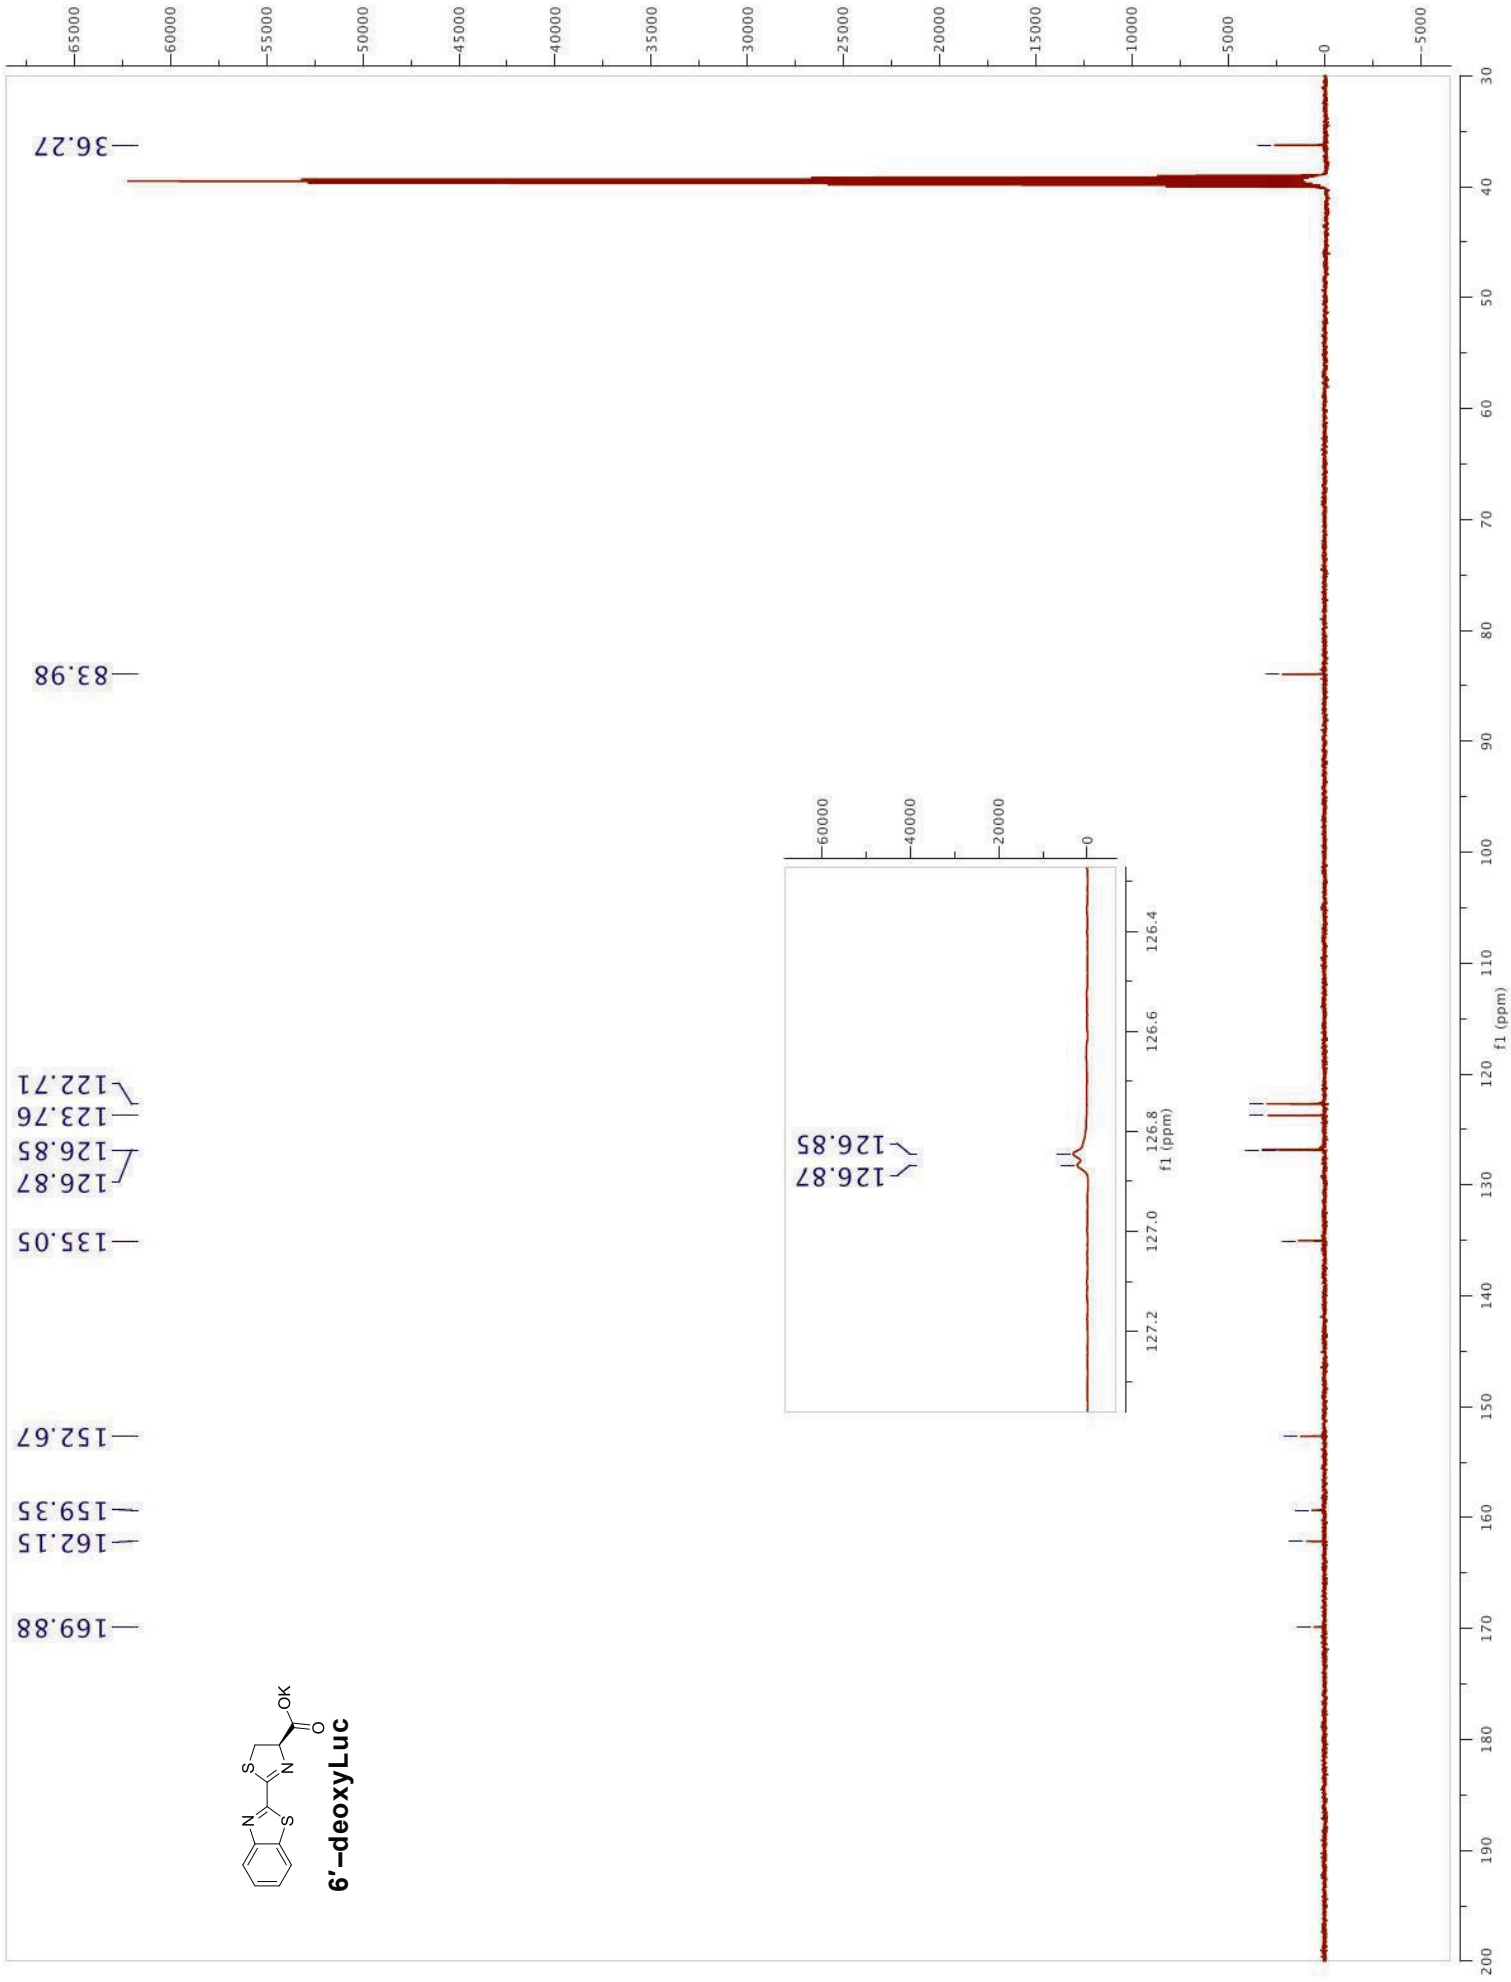

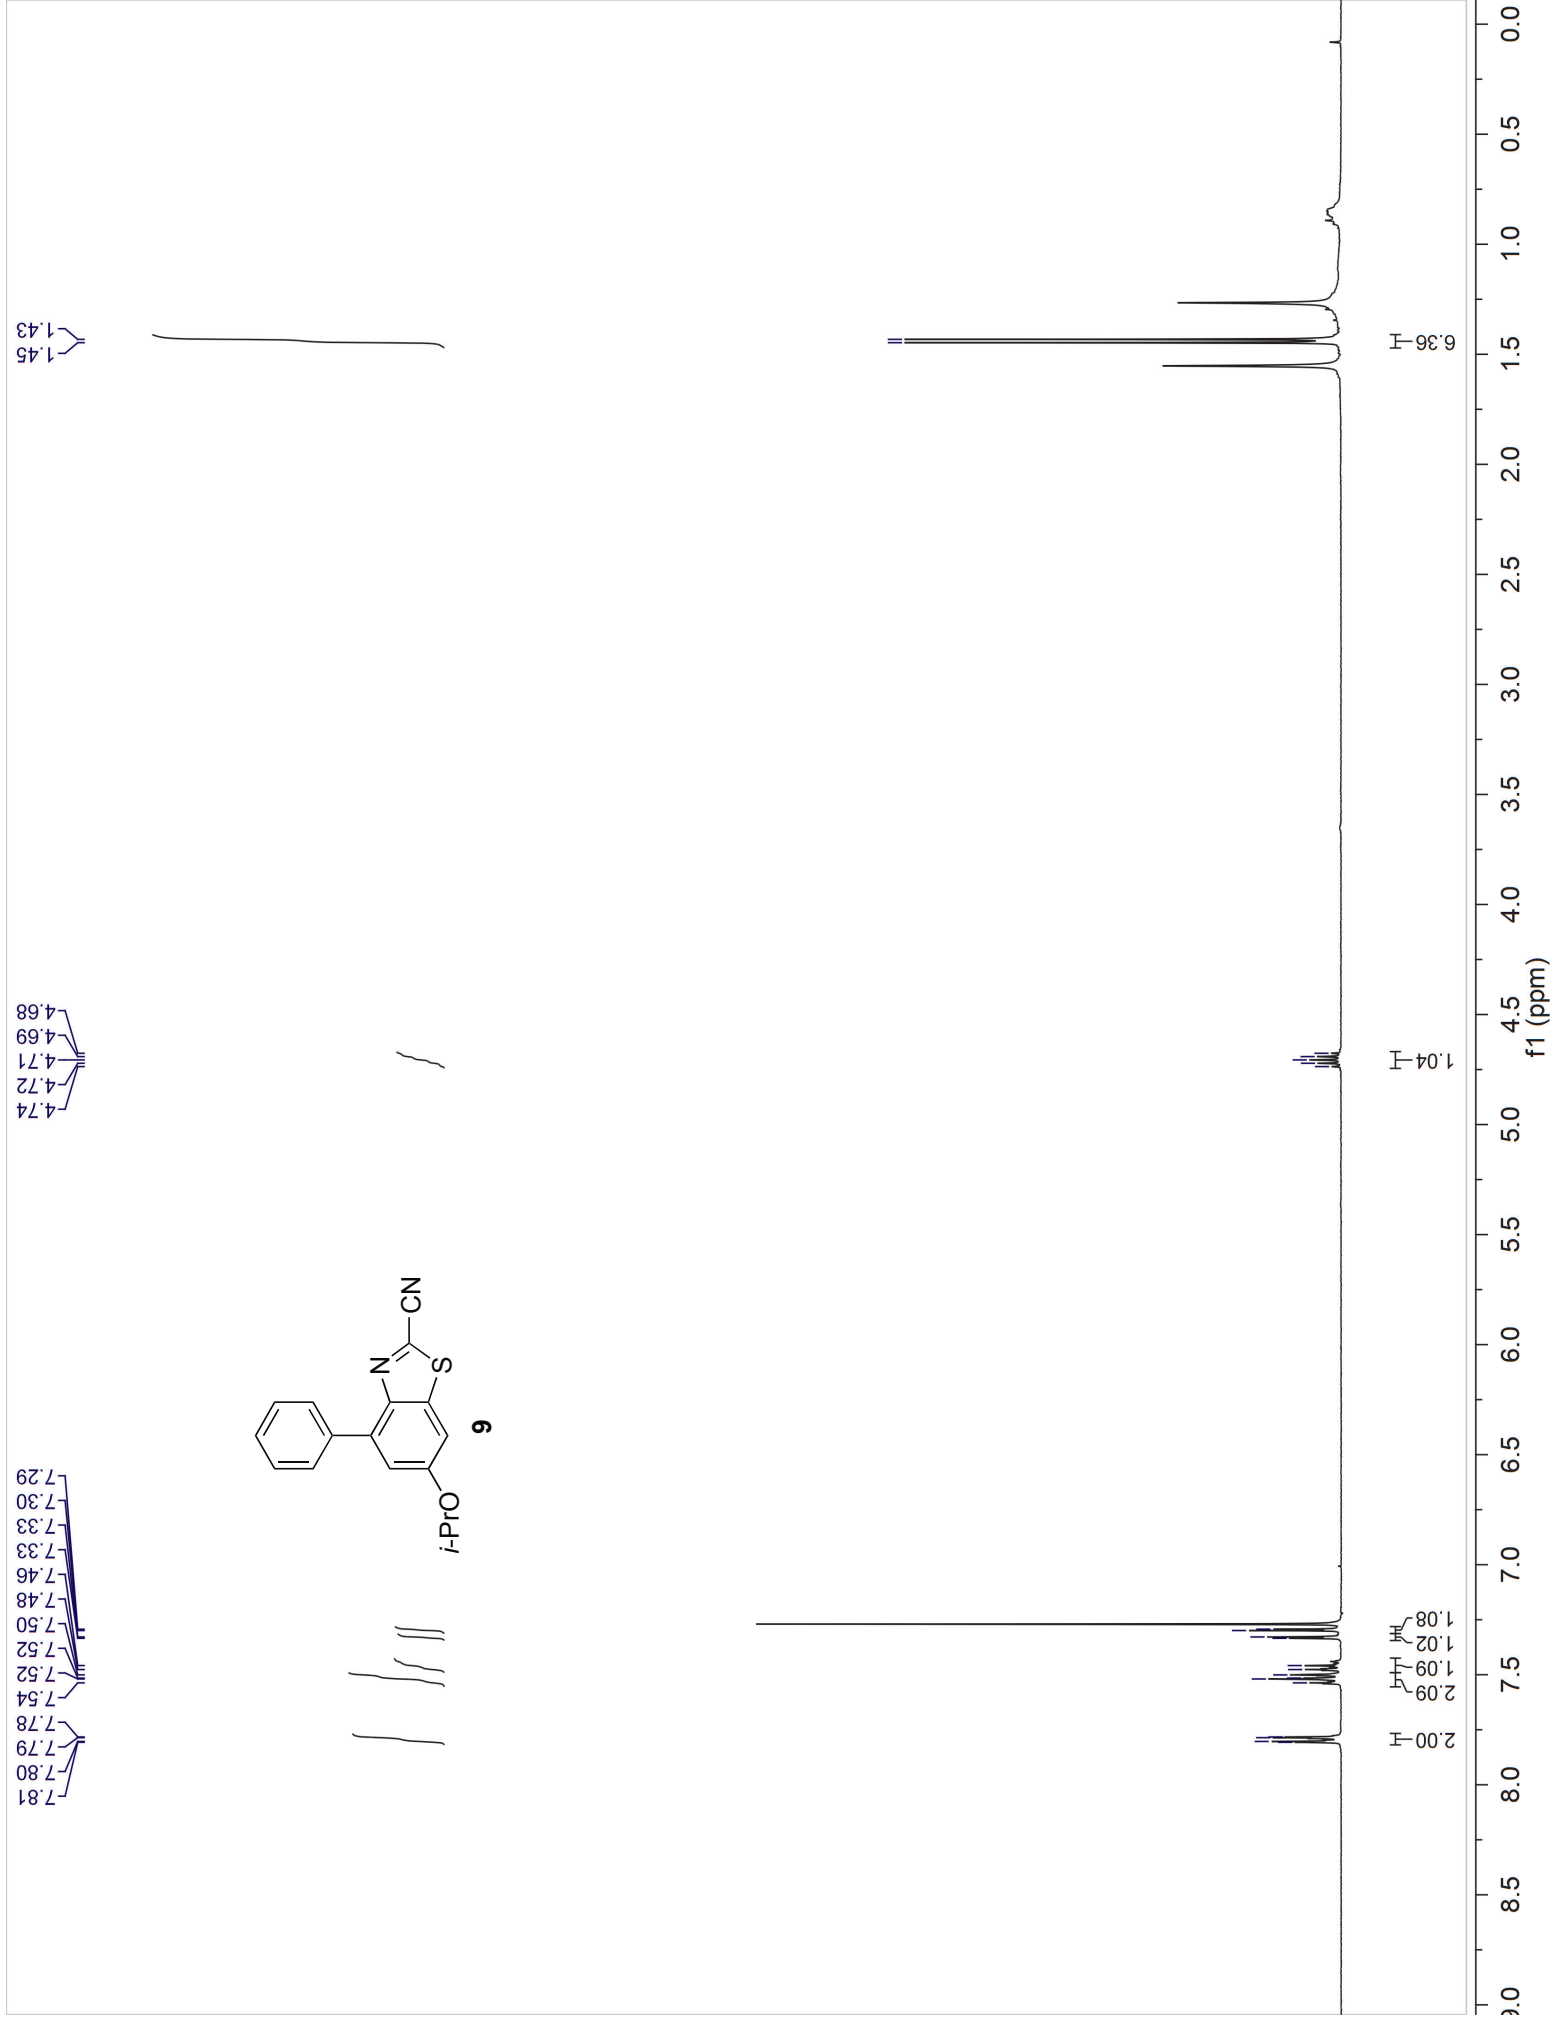

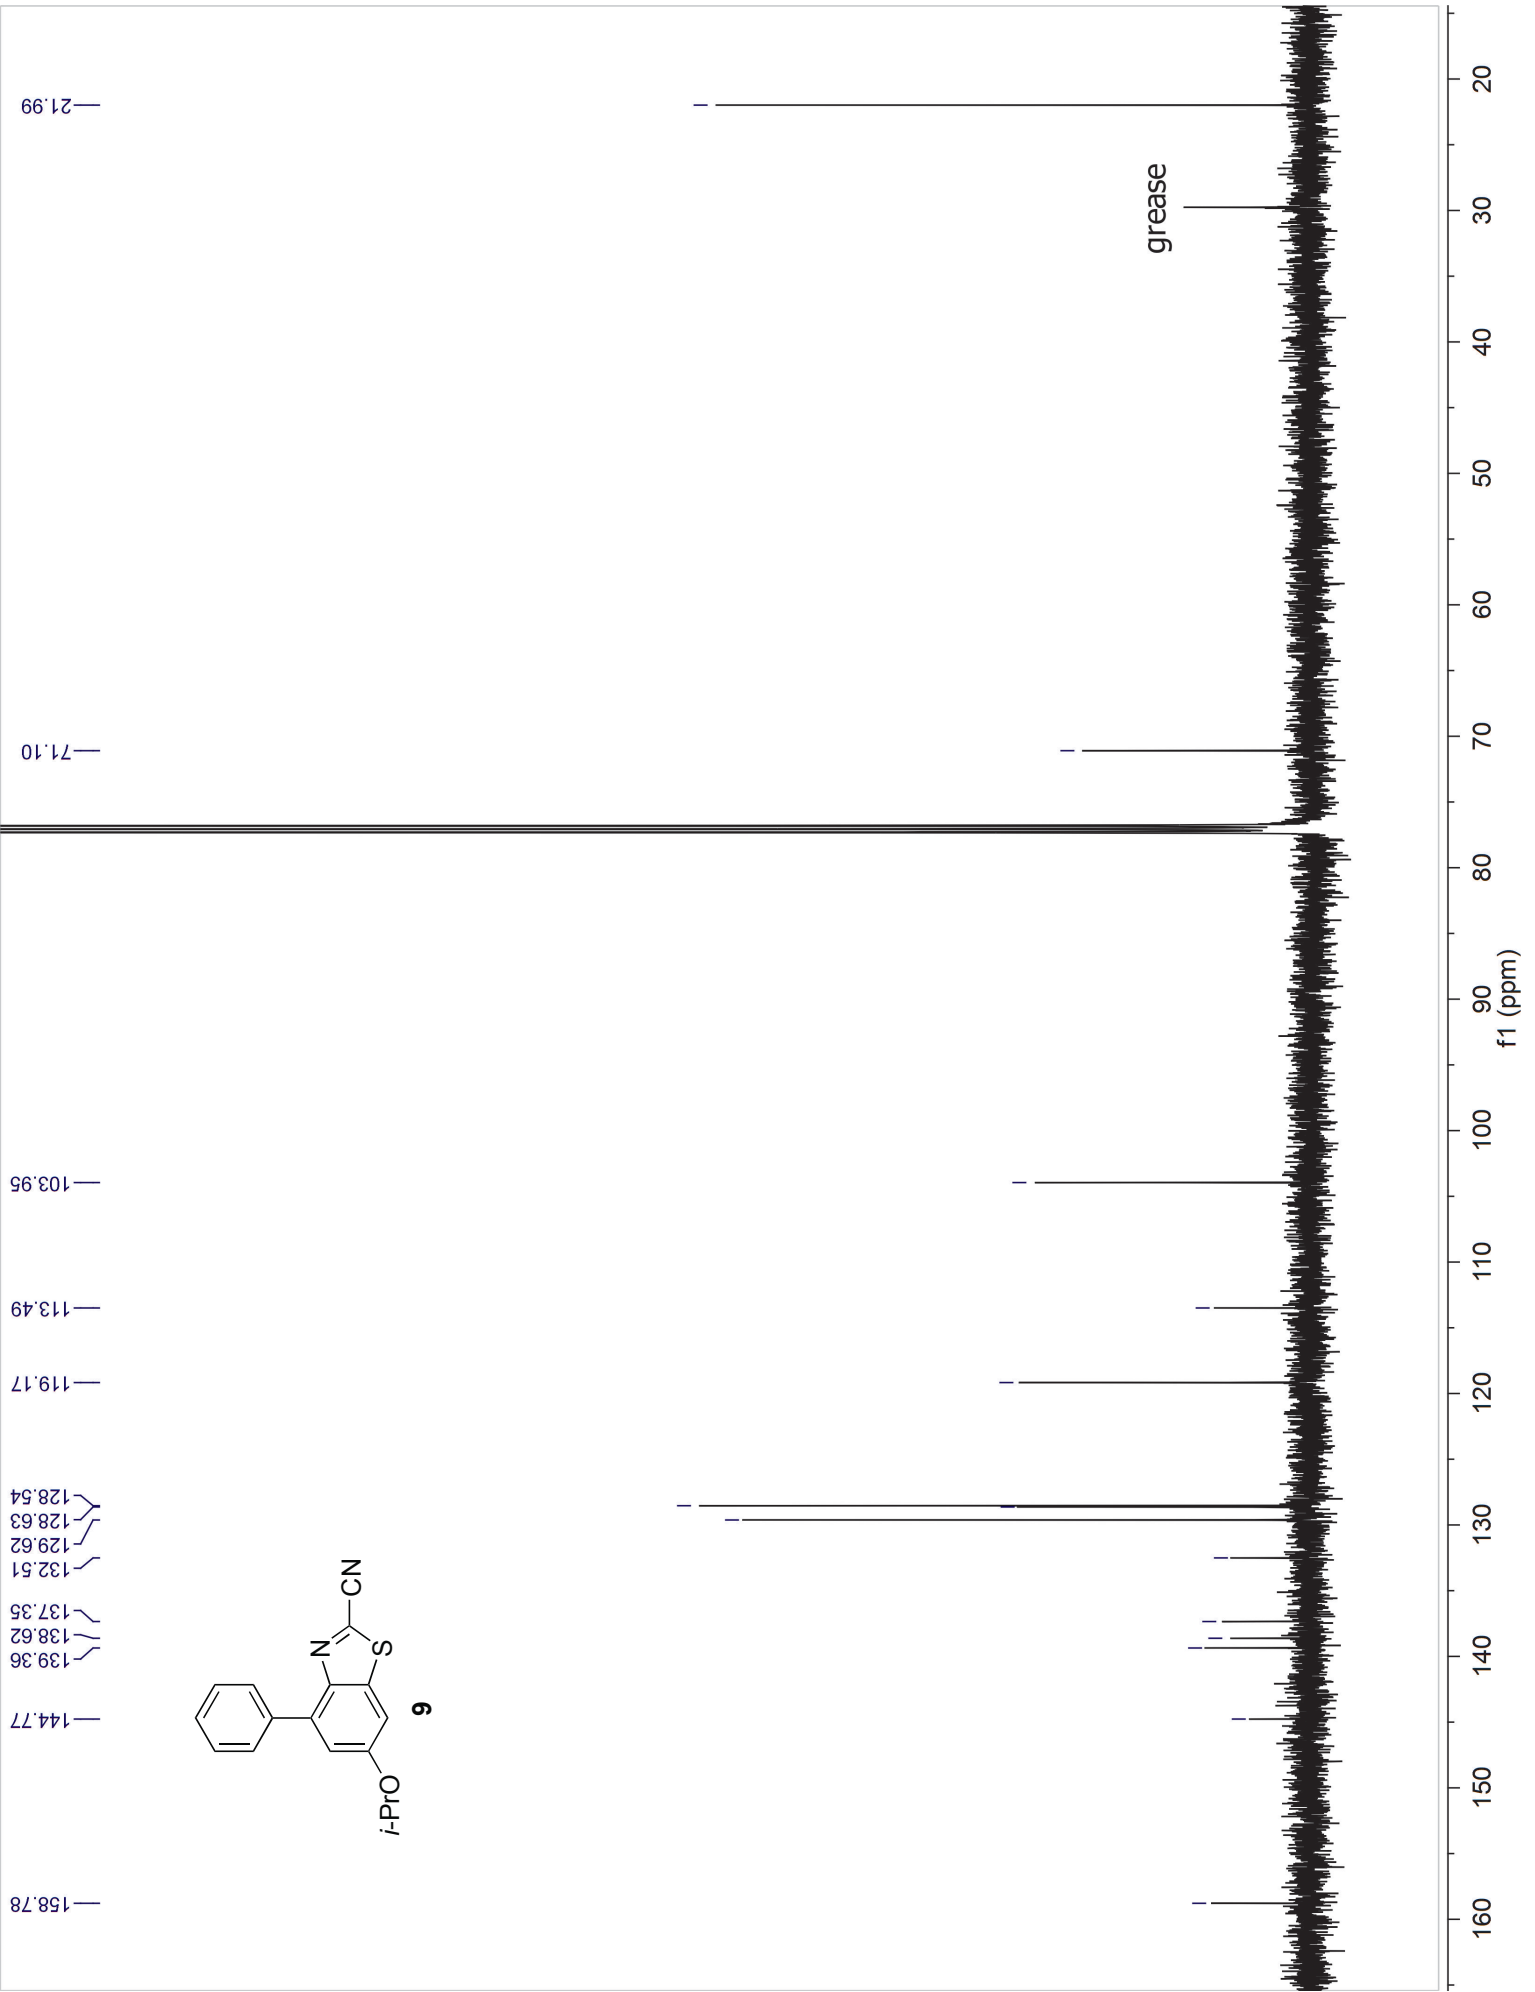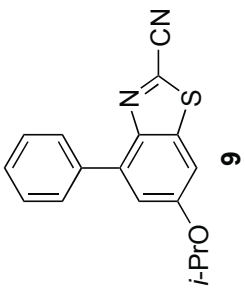



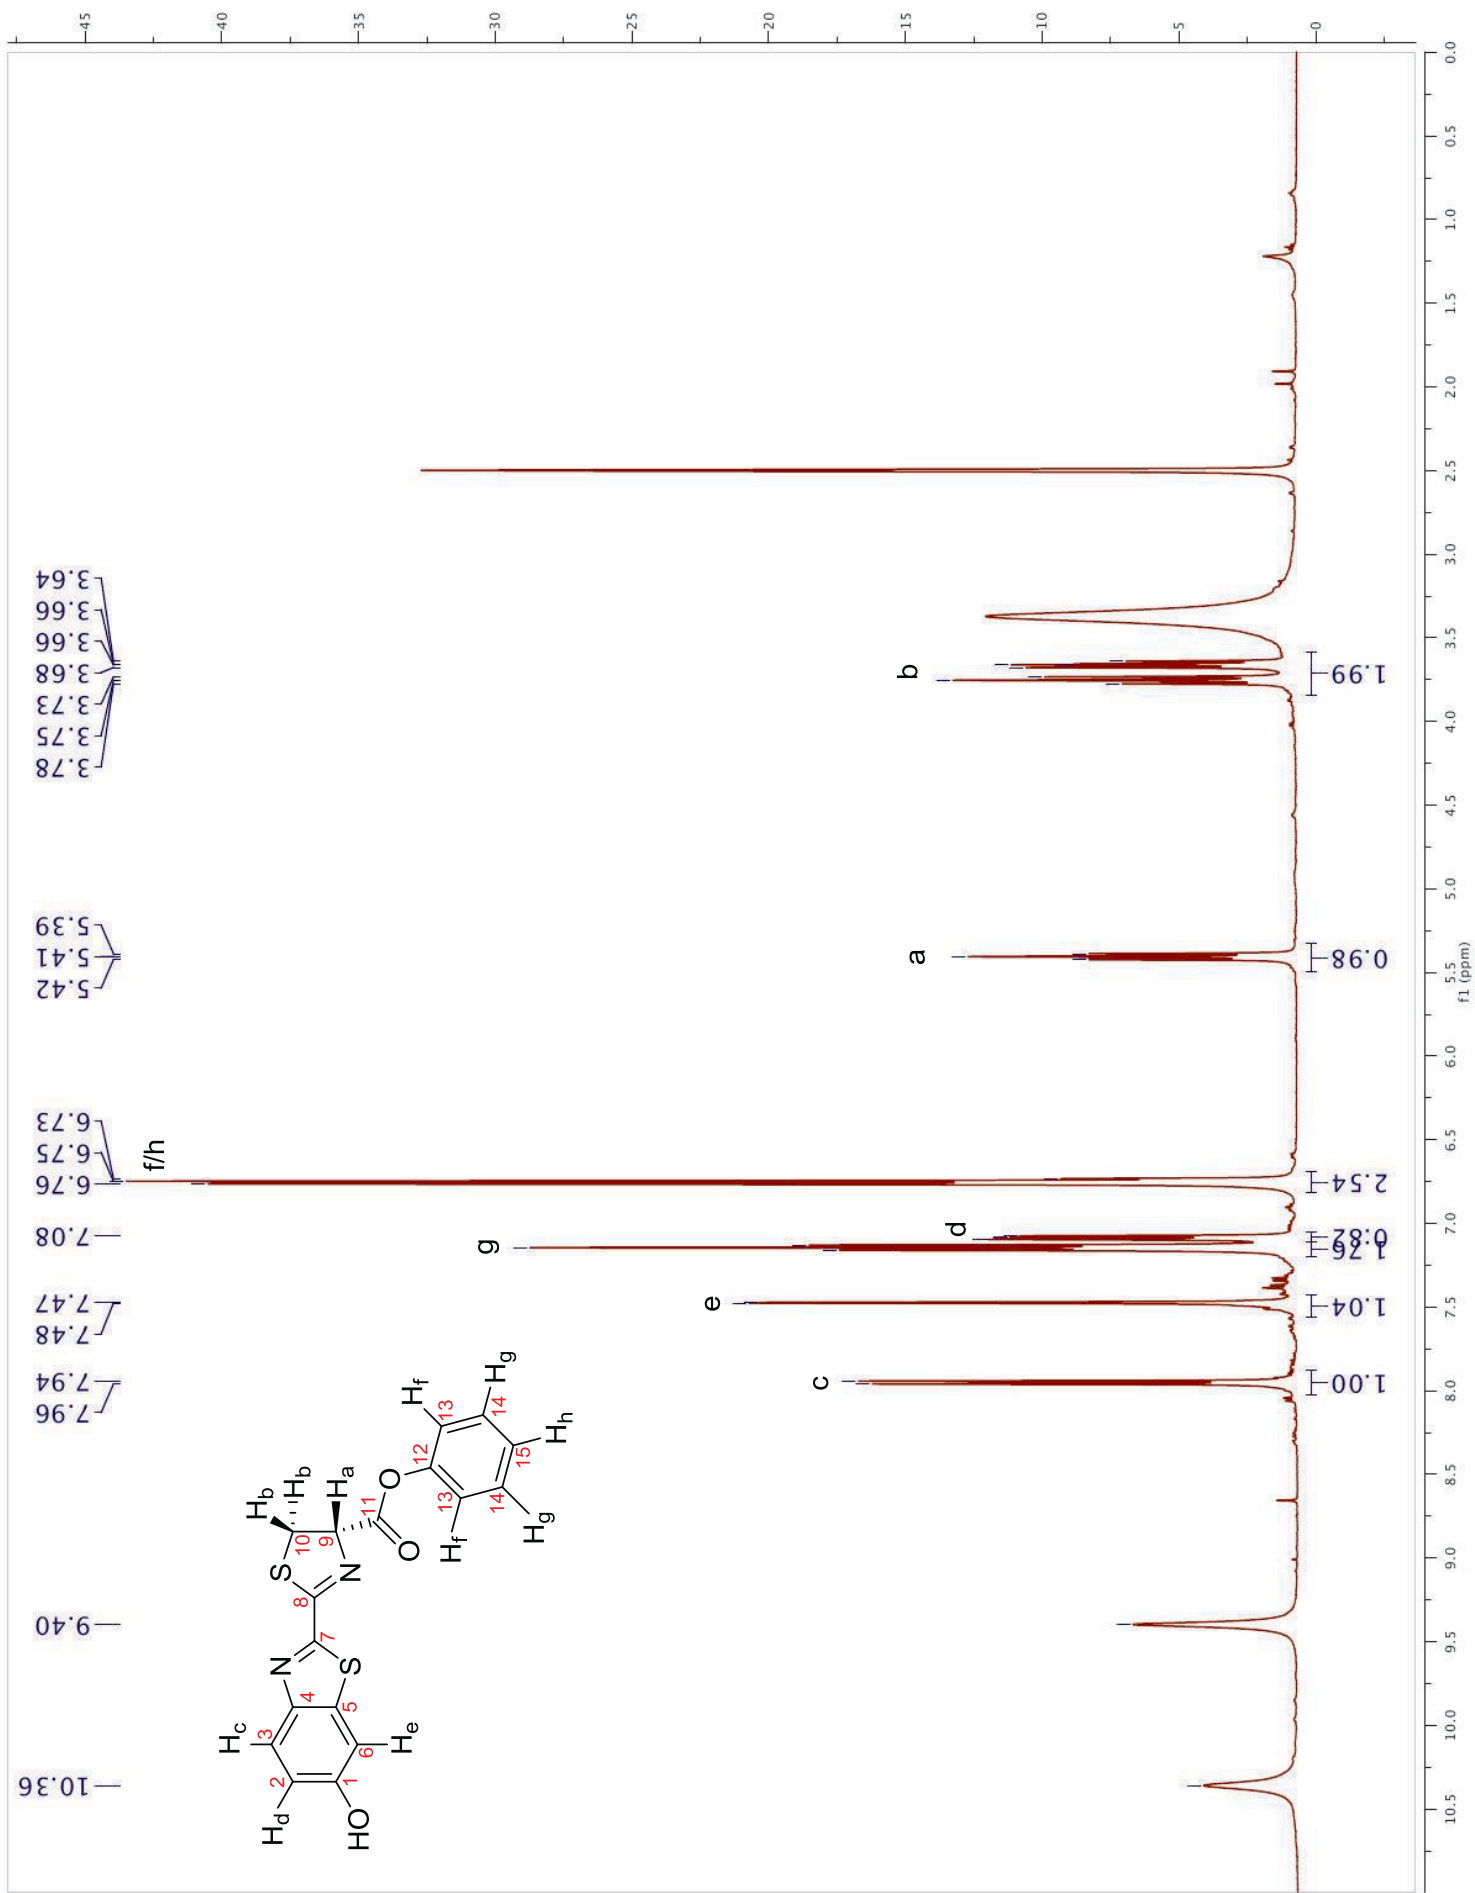

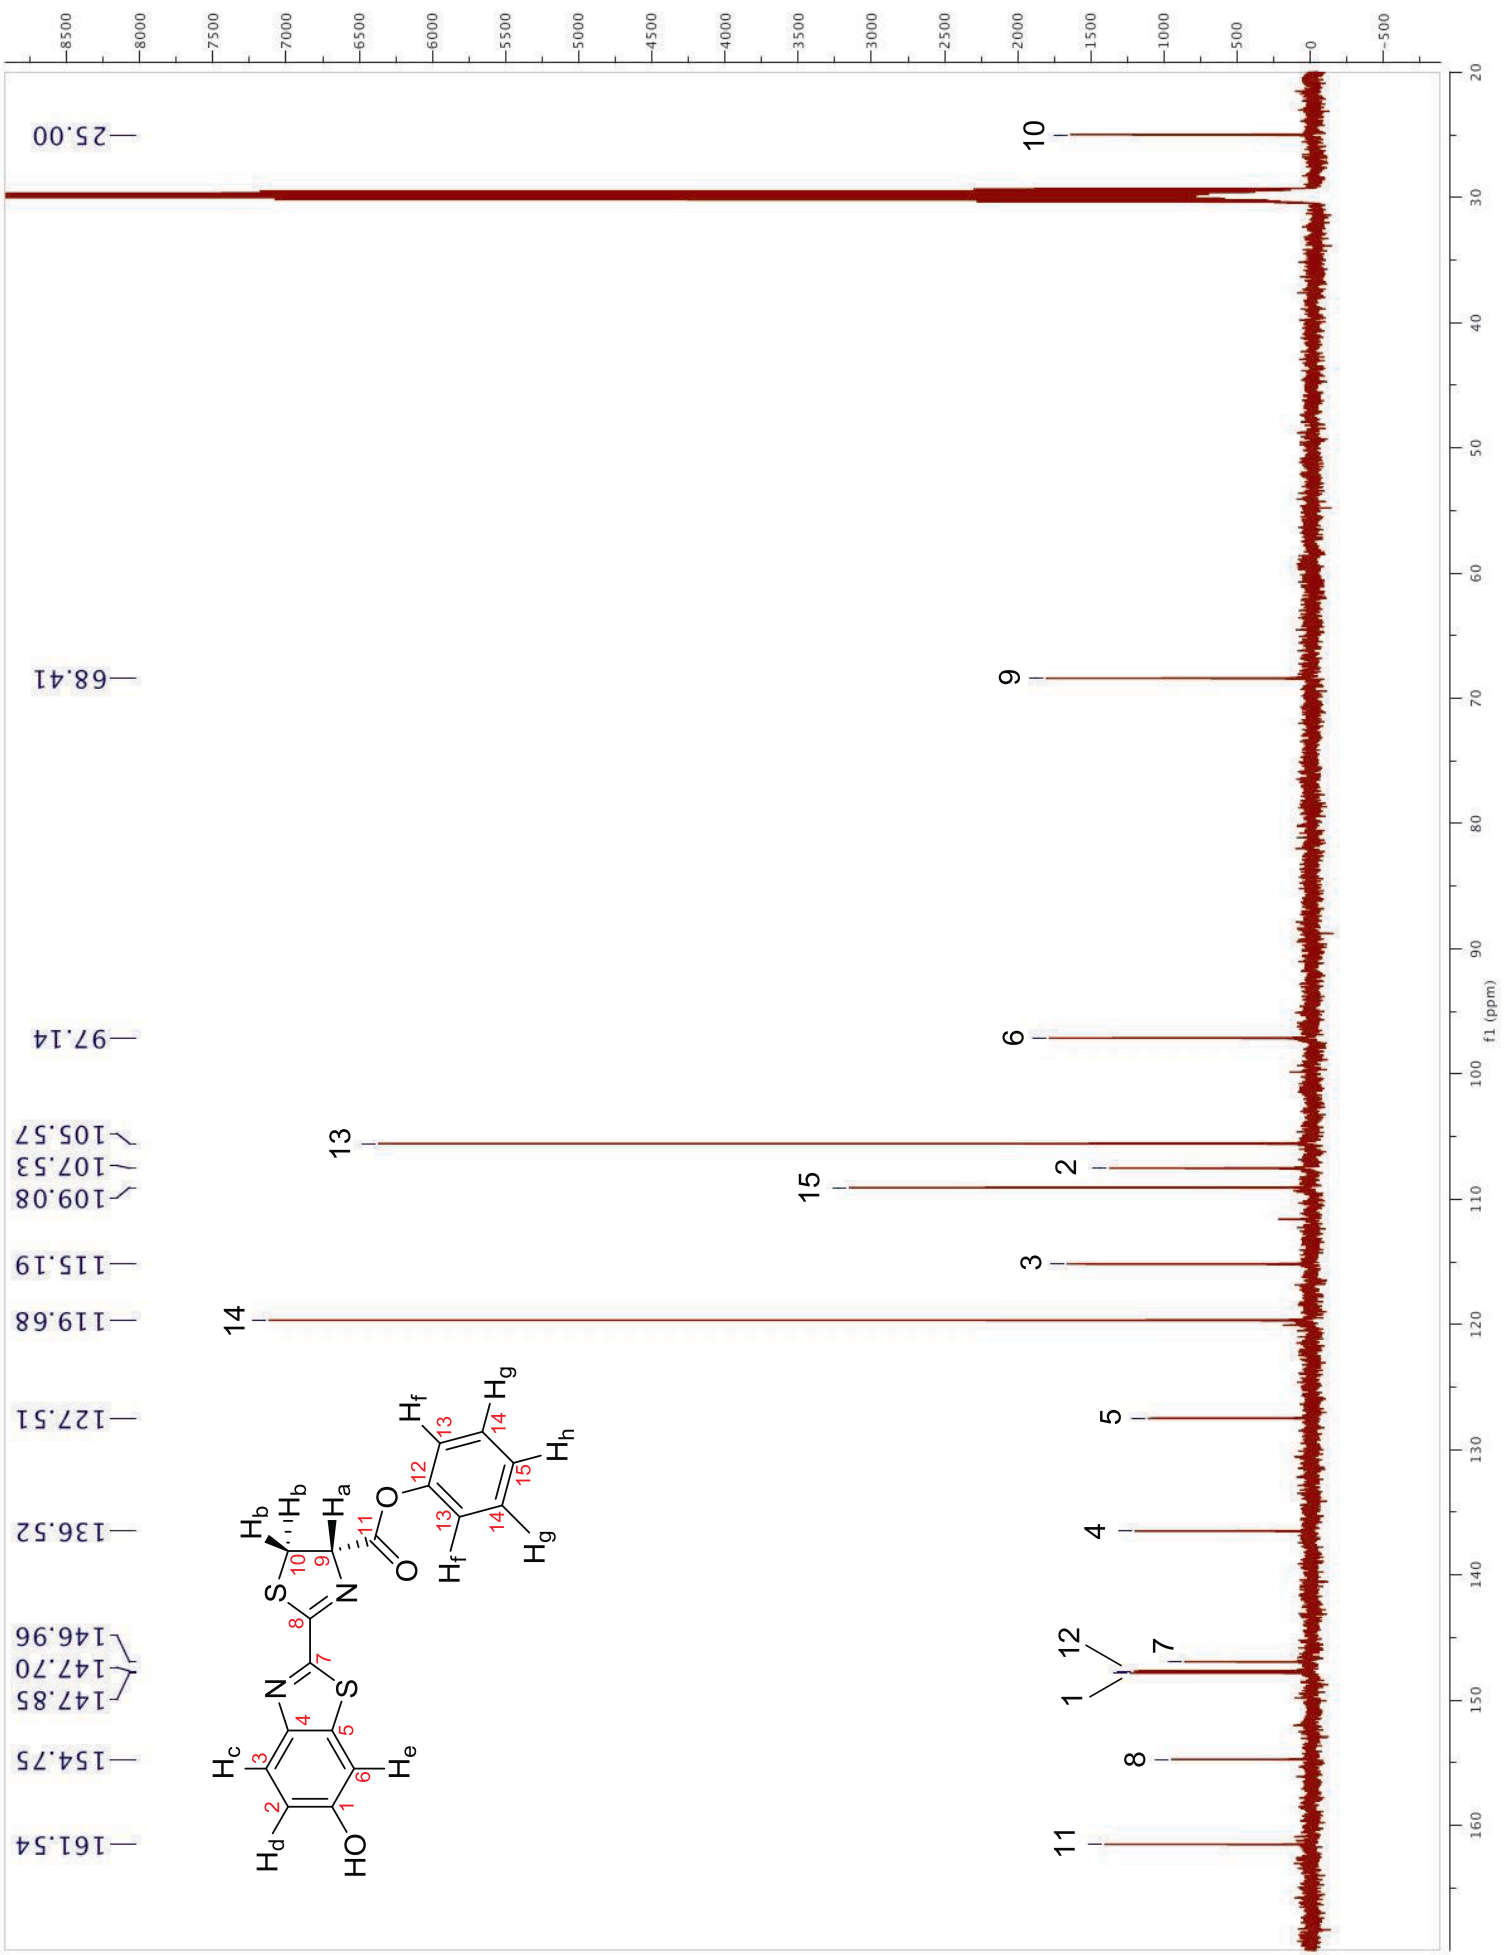

HSQC

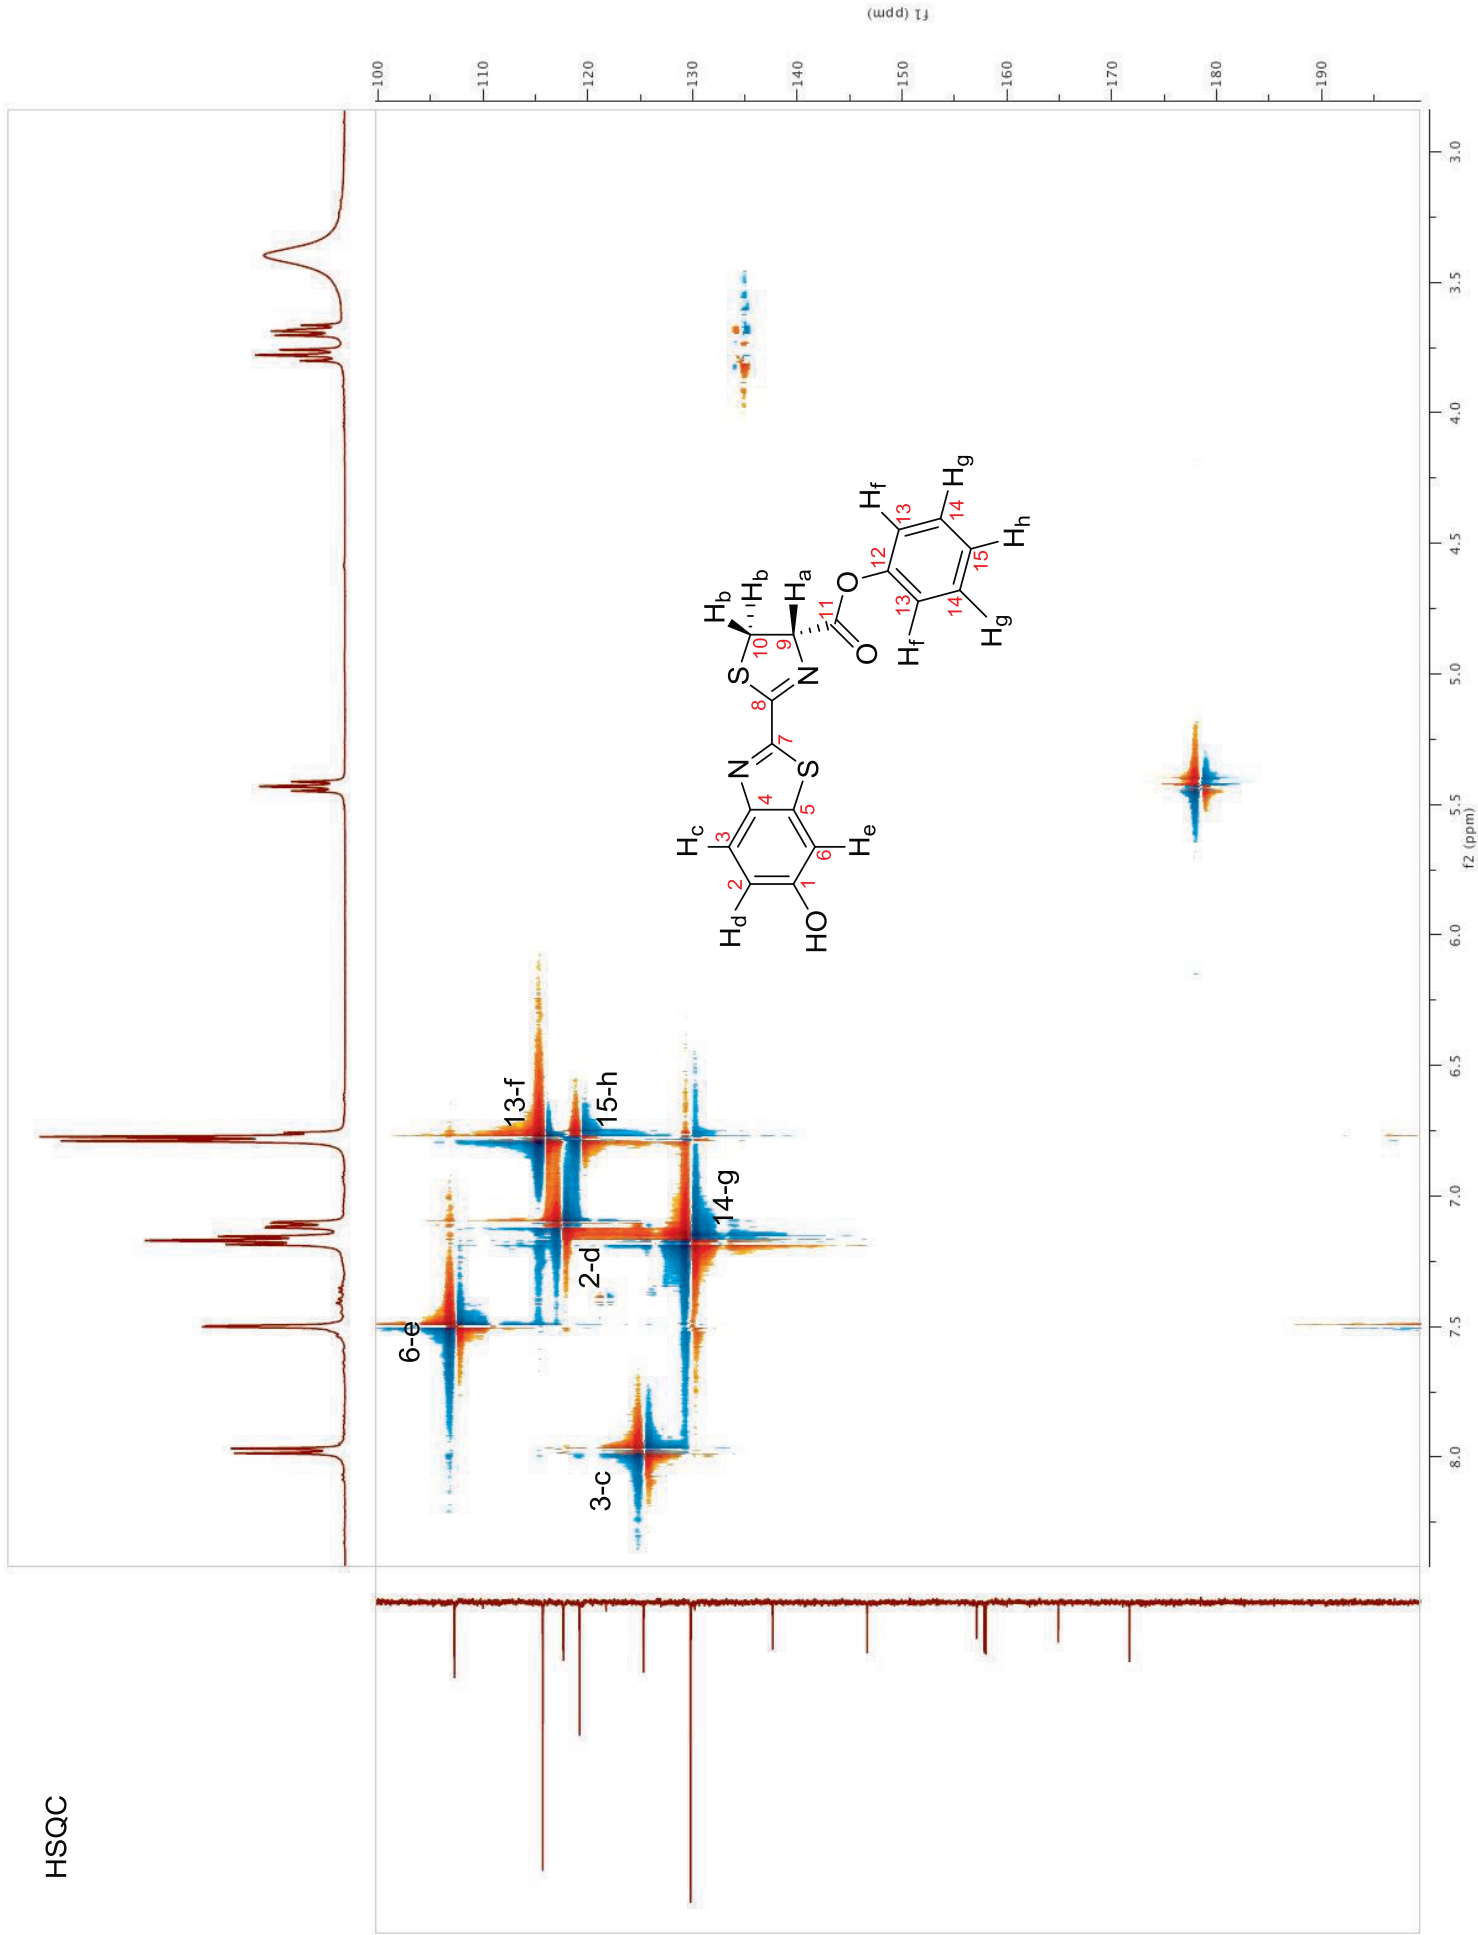

HMBC optimized for  
2 Hz coupling

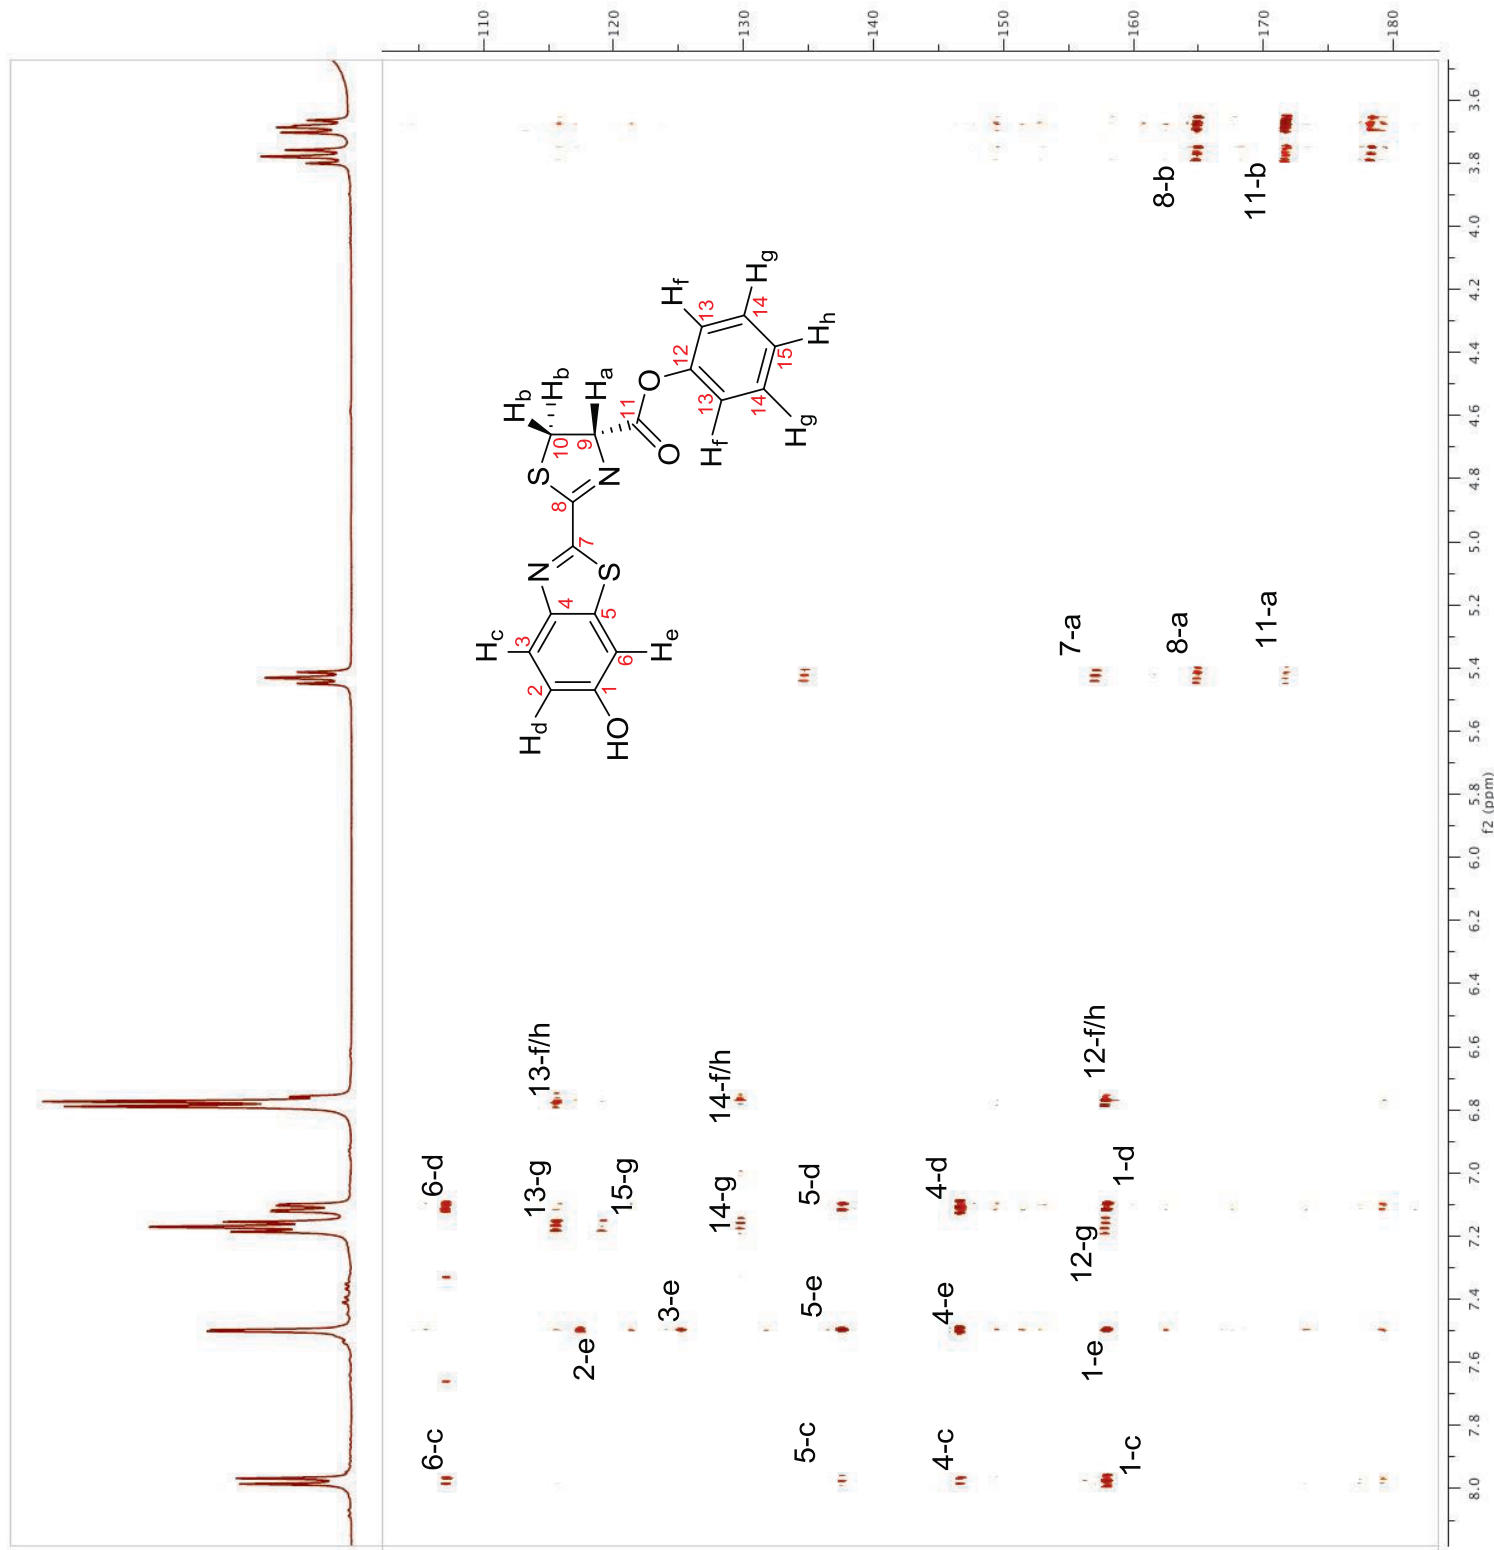

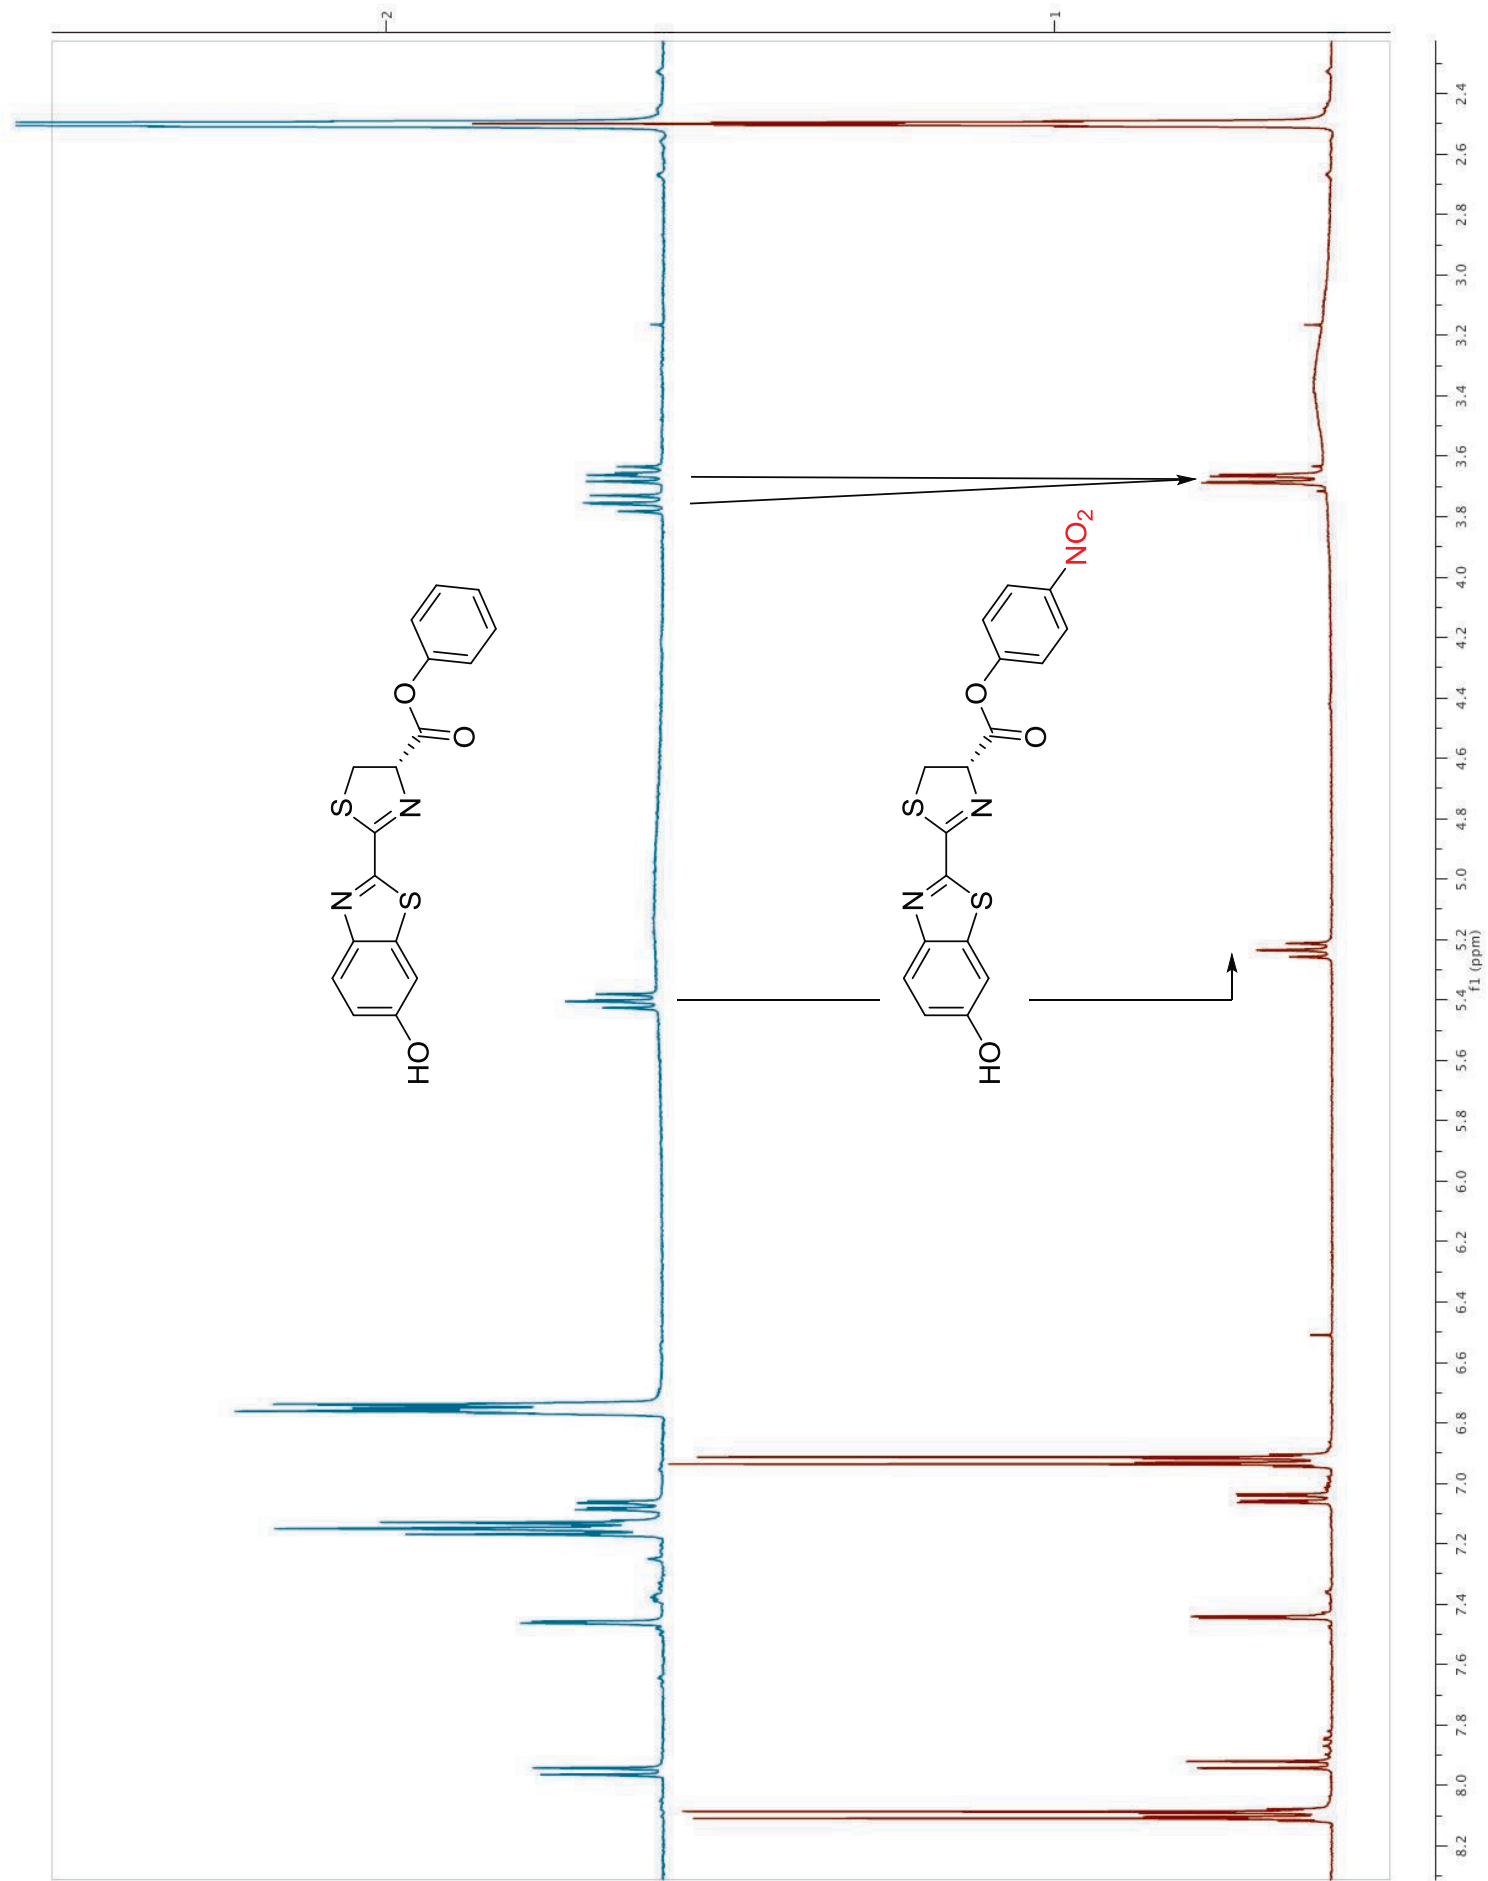

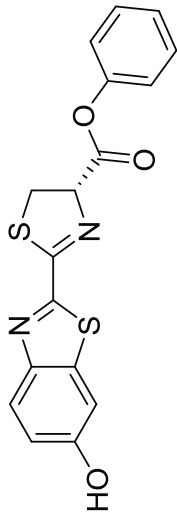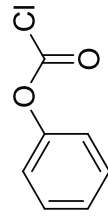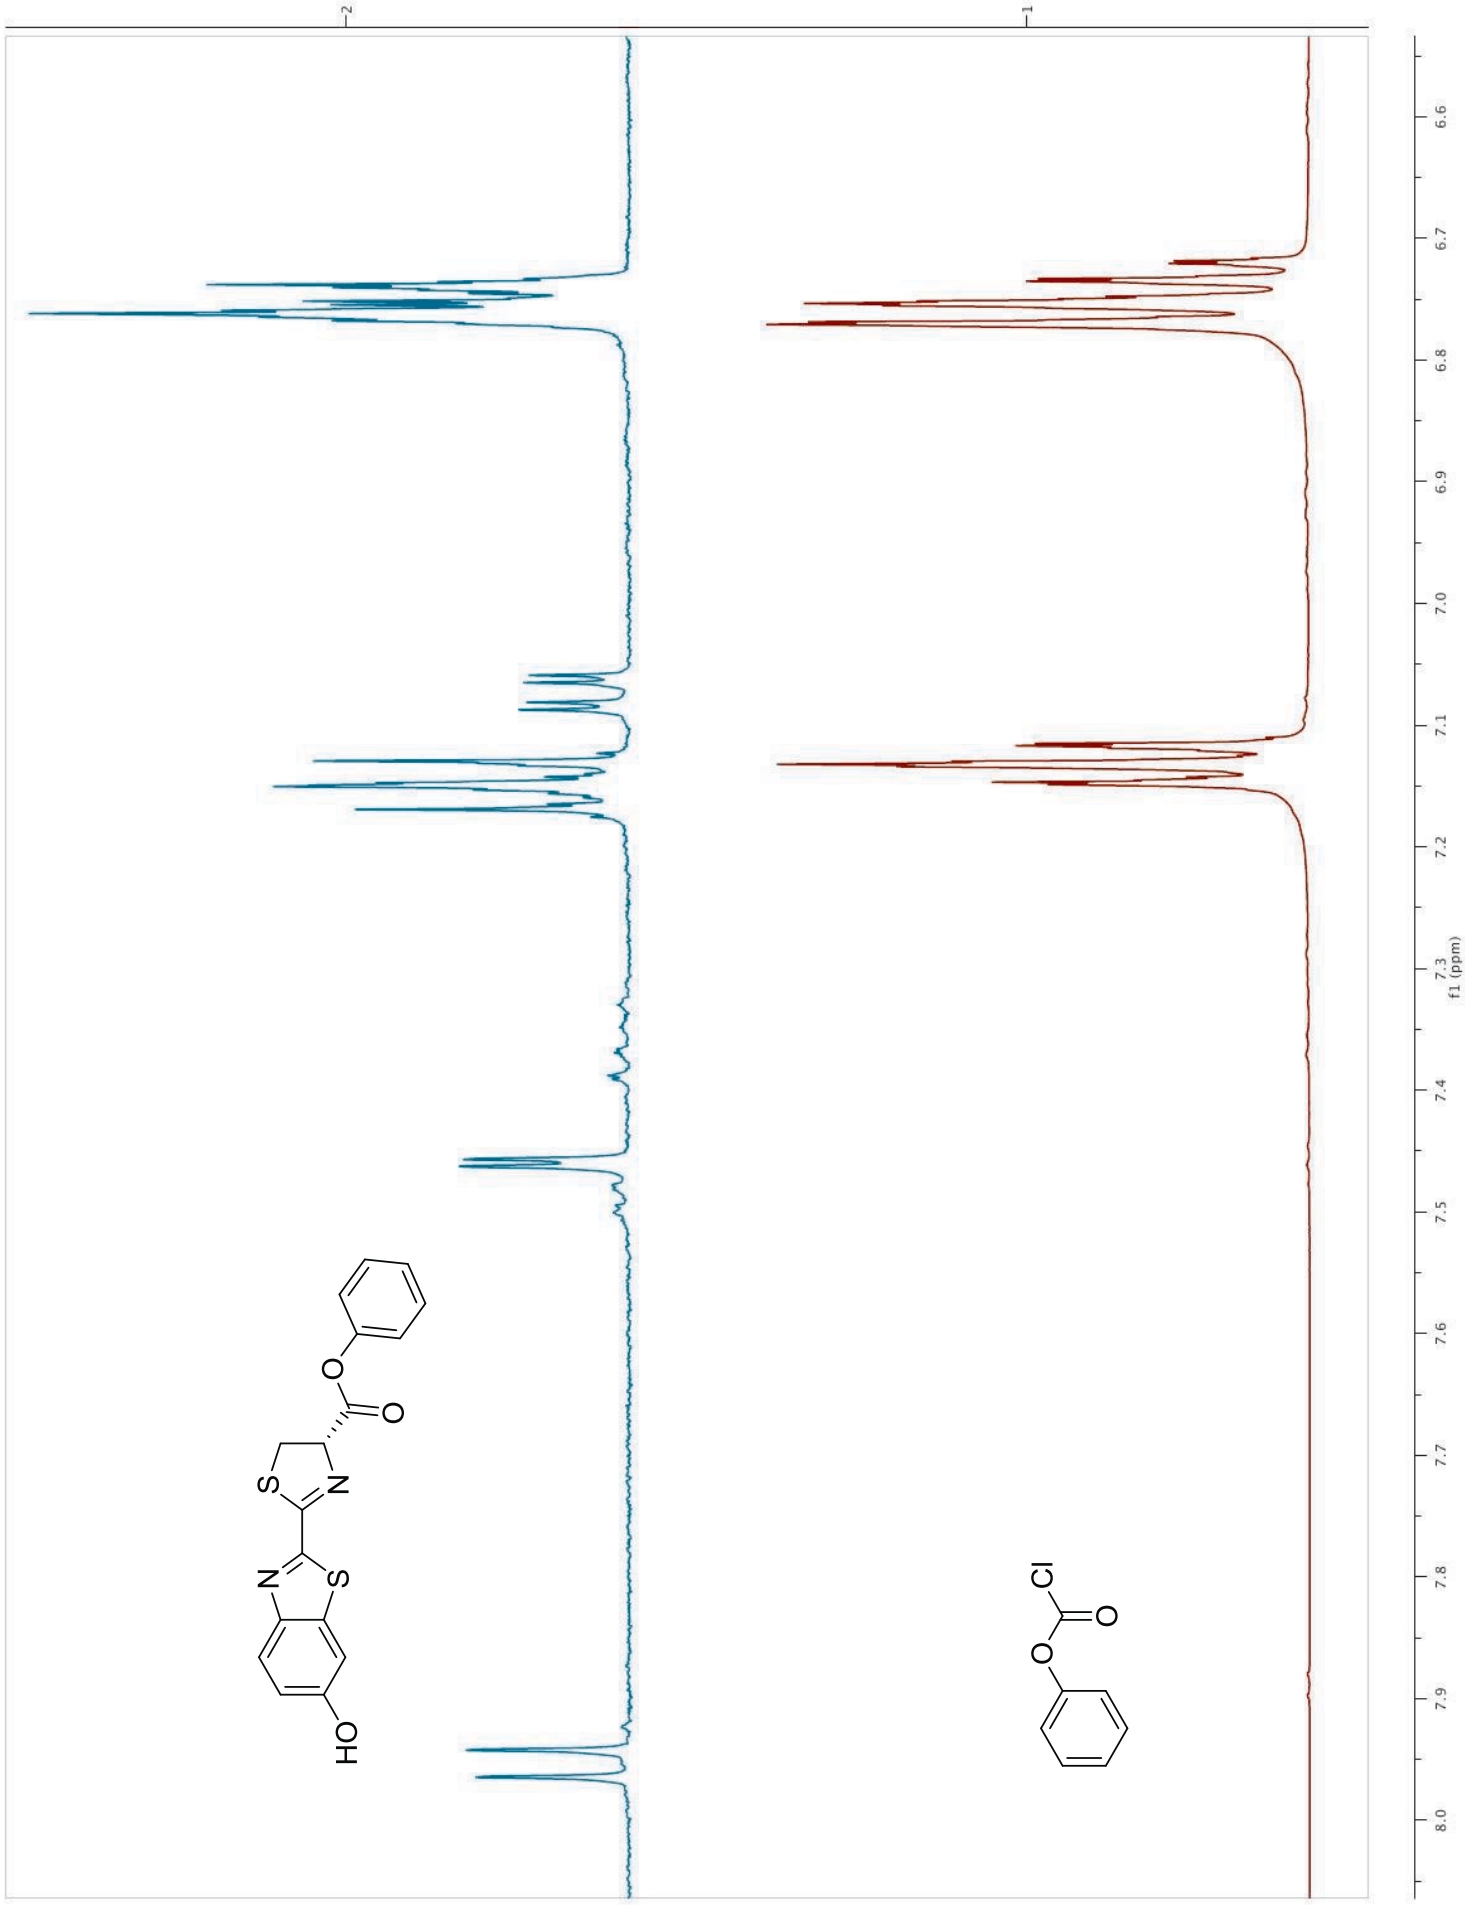

Supplement: NIHMS838720-supplement-Supporting_Information.pdf [file NIHMS838720-supplement-Supporting_Information.pdf]
